# Supplementary material for: Alcohol consumption and site-specific cancer risk: a comprehensive dose–response meta-analysis
Source: PubMed Central journal article supplement — Br J Cancer. 2014 Nov 25;112(3):580–93. doi: 10.1038/bjc.2014.579 (PMC4453639; doi:10.1038/bjc.2014.579), 2014-11-25

# **Oral cavity and pharynx**

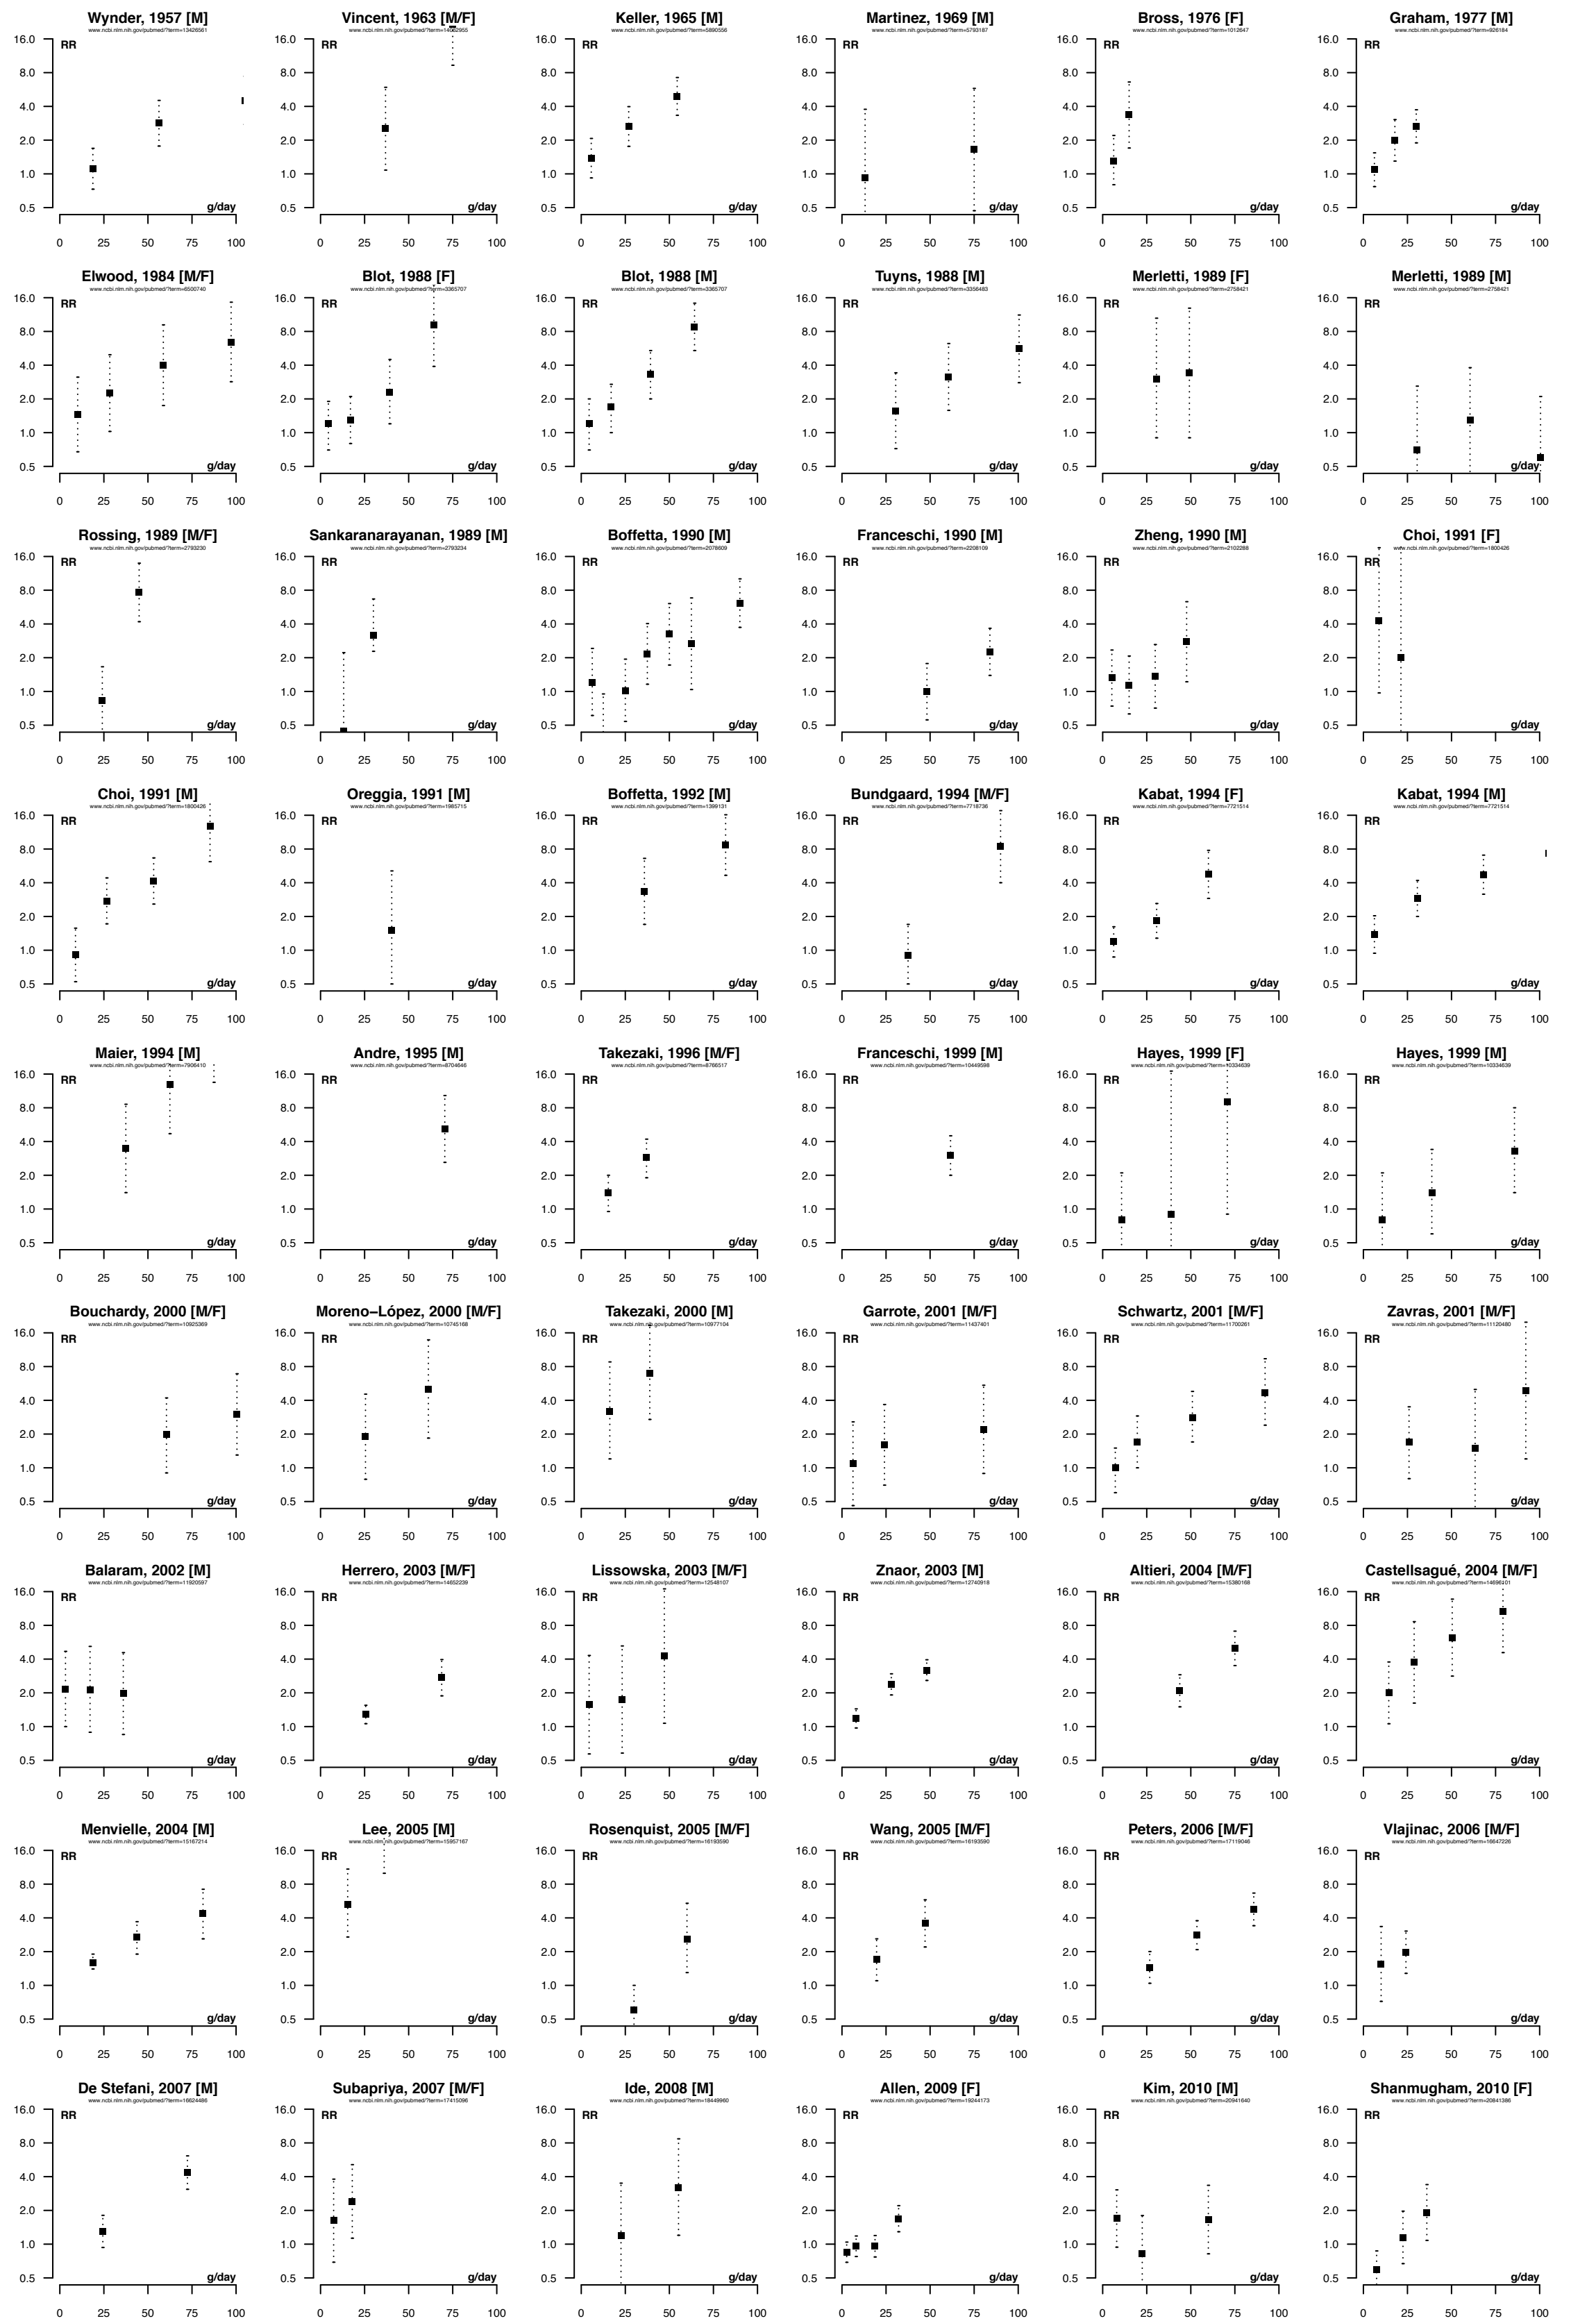

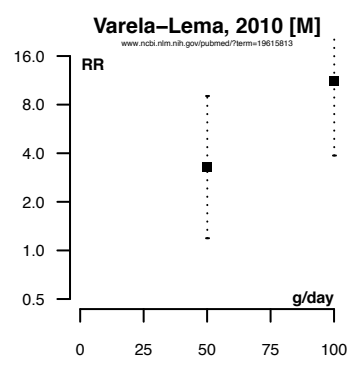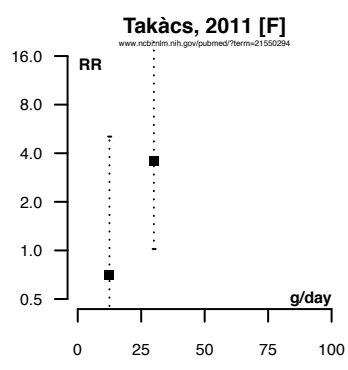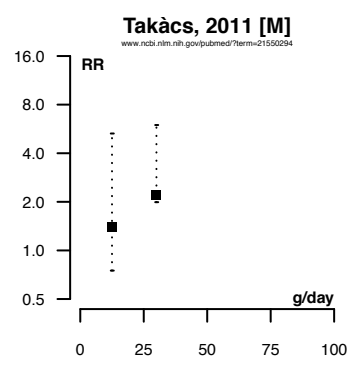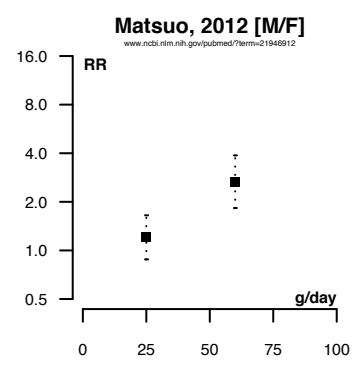

# **Esophageal Squamous Cell Carcinoma**

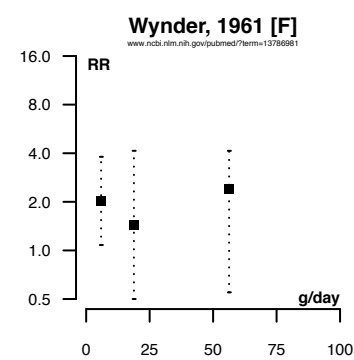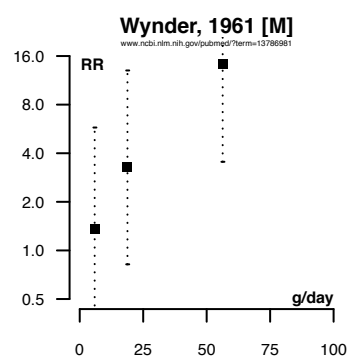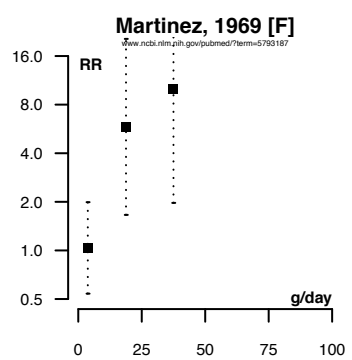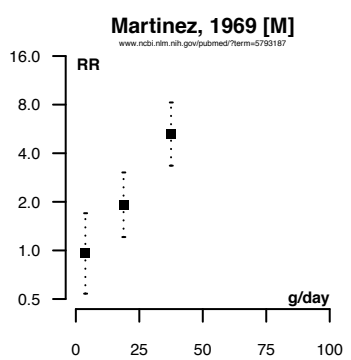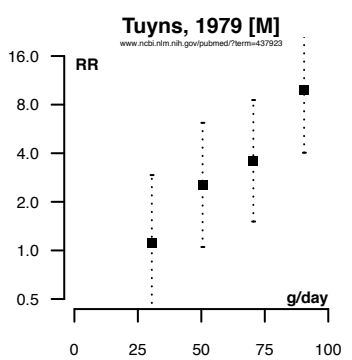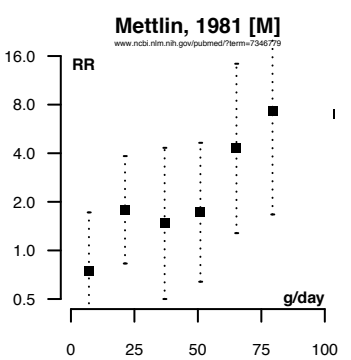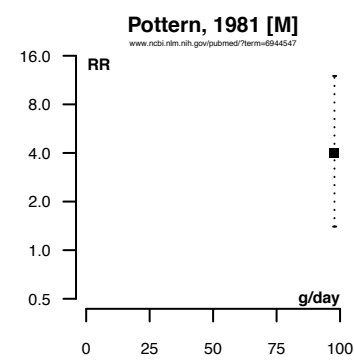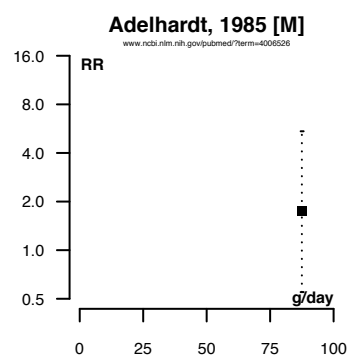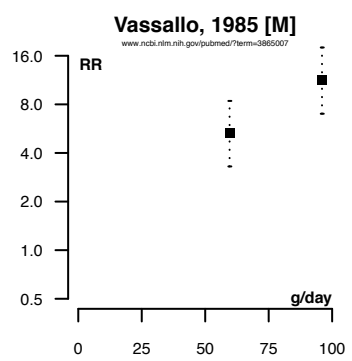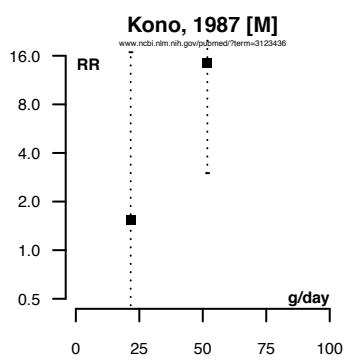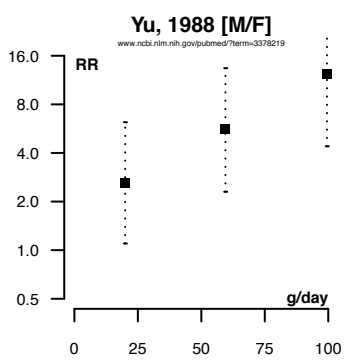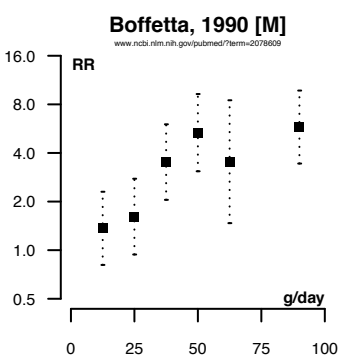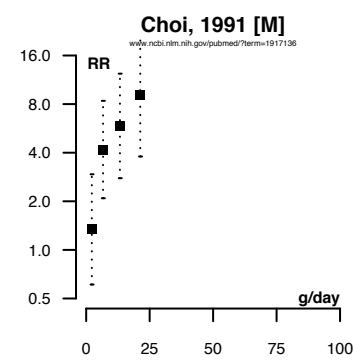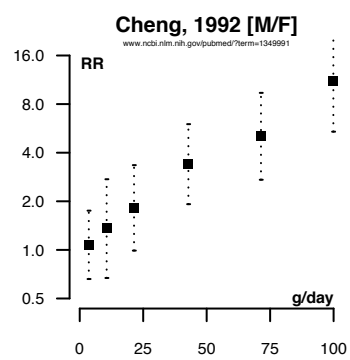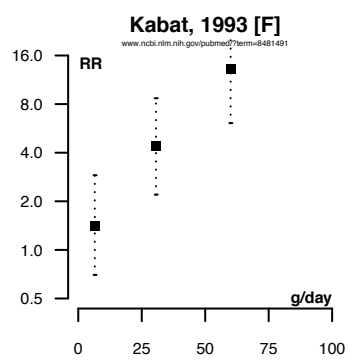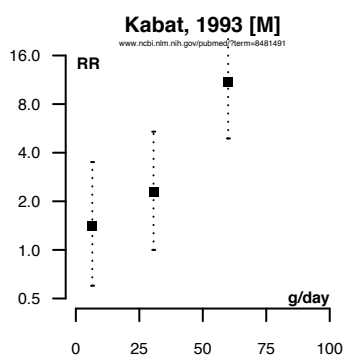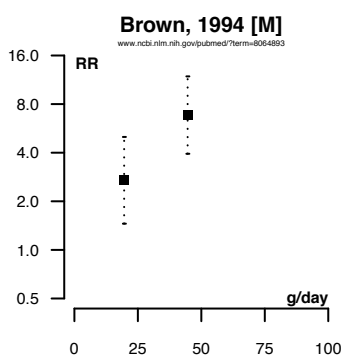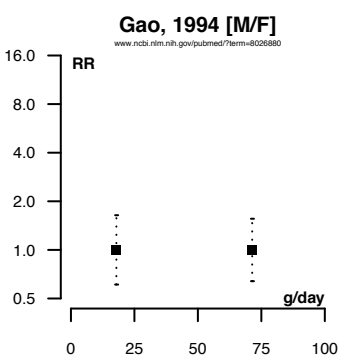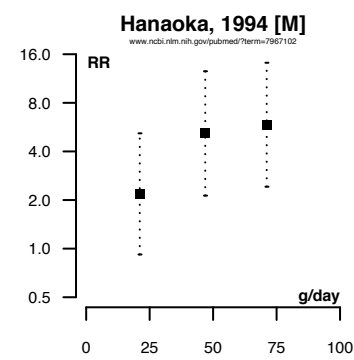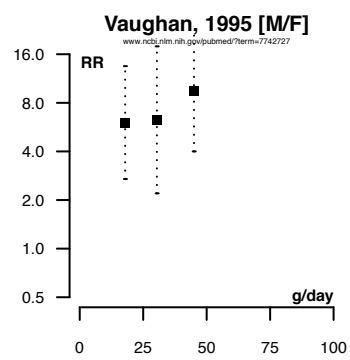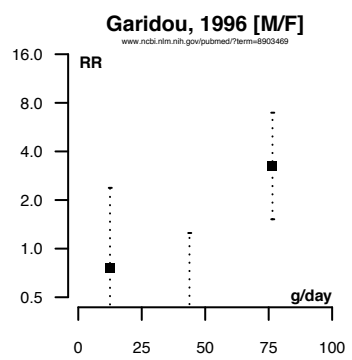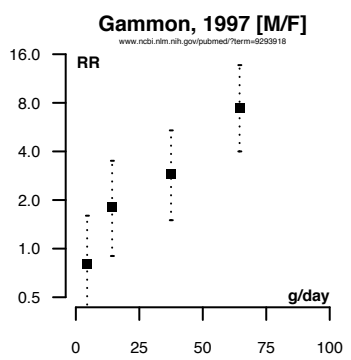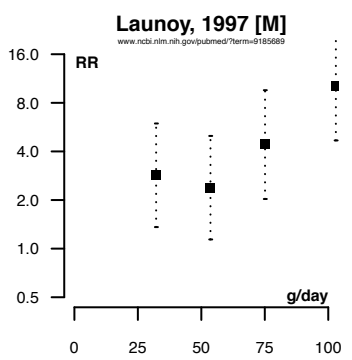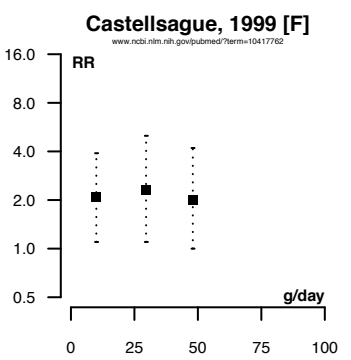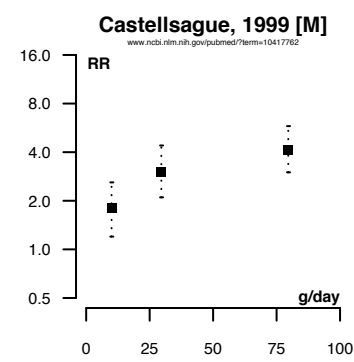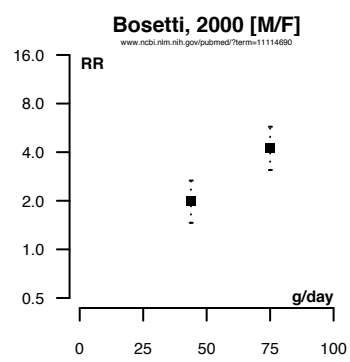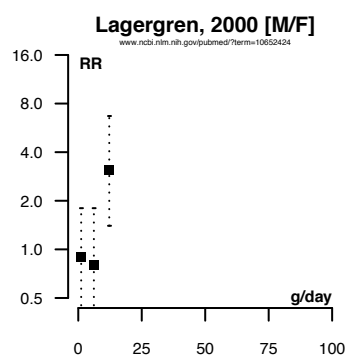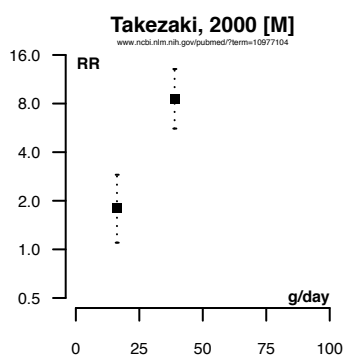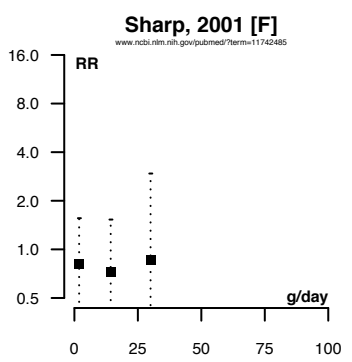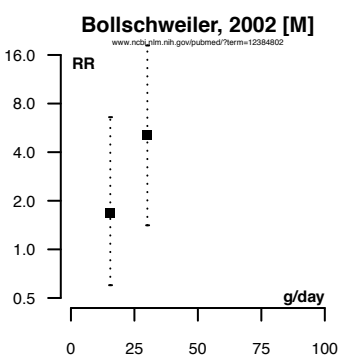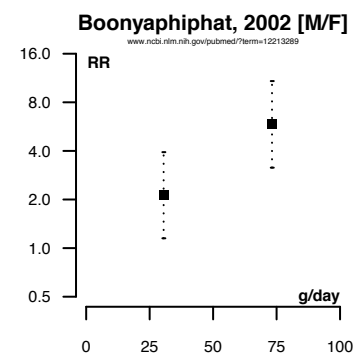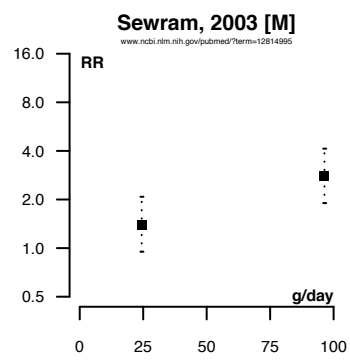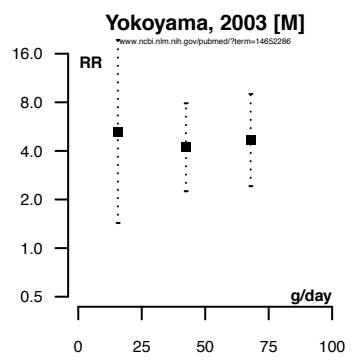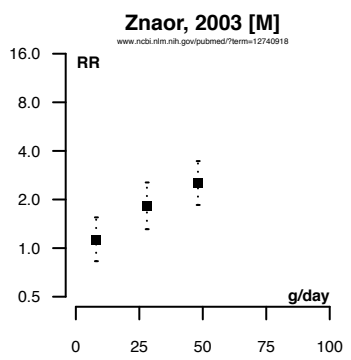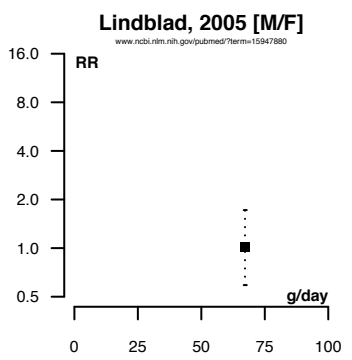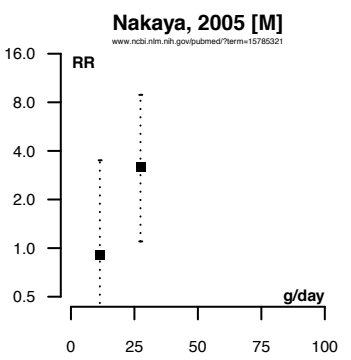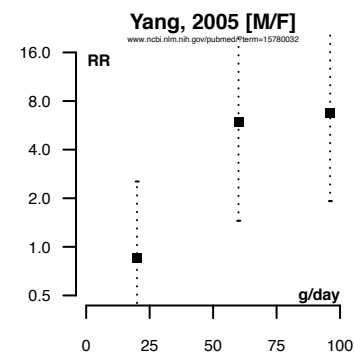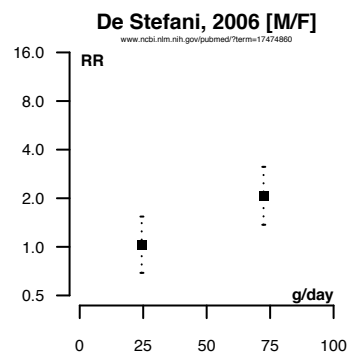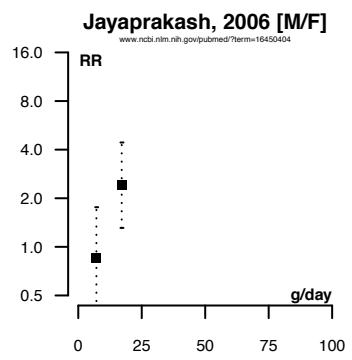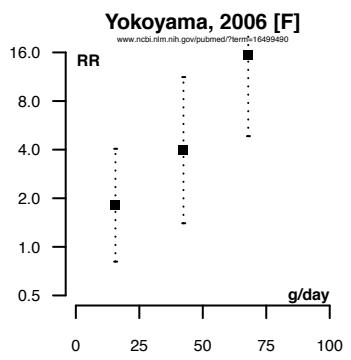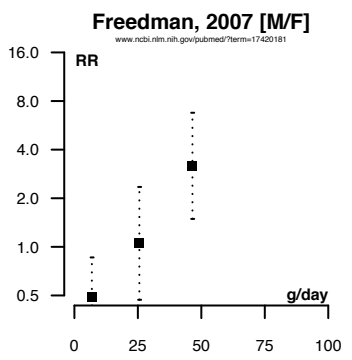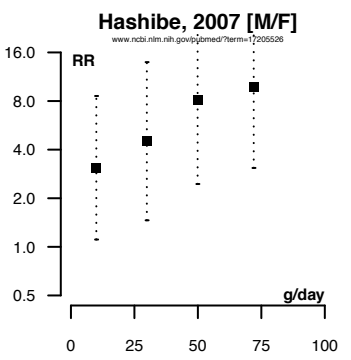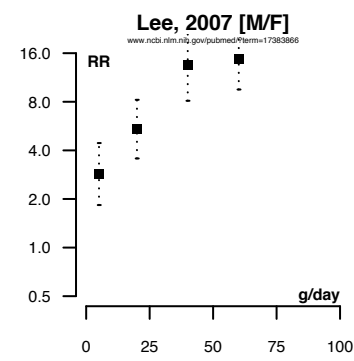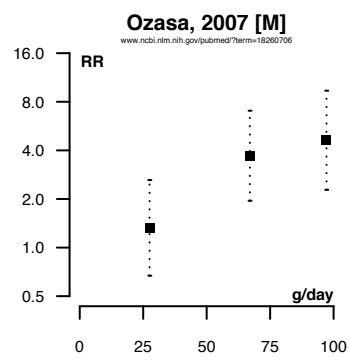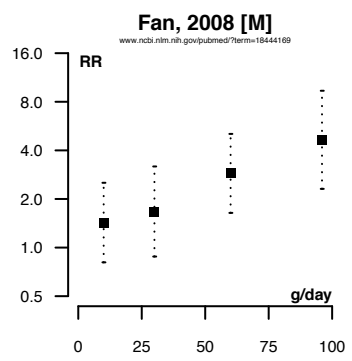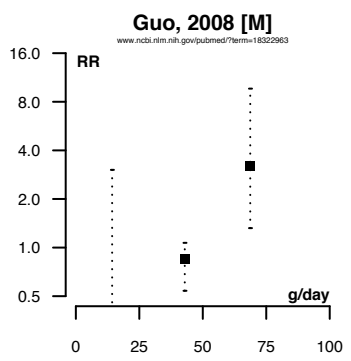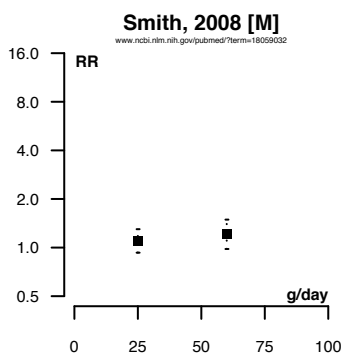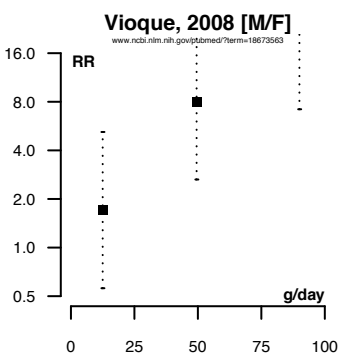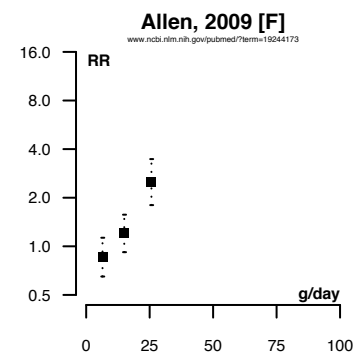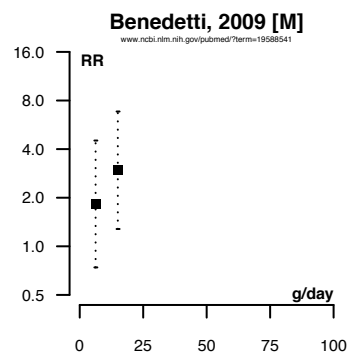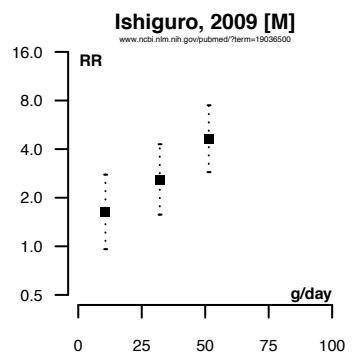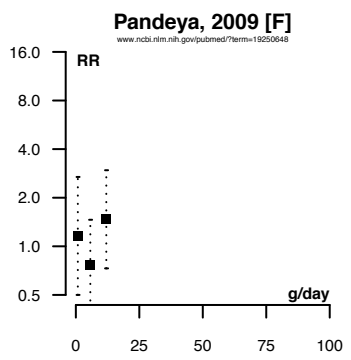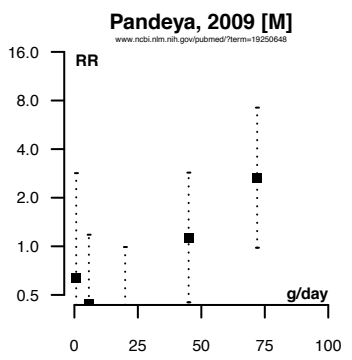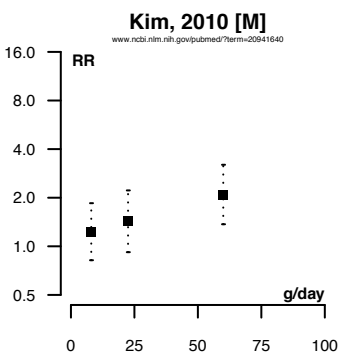

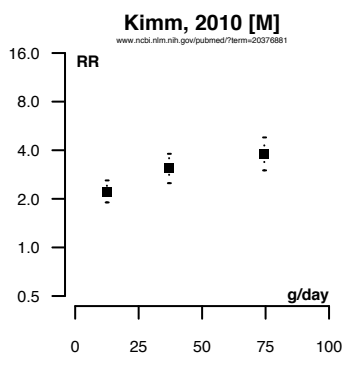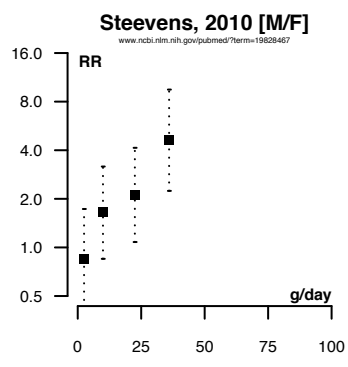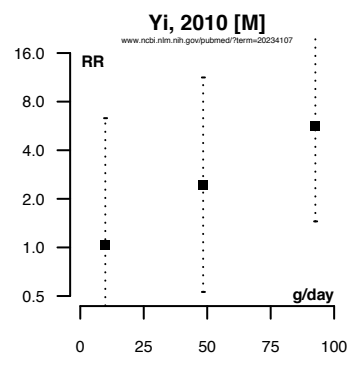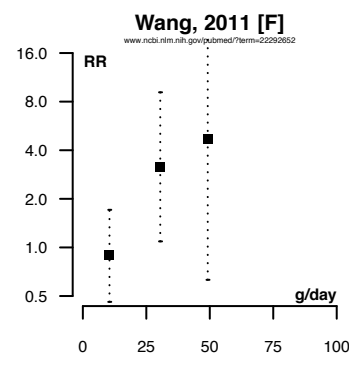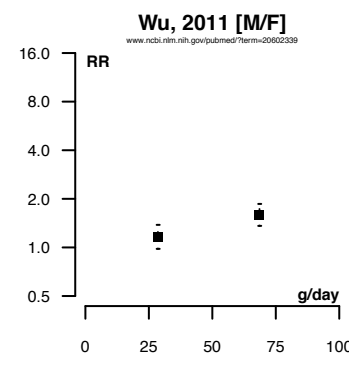

# **Esophageal Adenocarcinoma and Gastric Cardia**

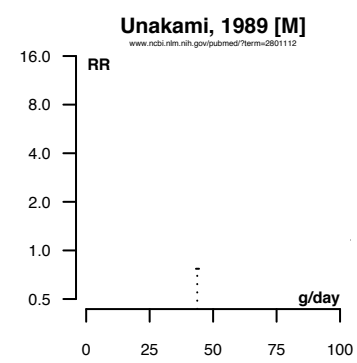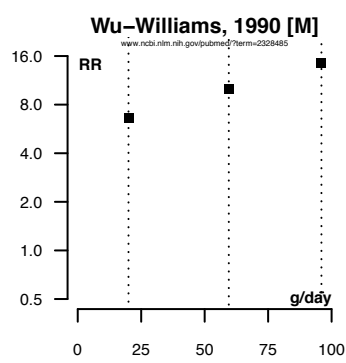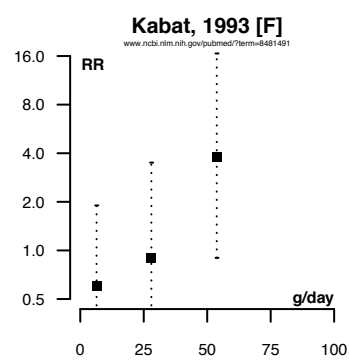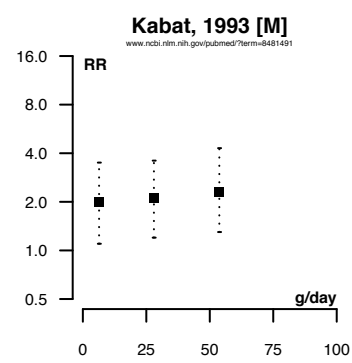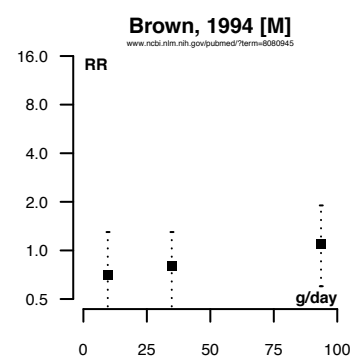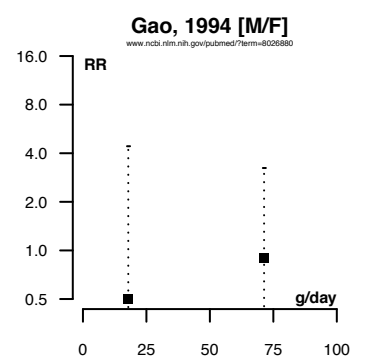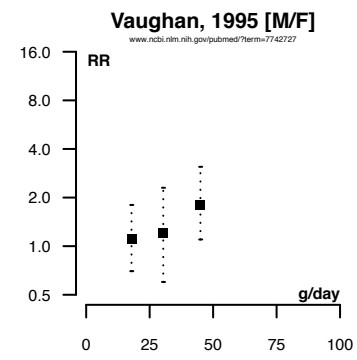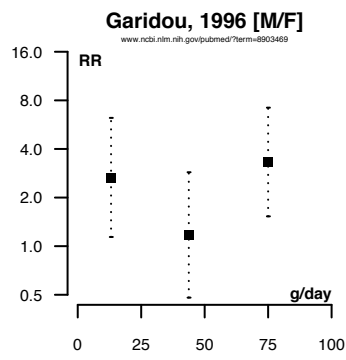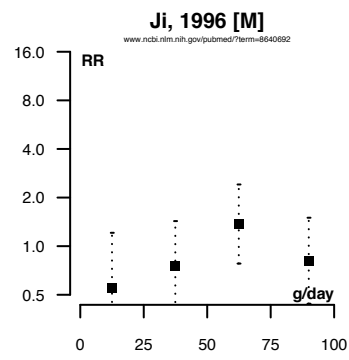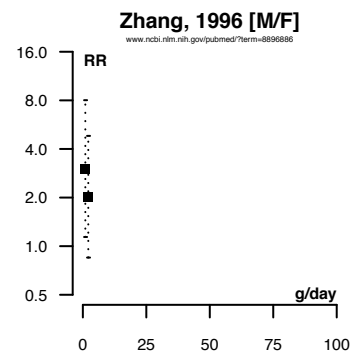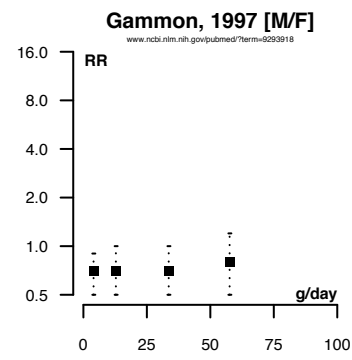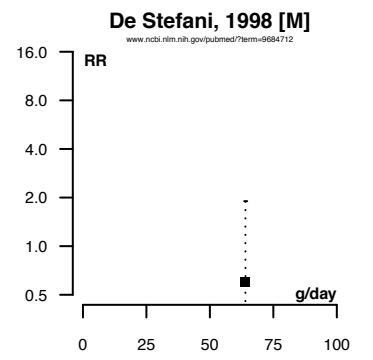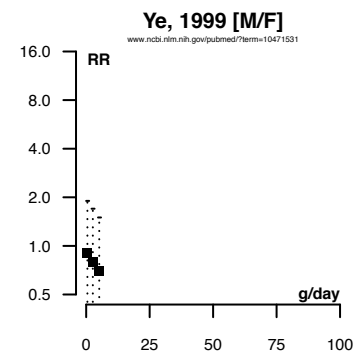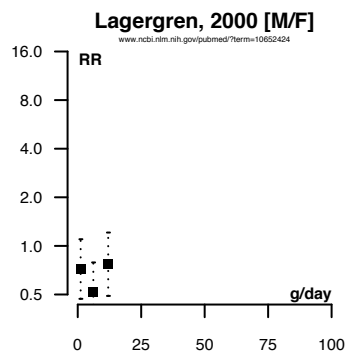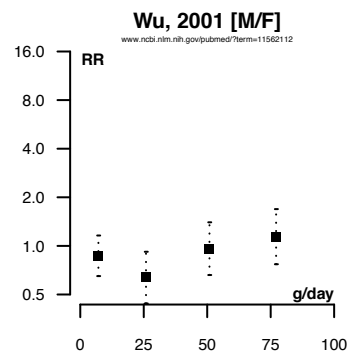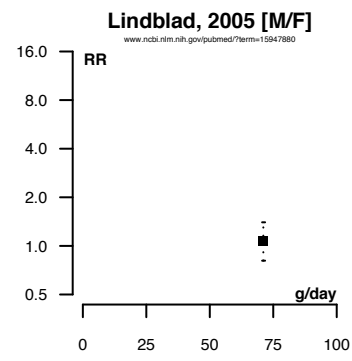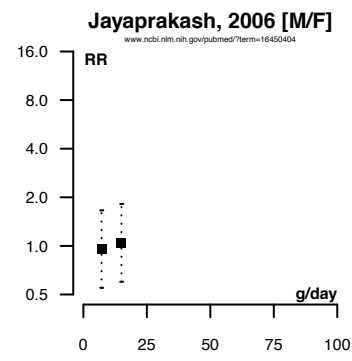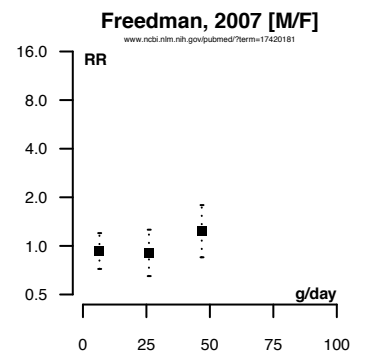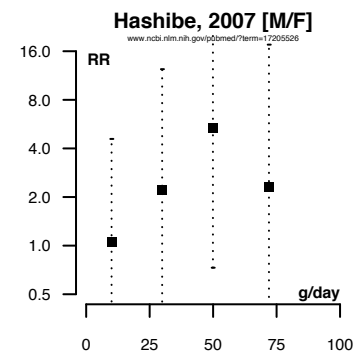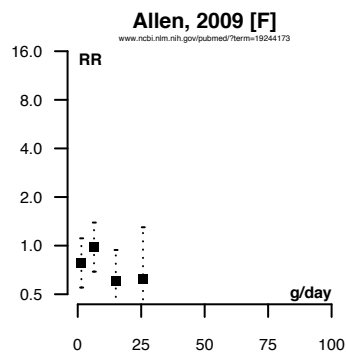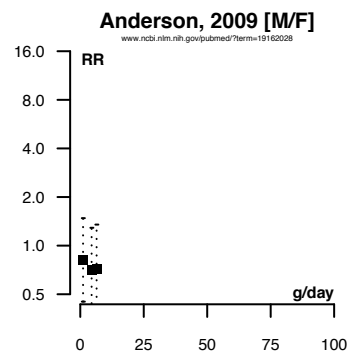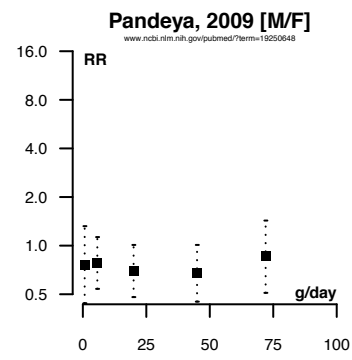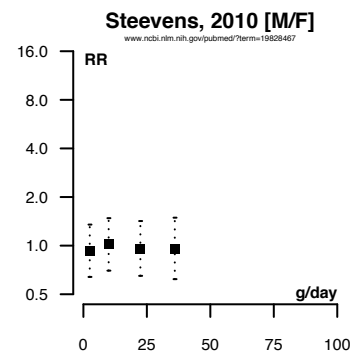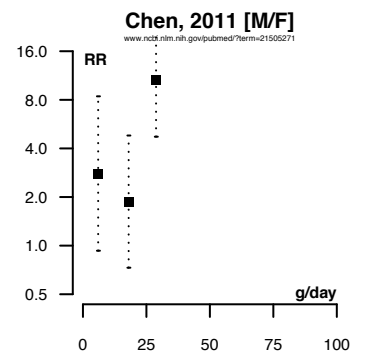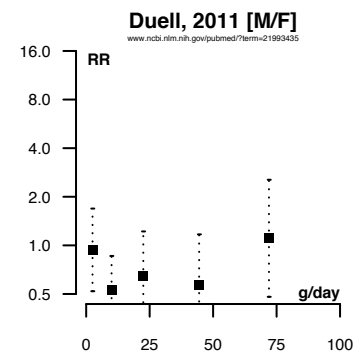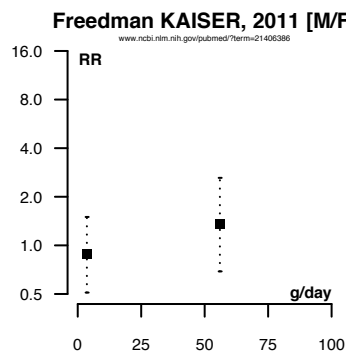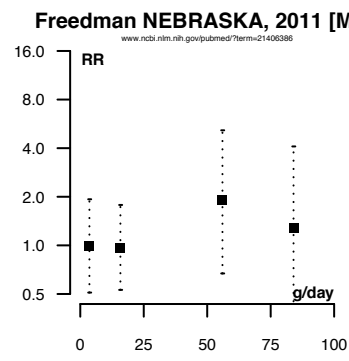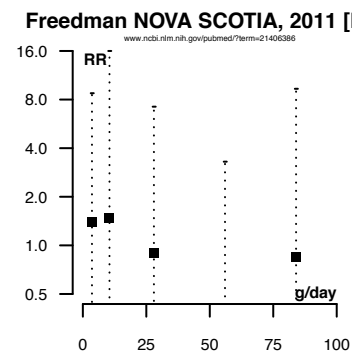



# **Stomach**

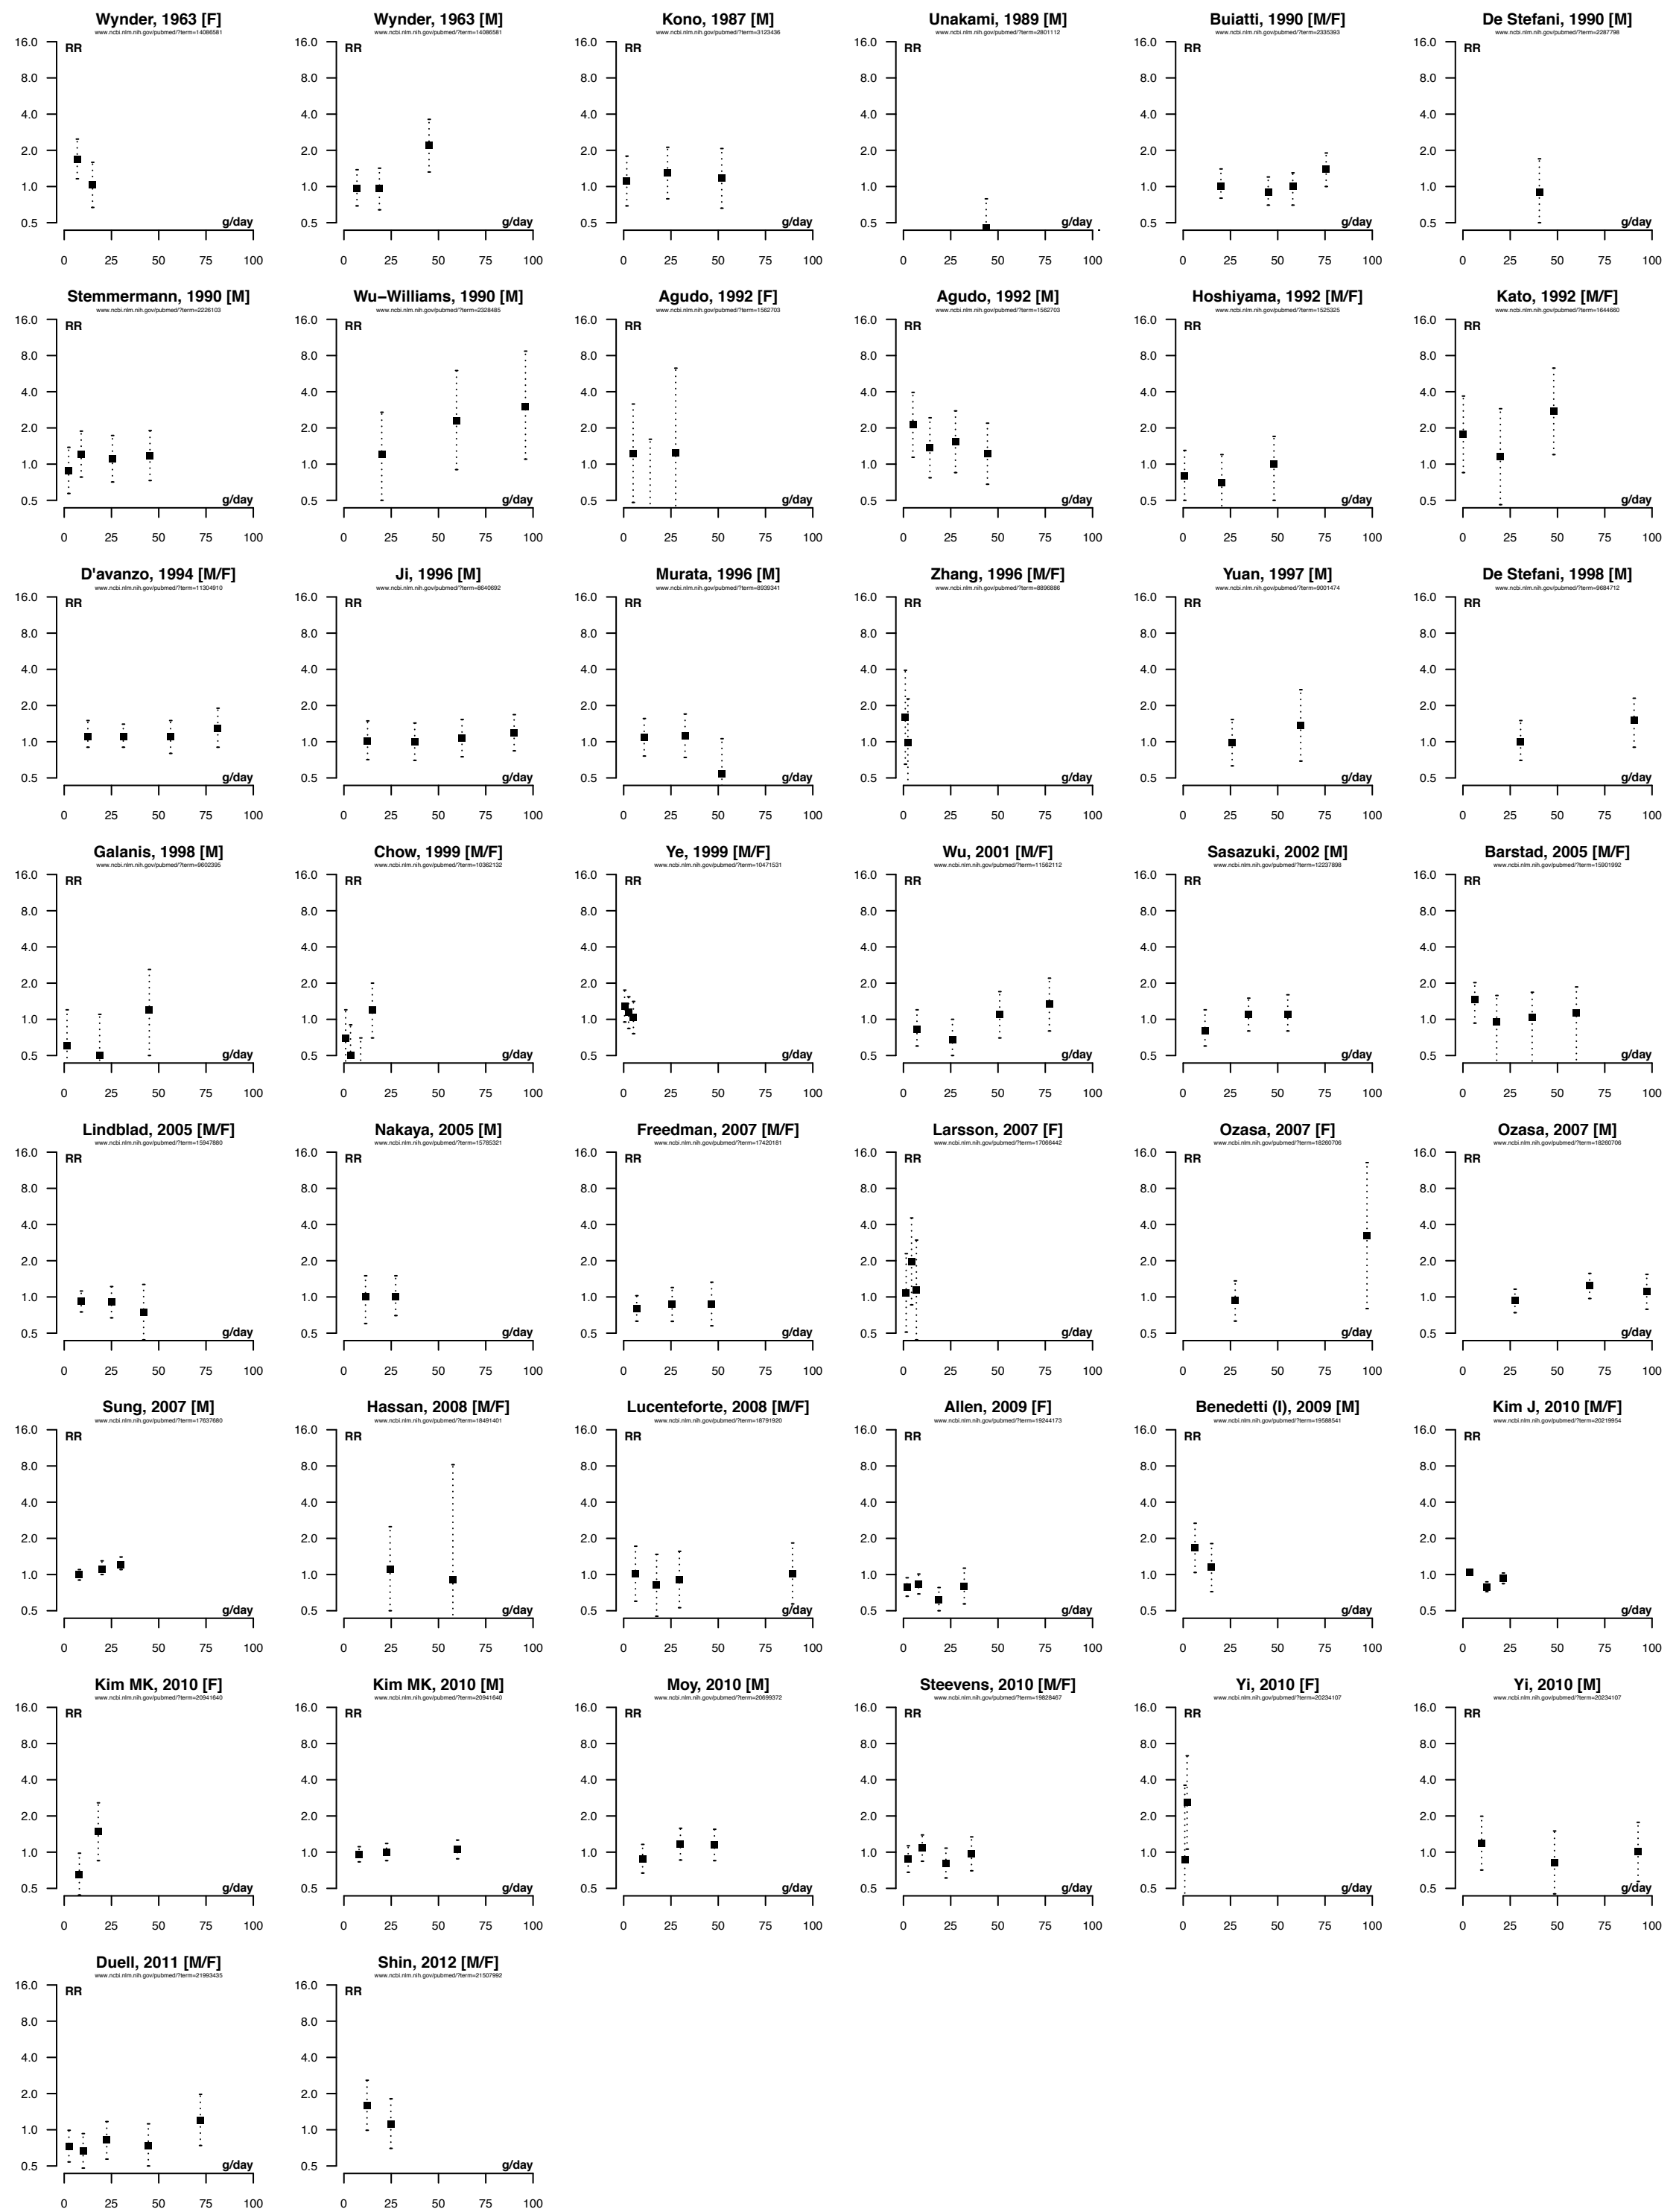

# **Small Intestine**

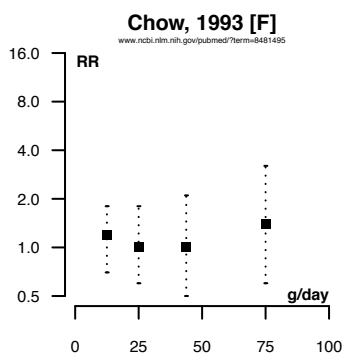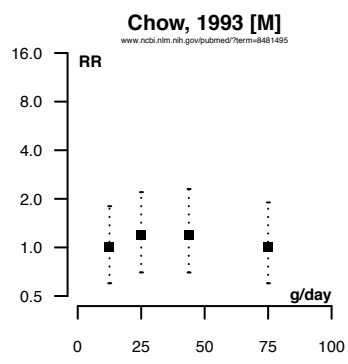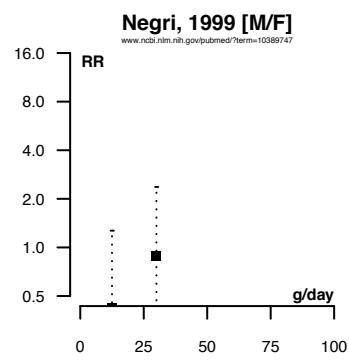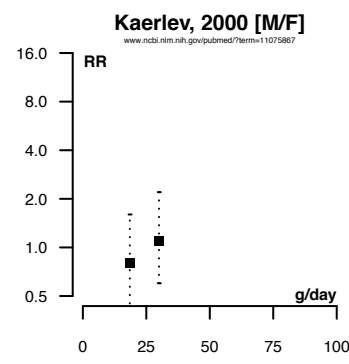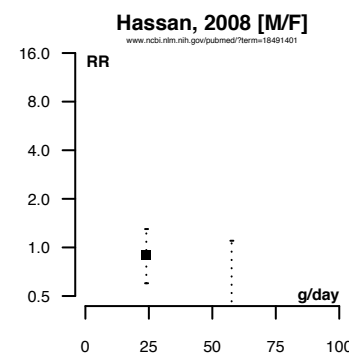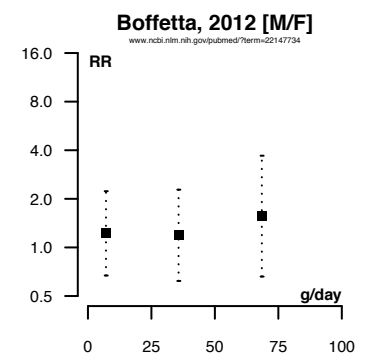

# Colorectum

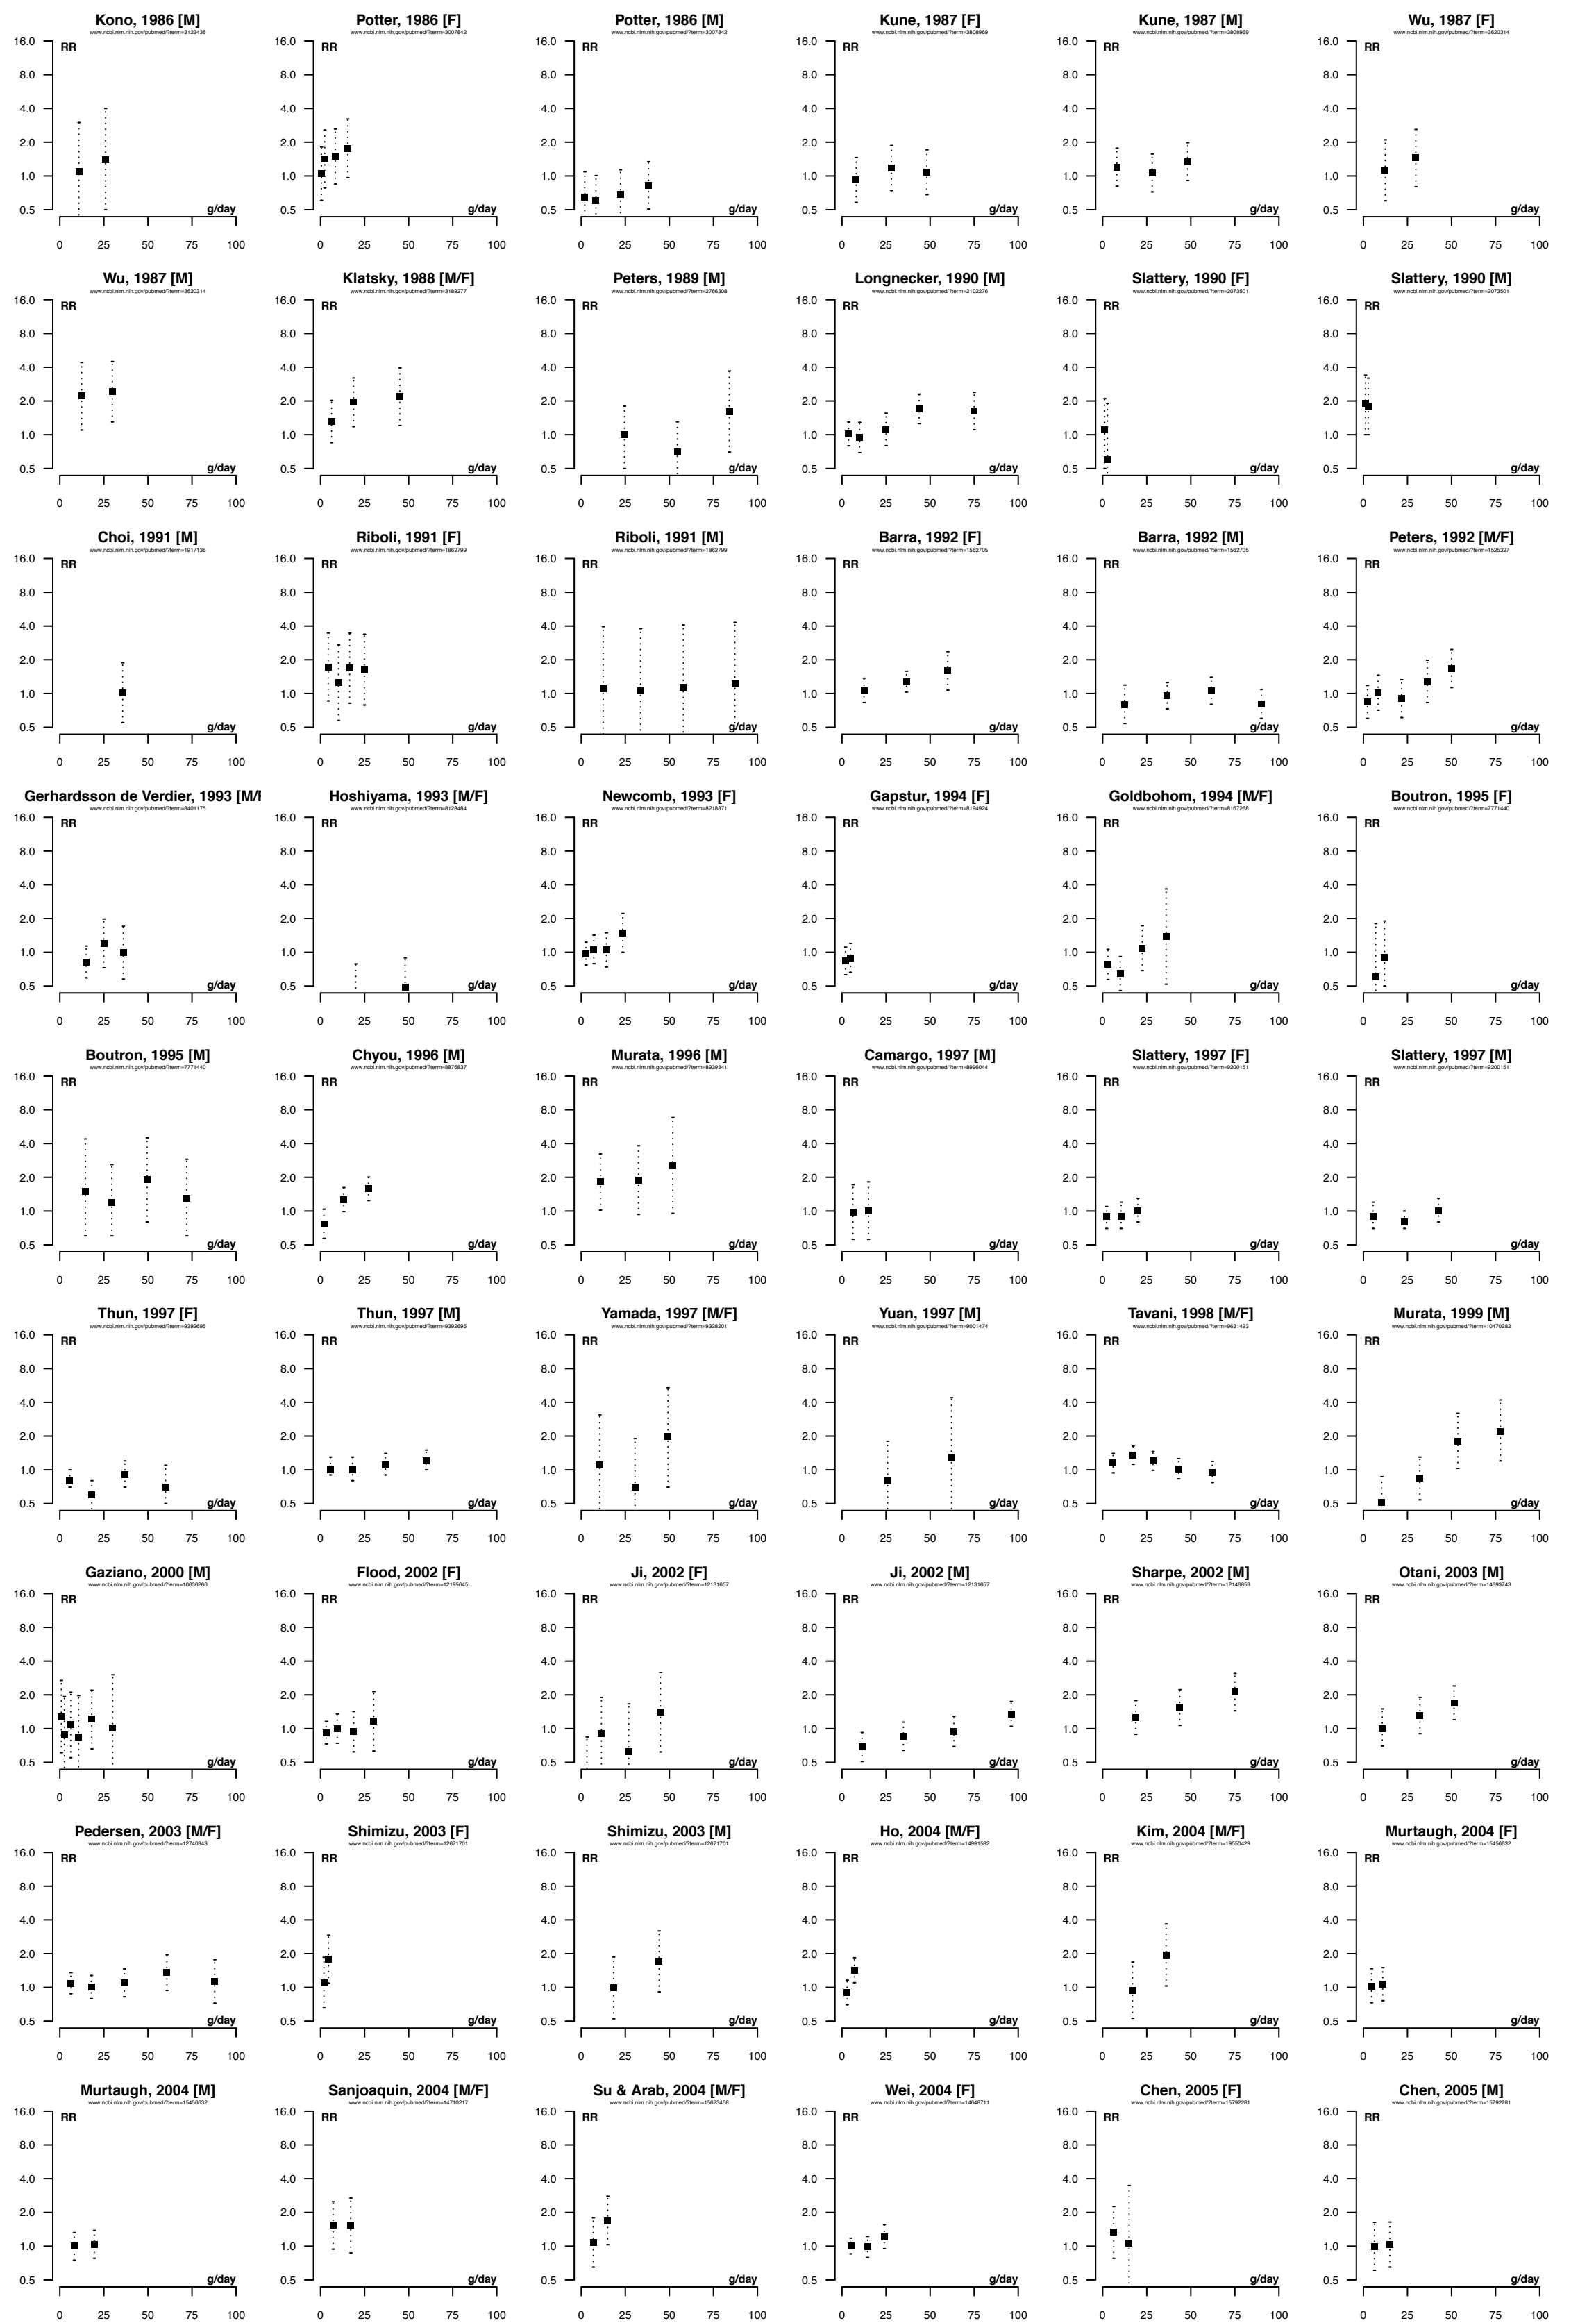

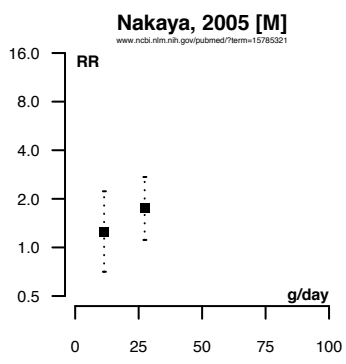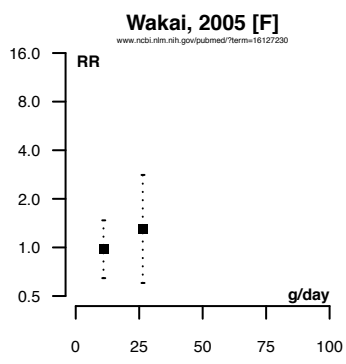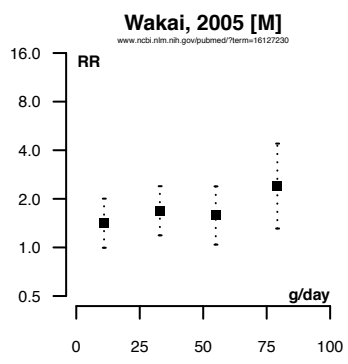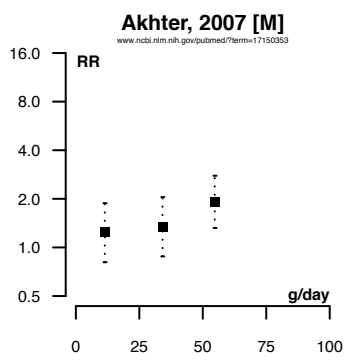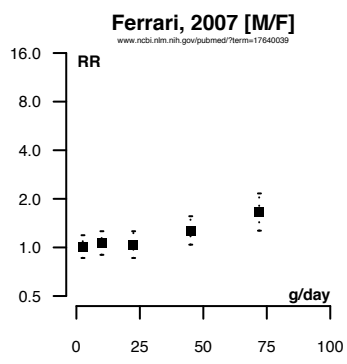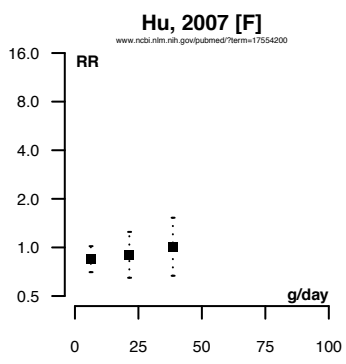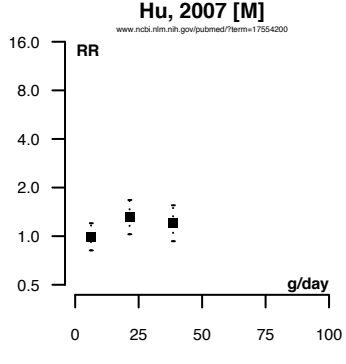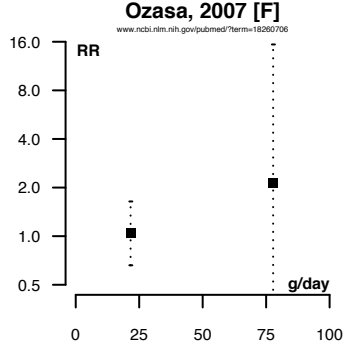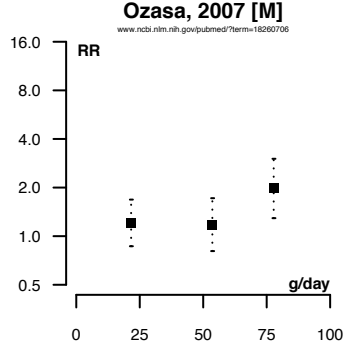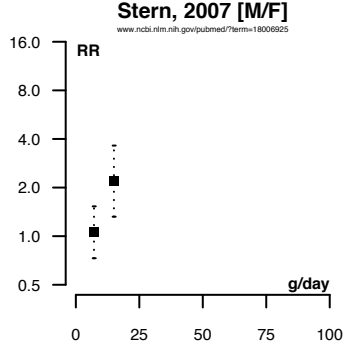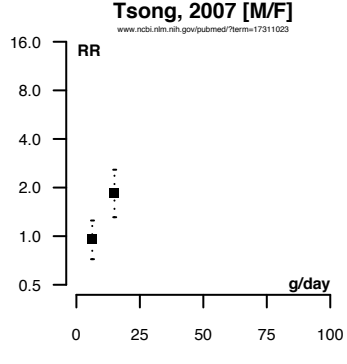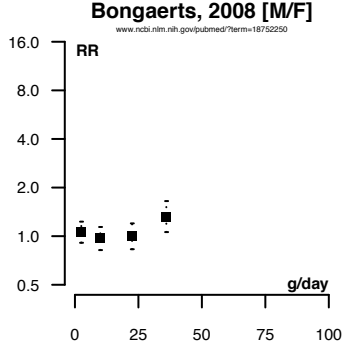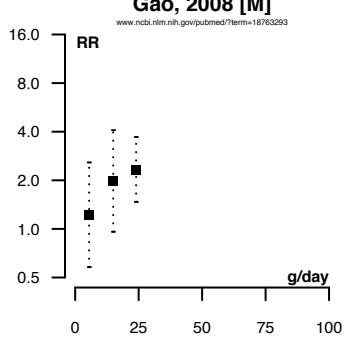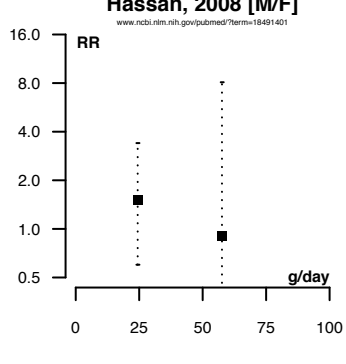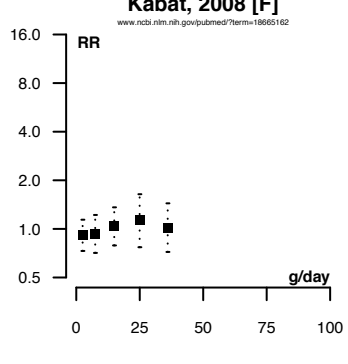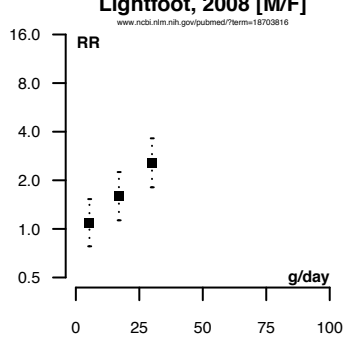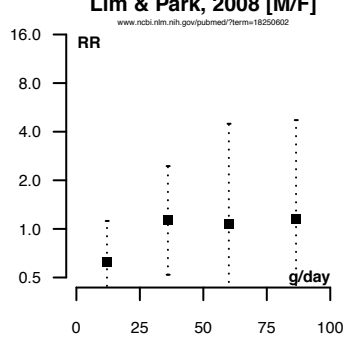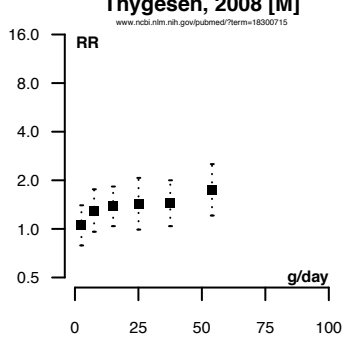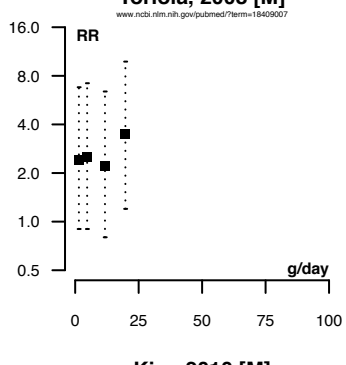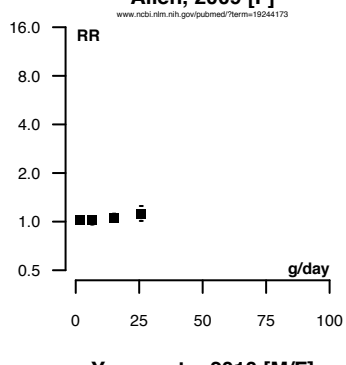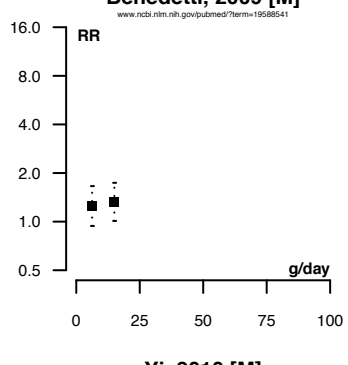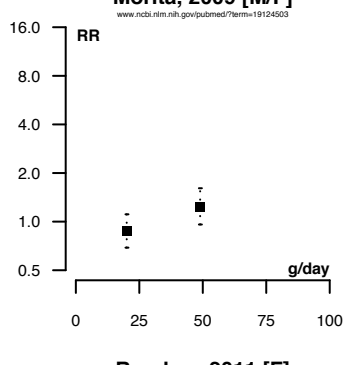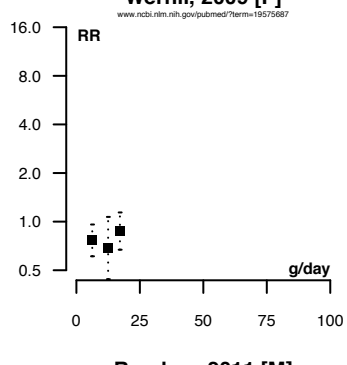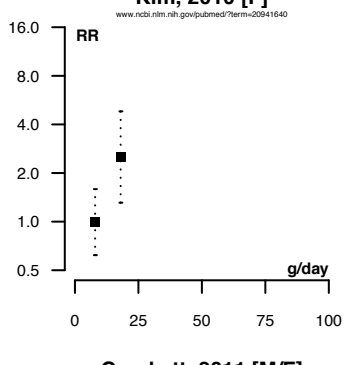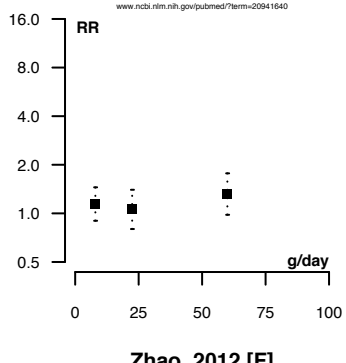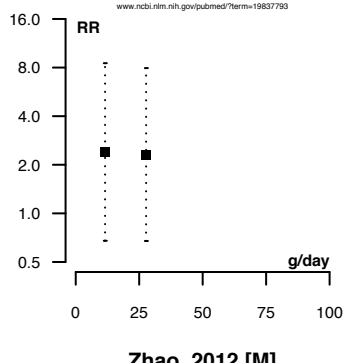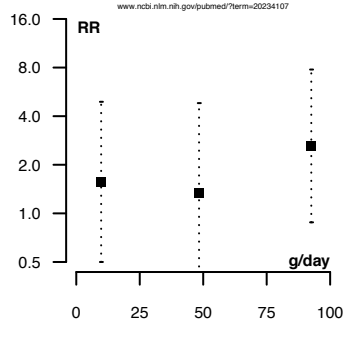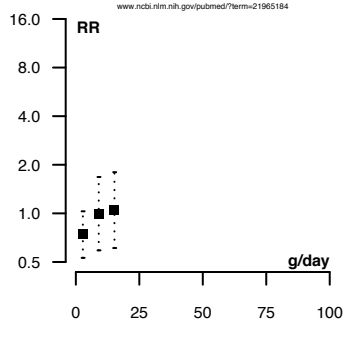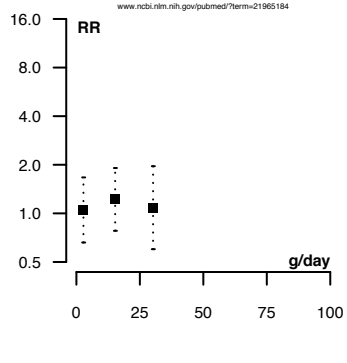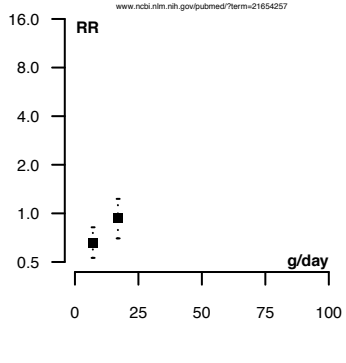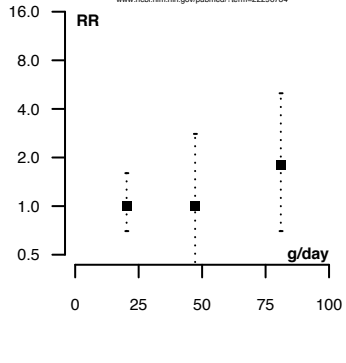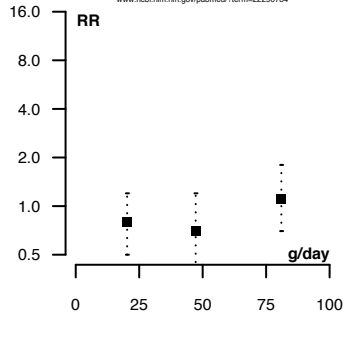

# Liver



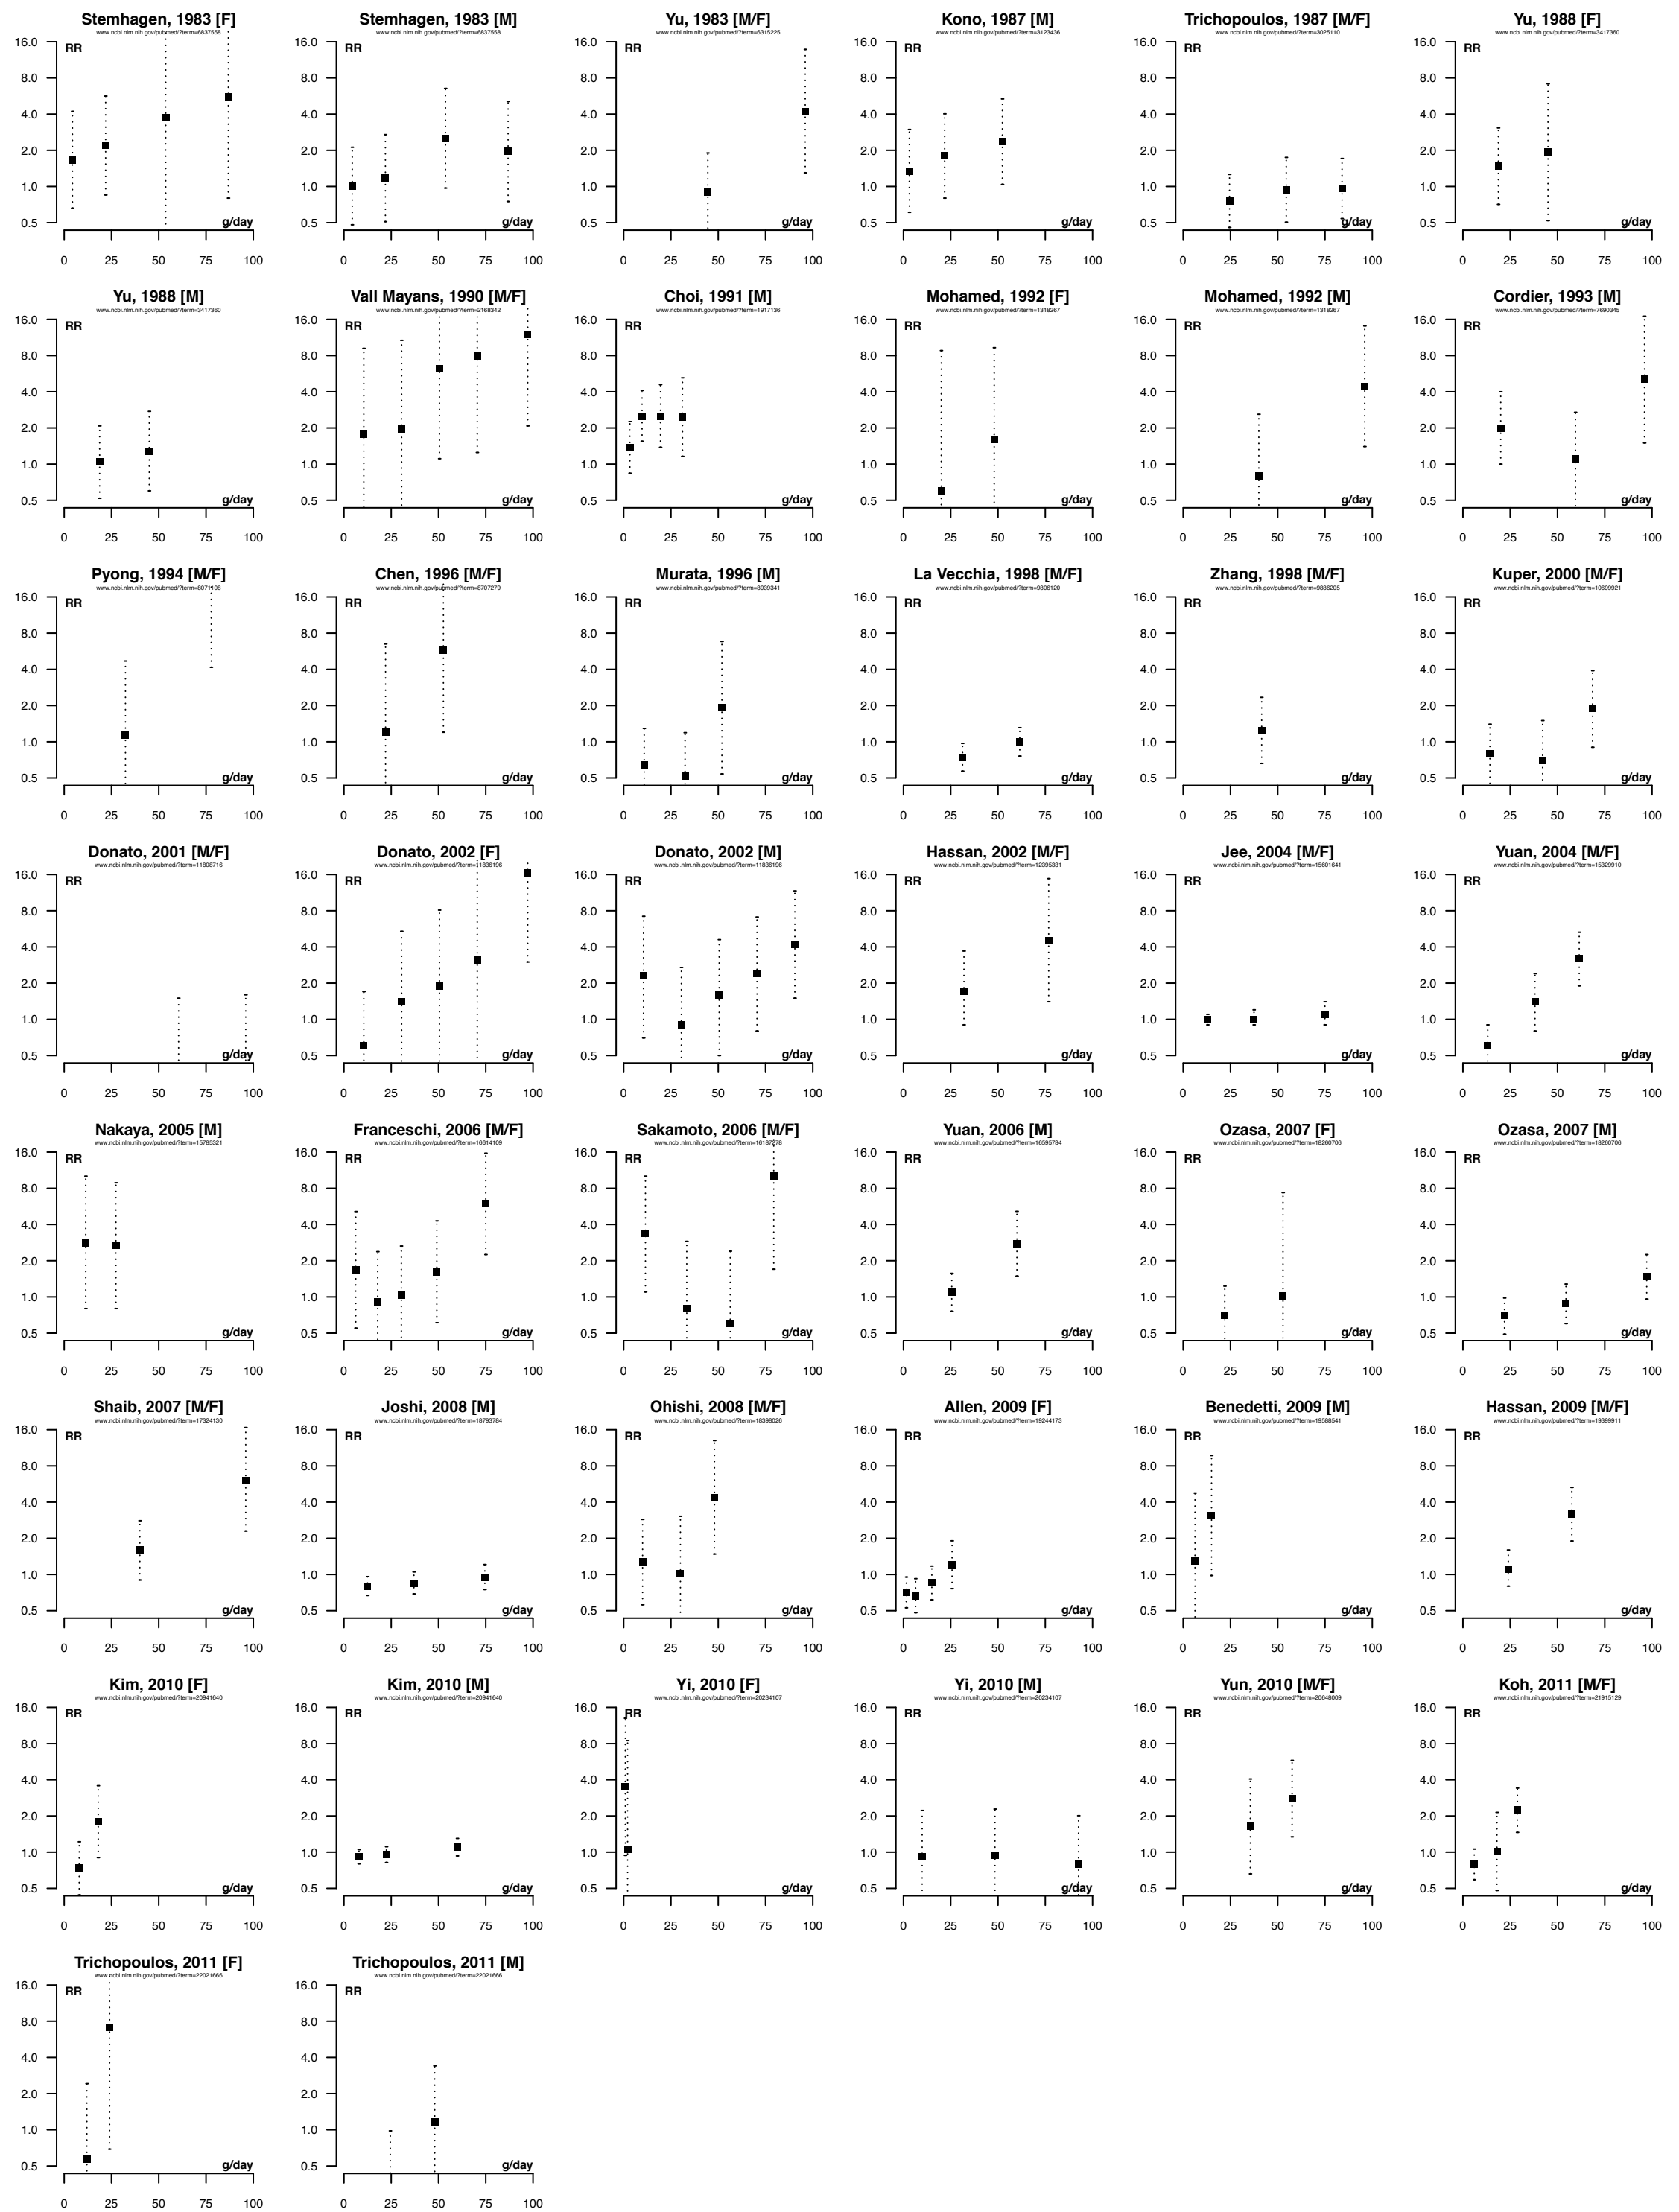

# Gallbladder

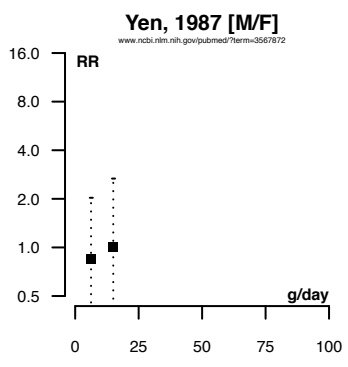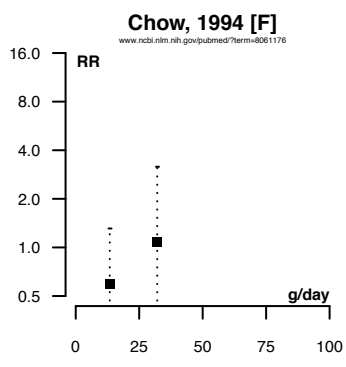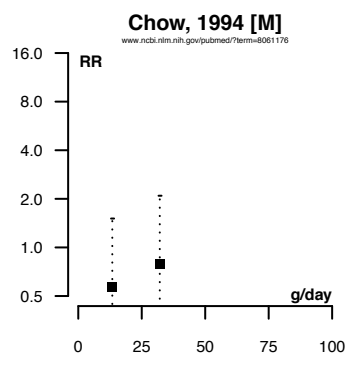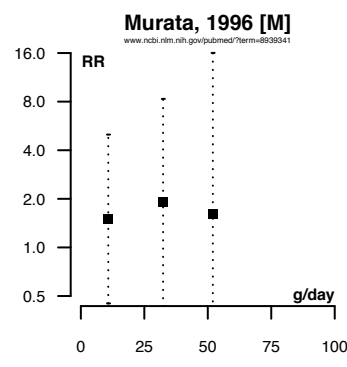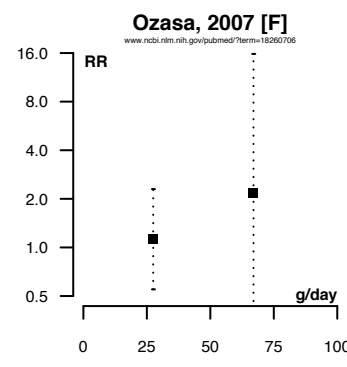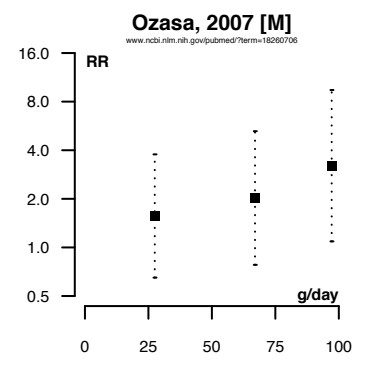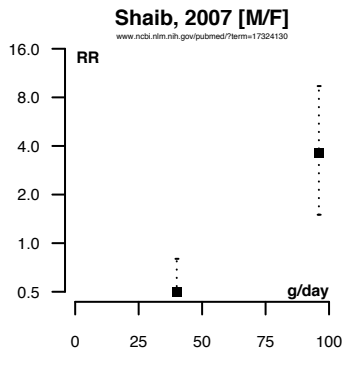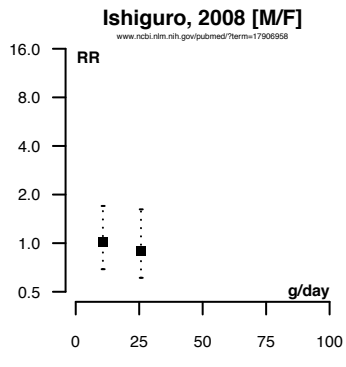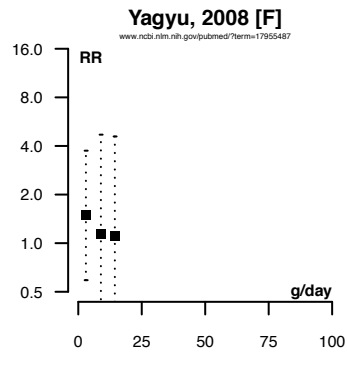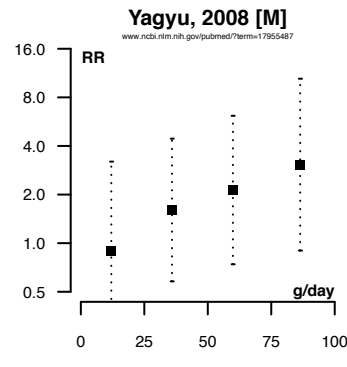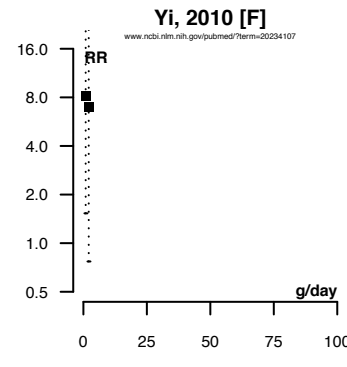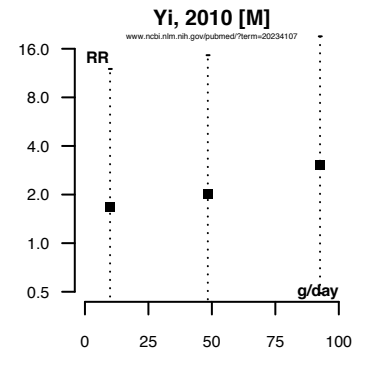

# **Pancreas**

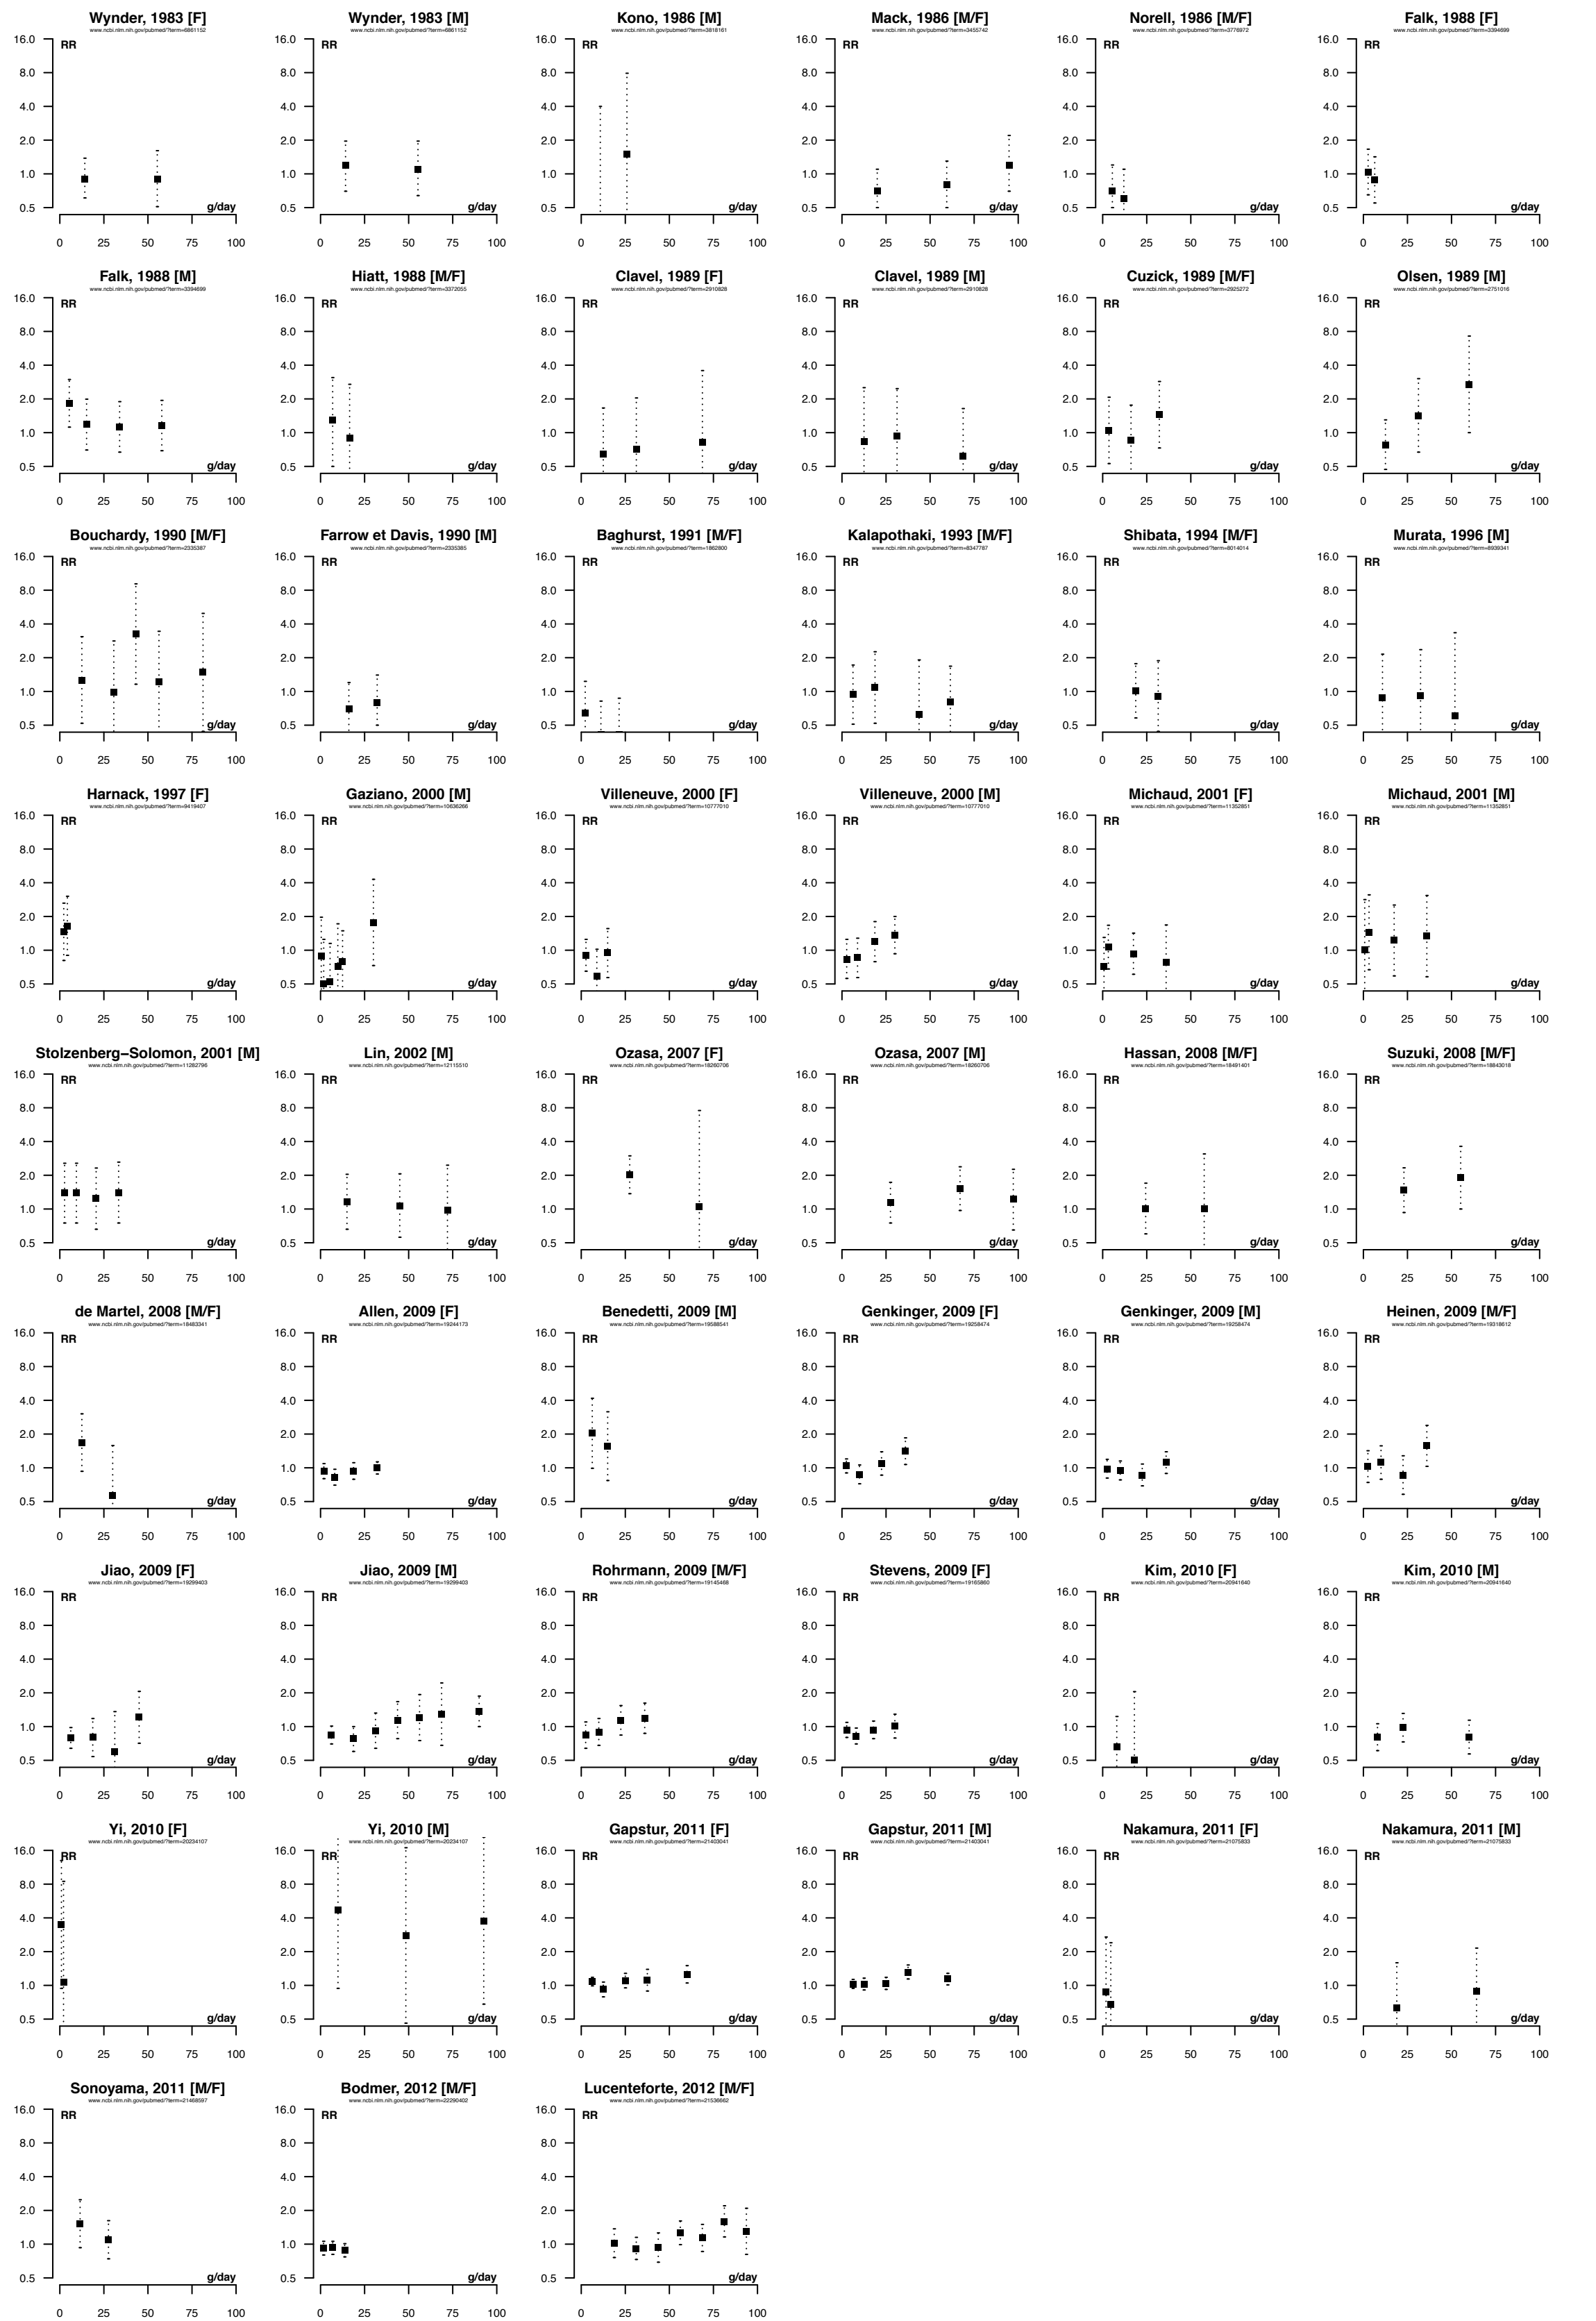

# Larynx

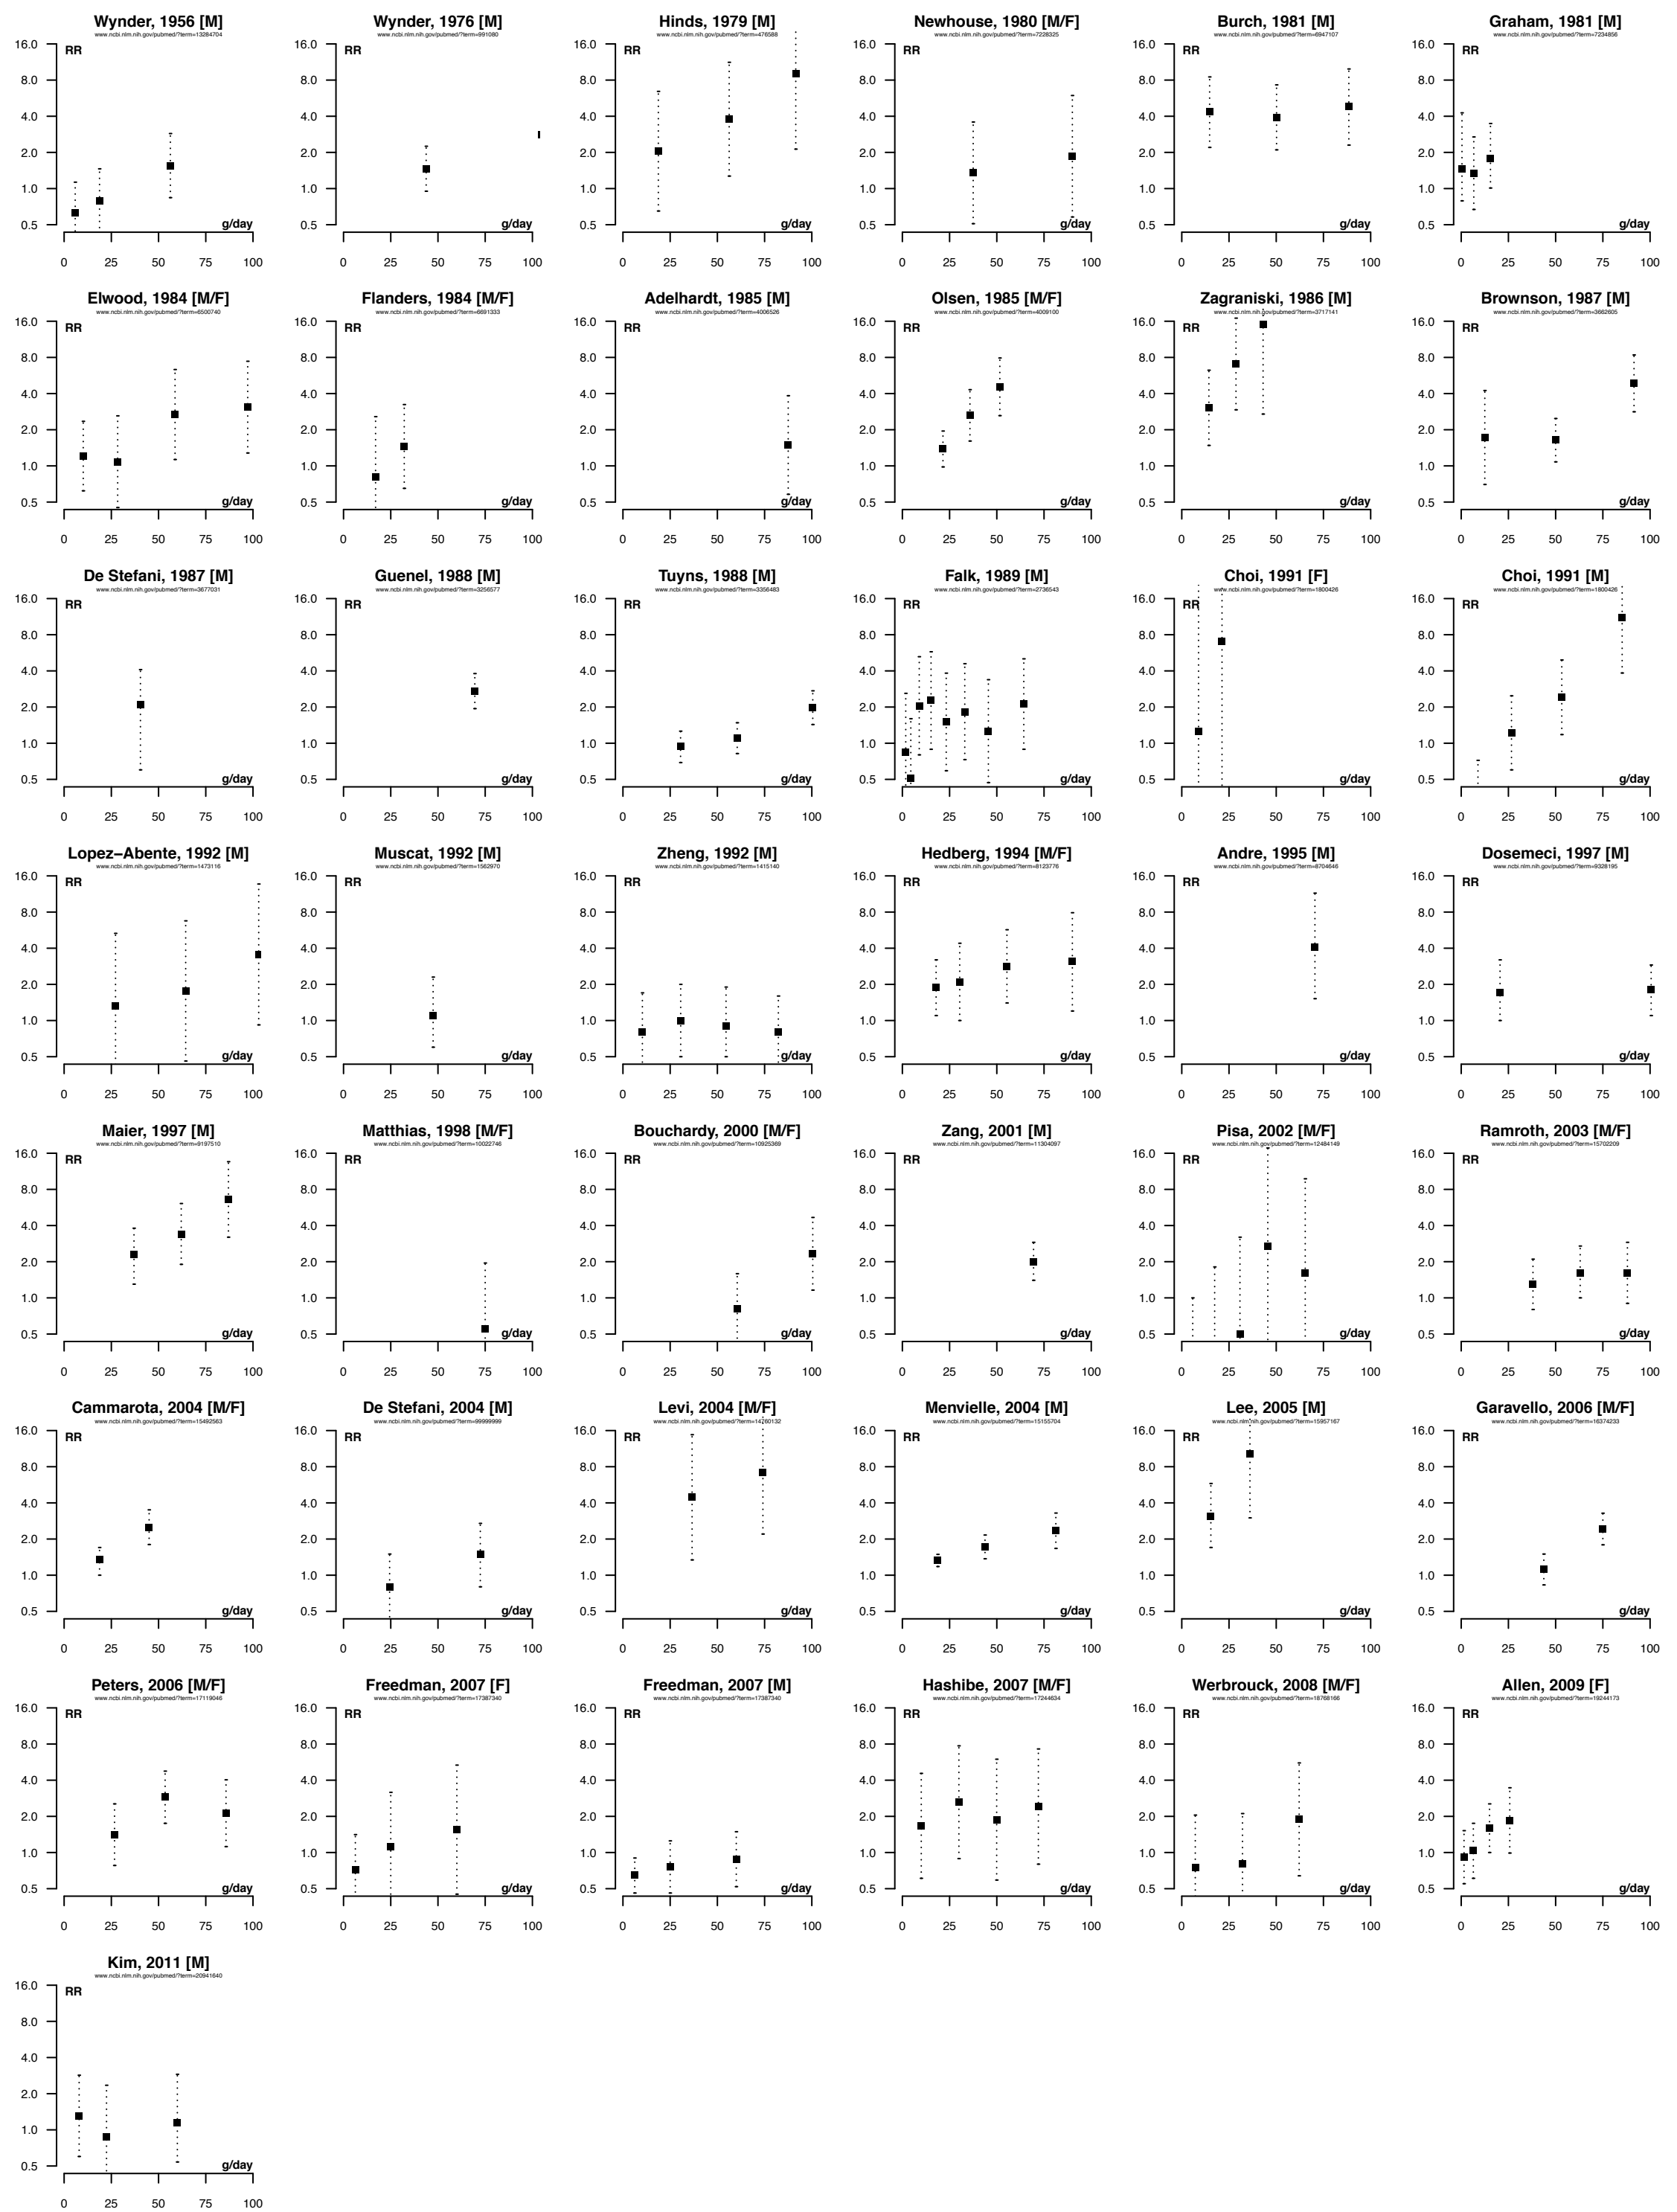

# Lung



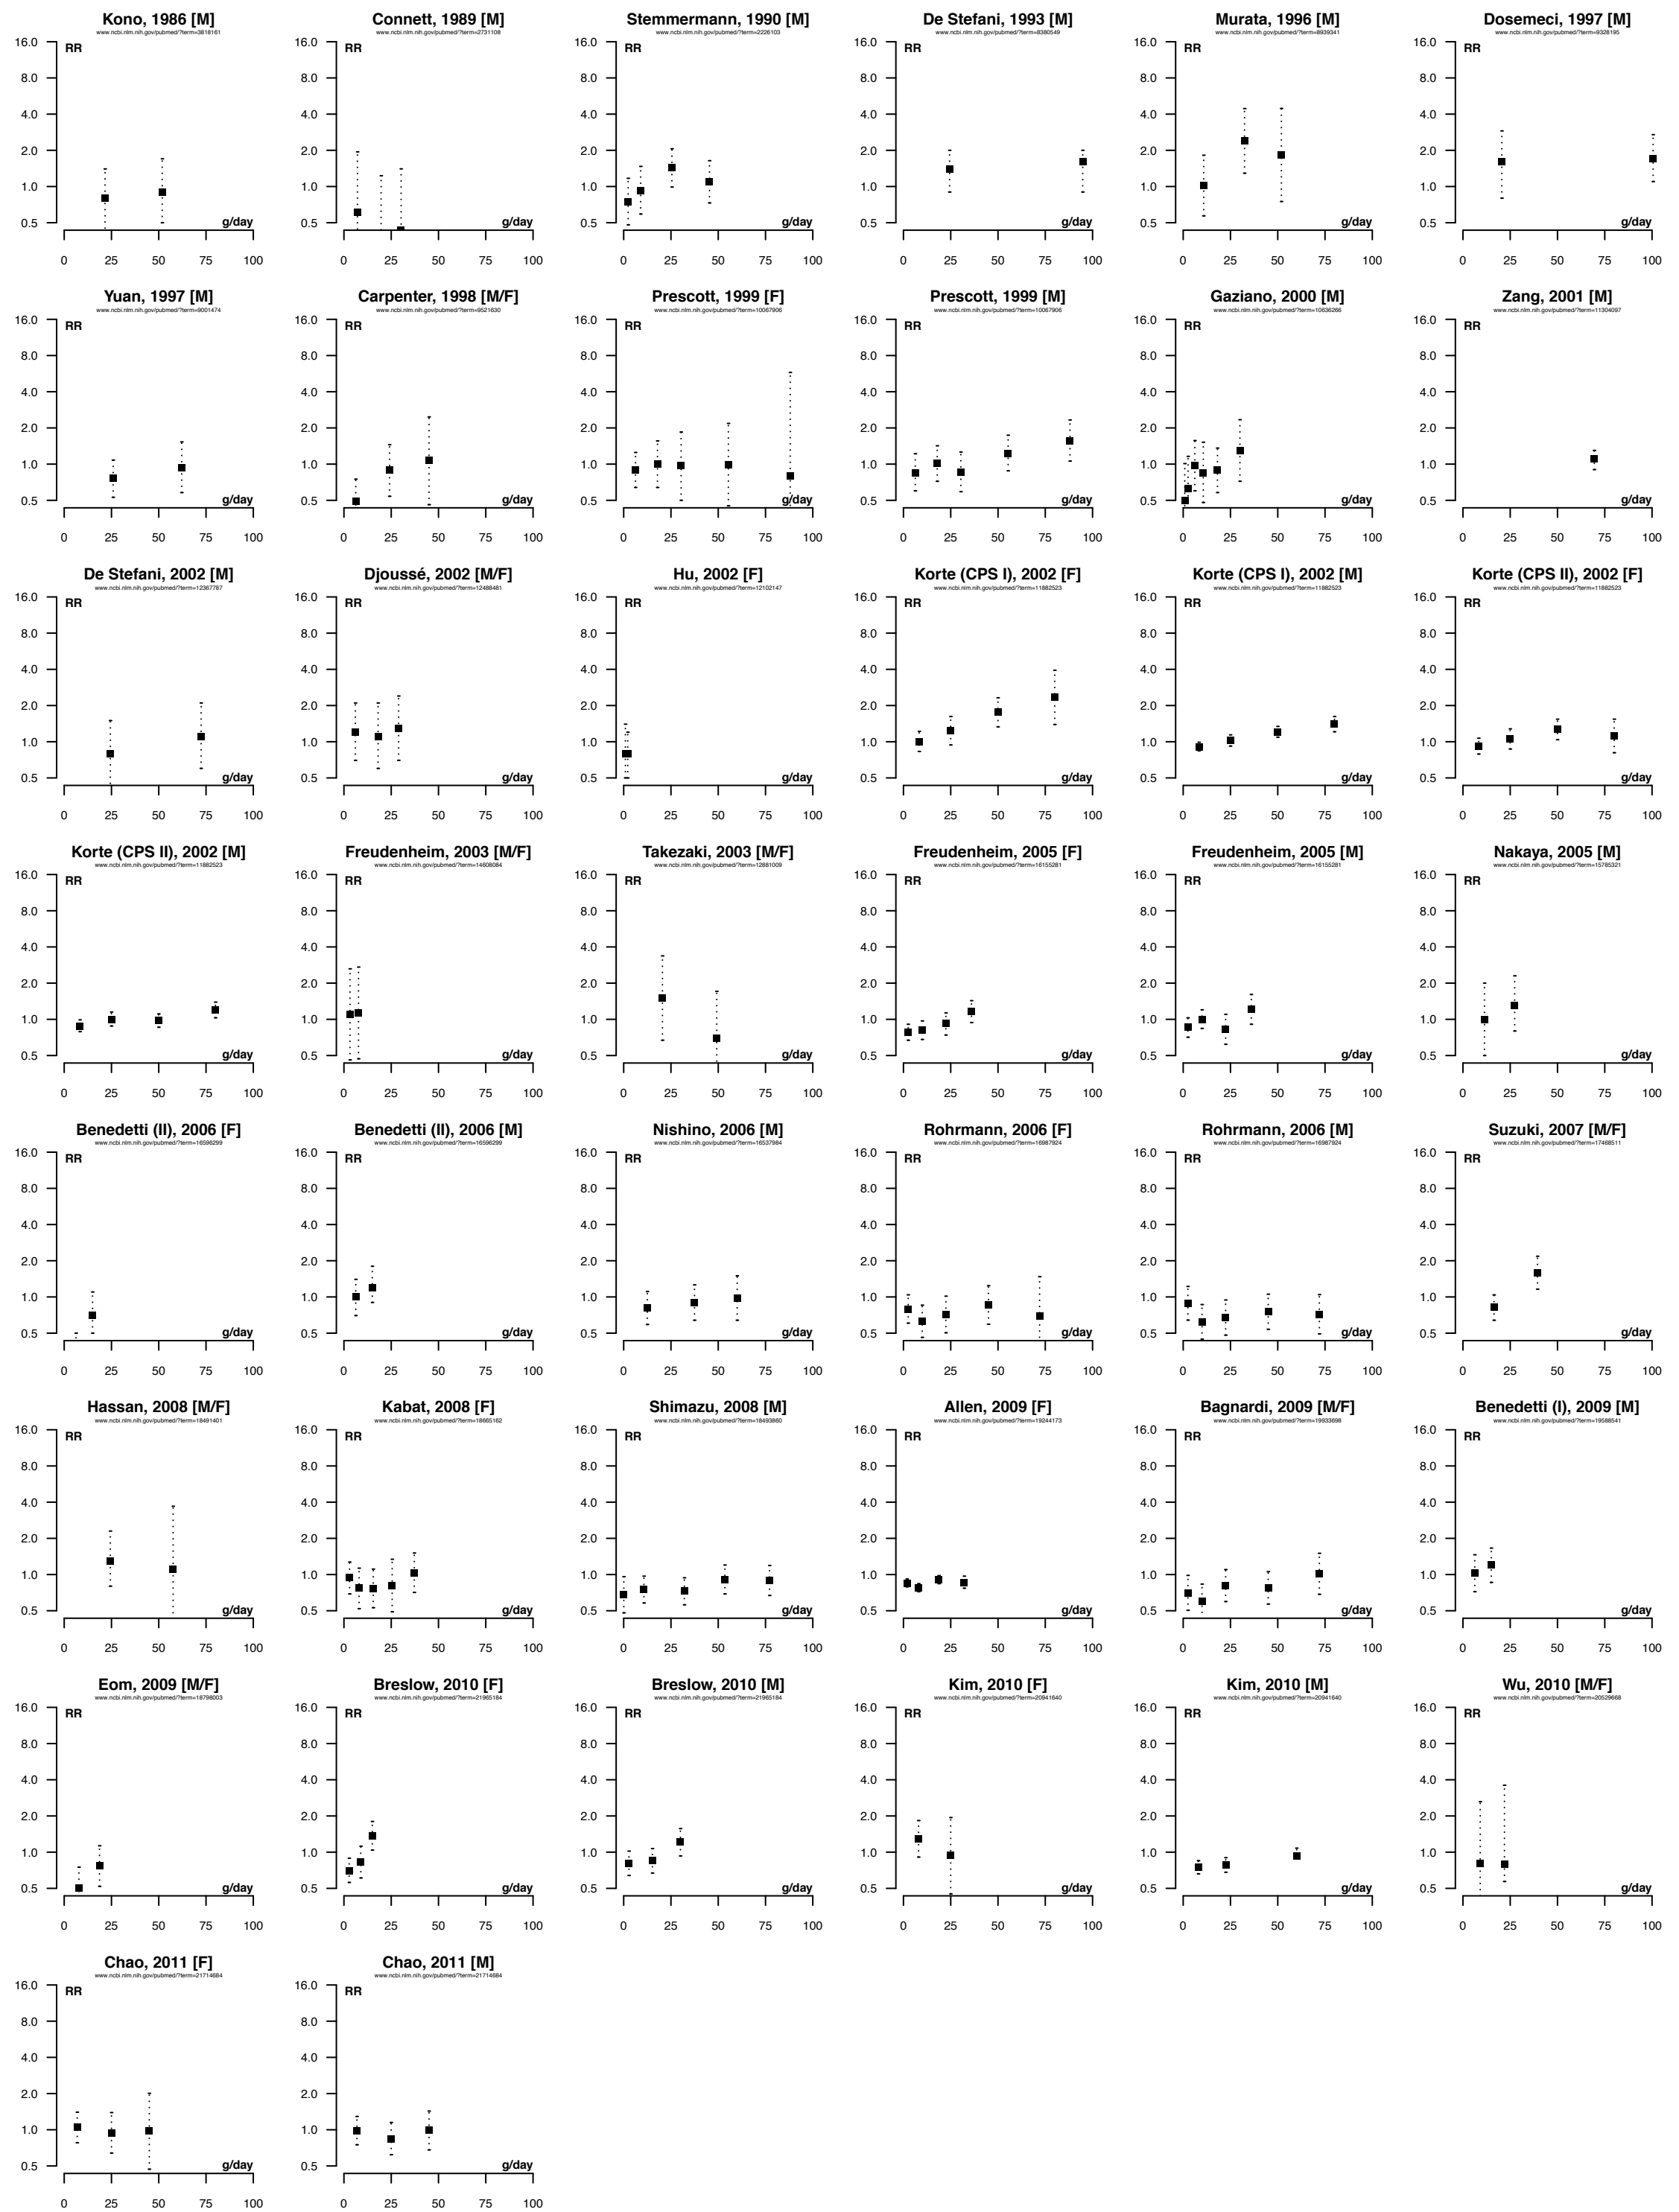

# **Malignant Melanoma**

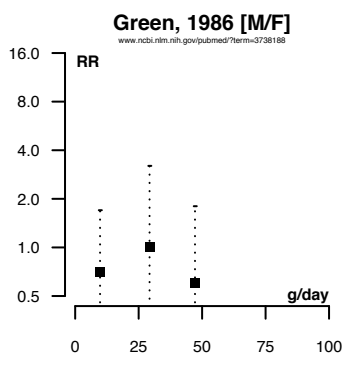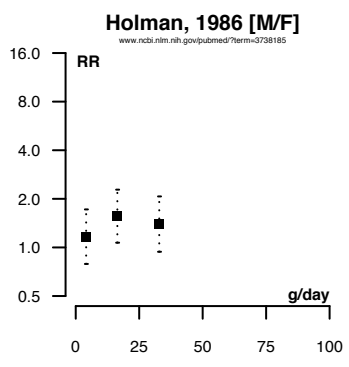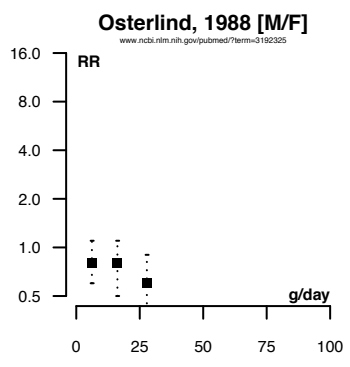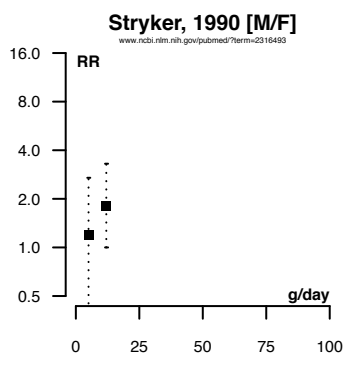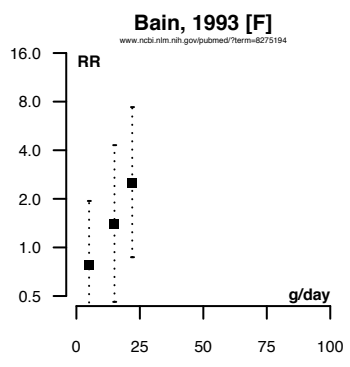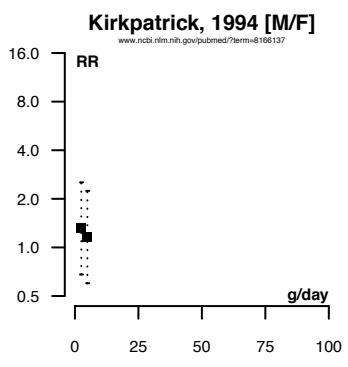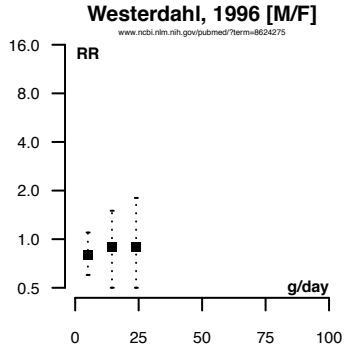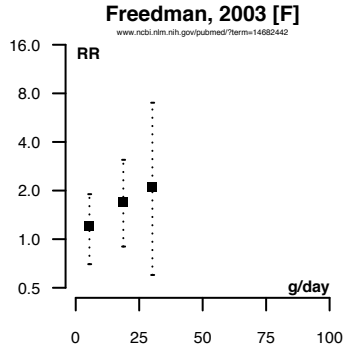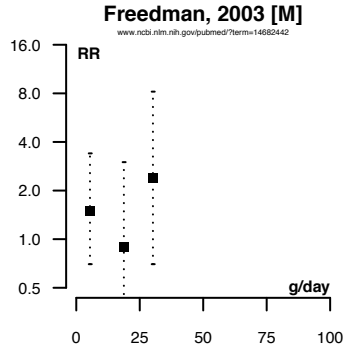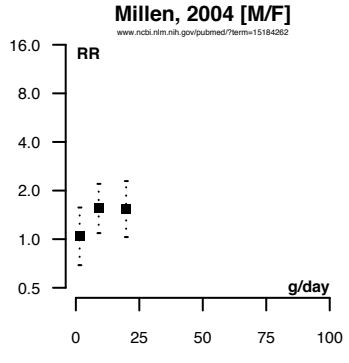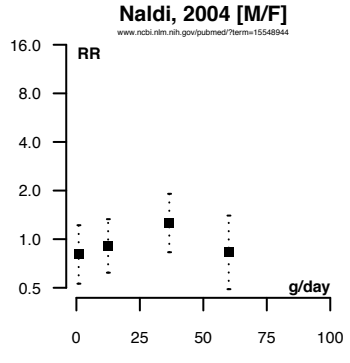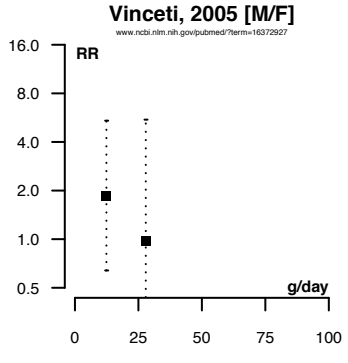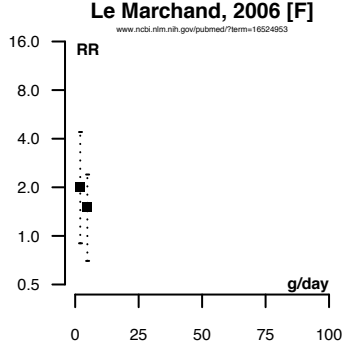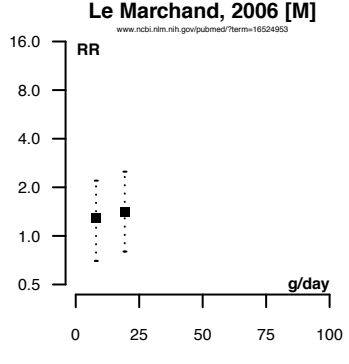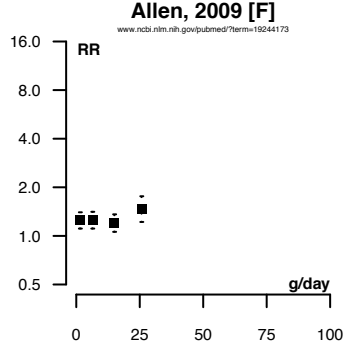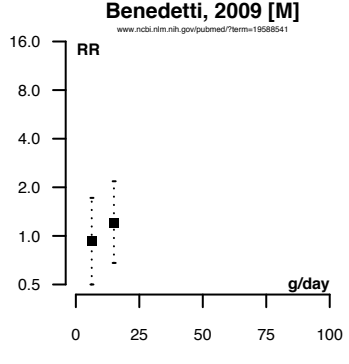

## **Breast (female)**

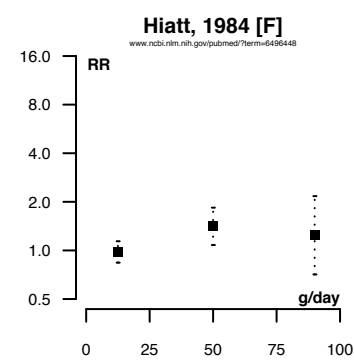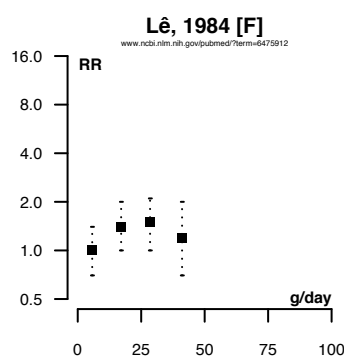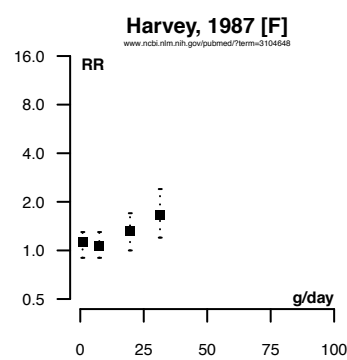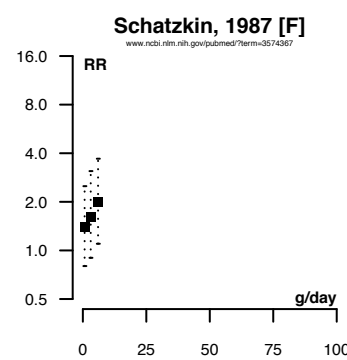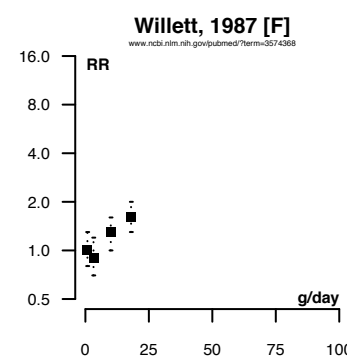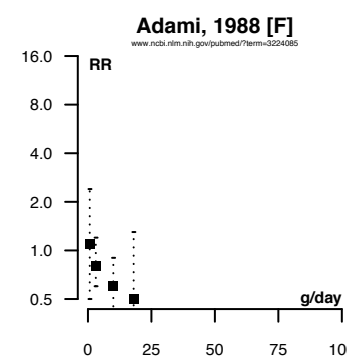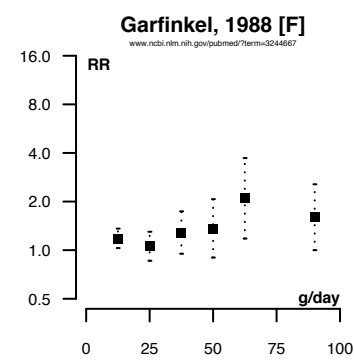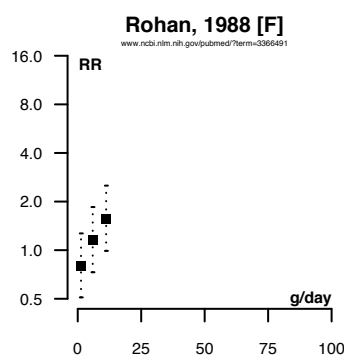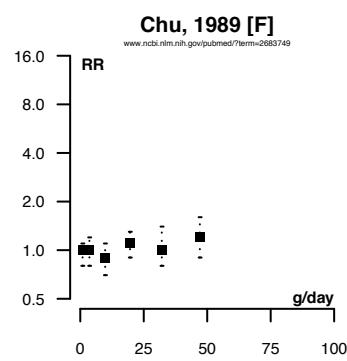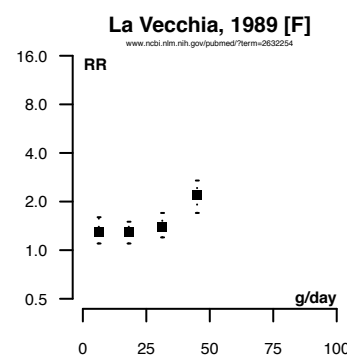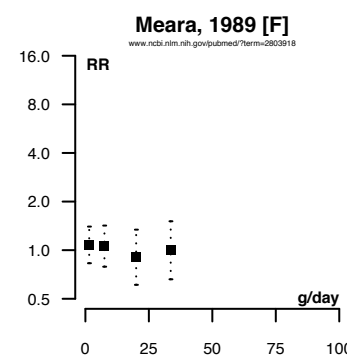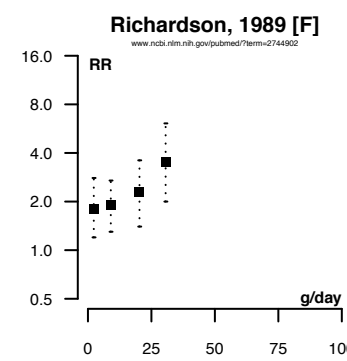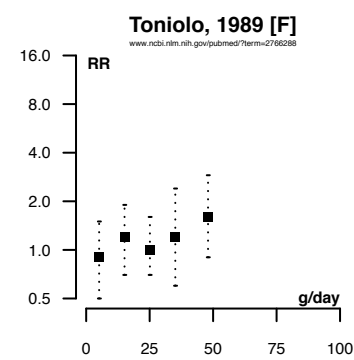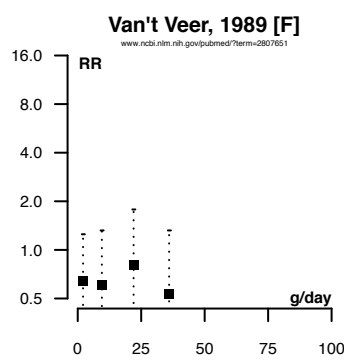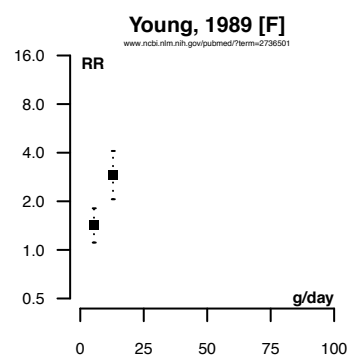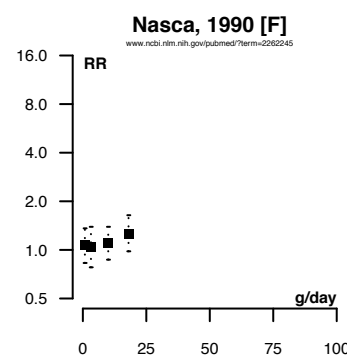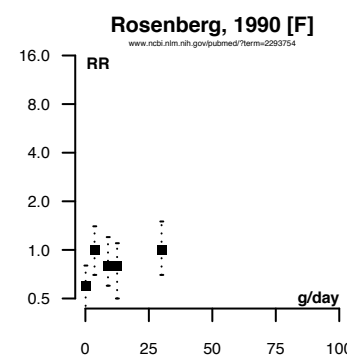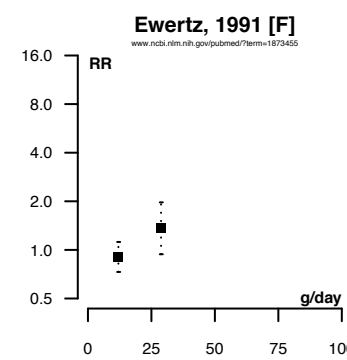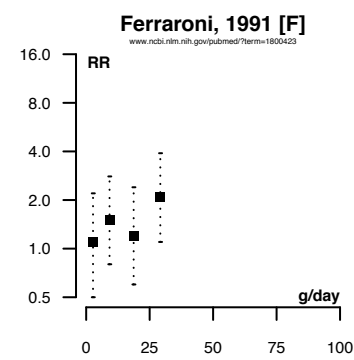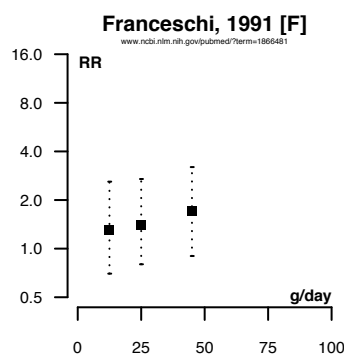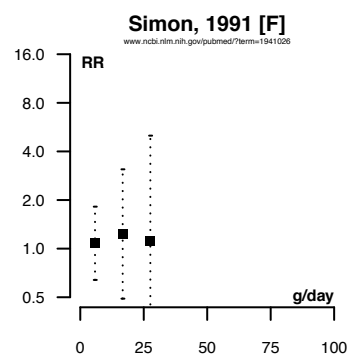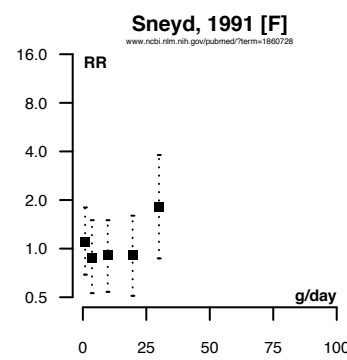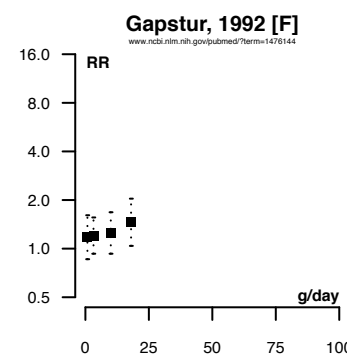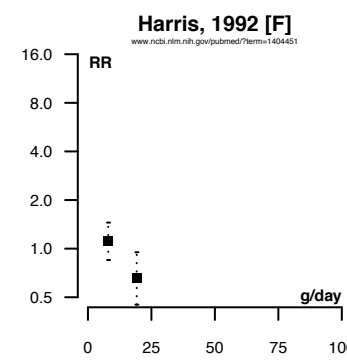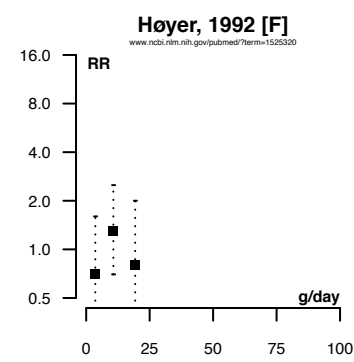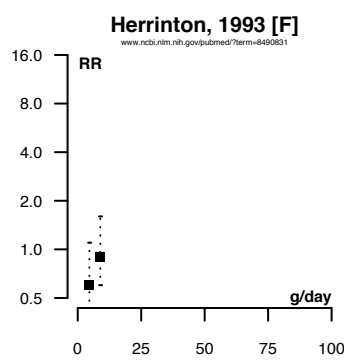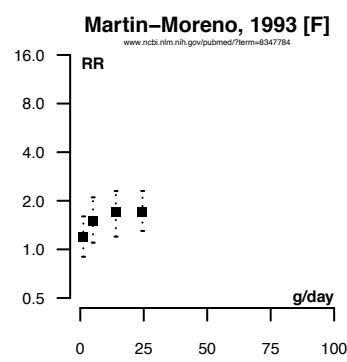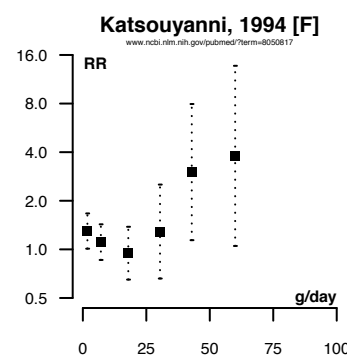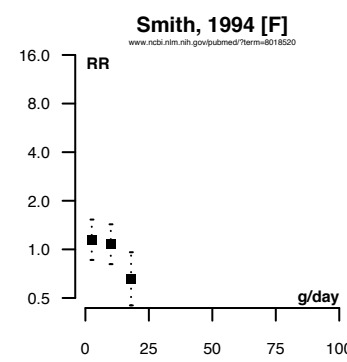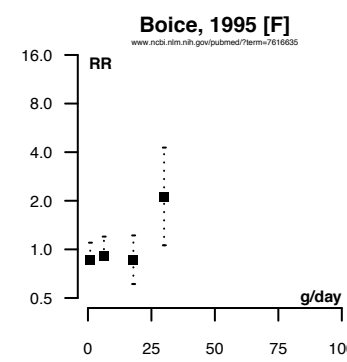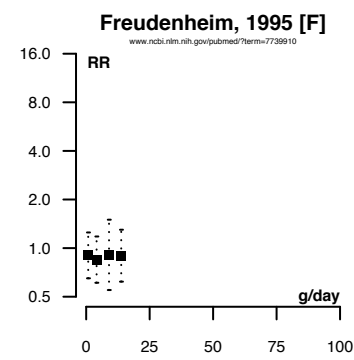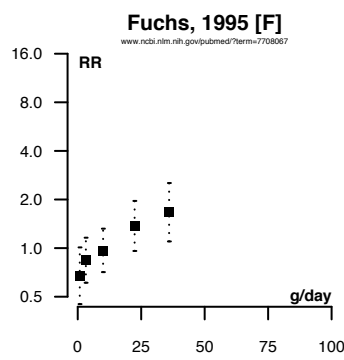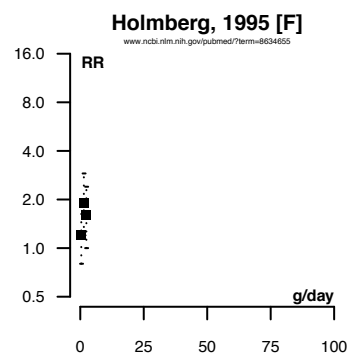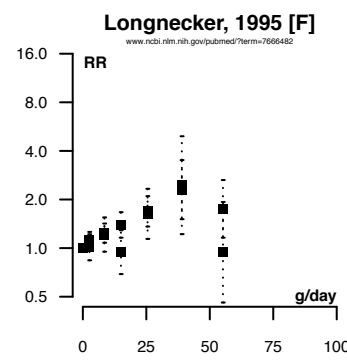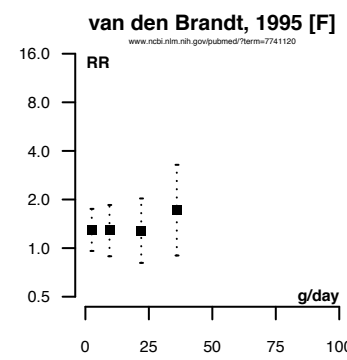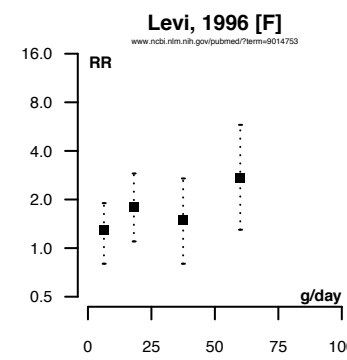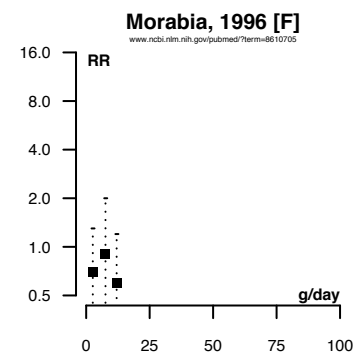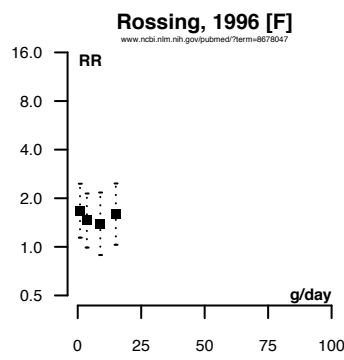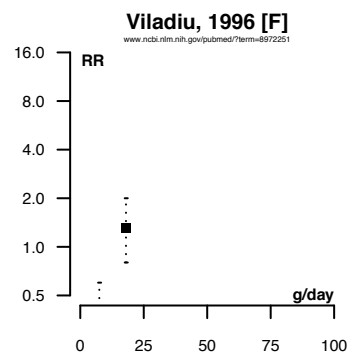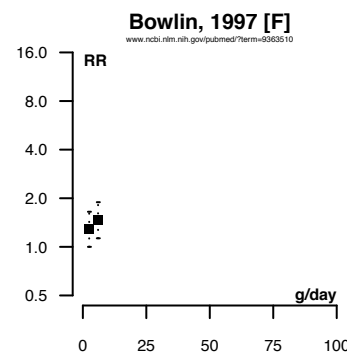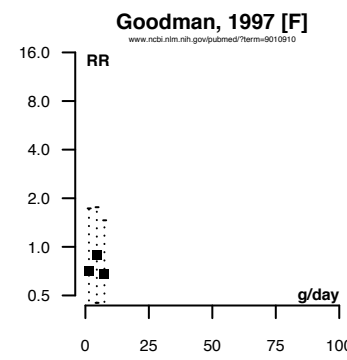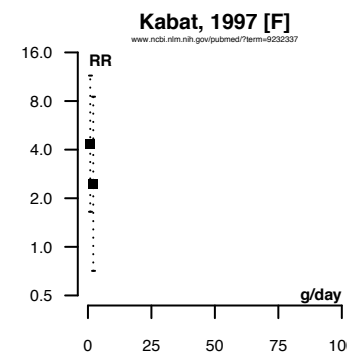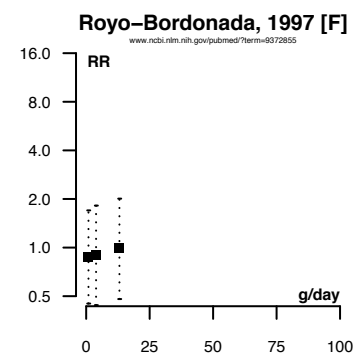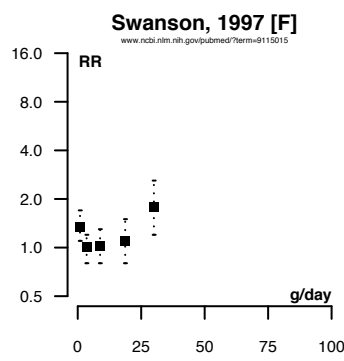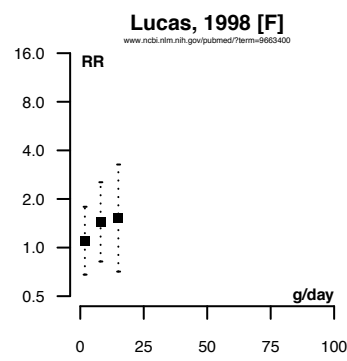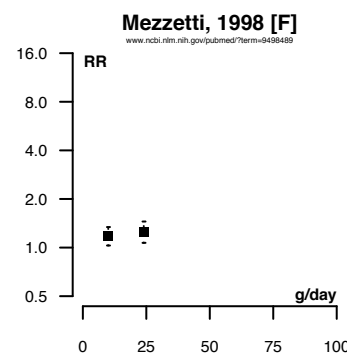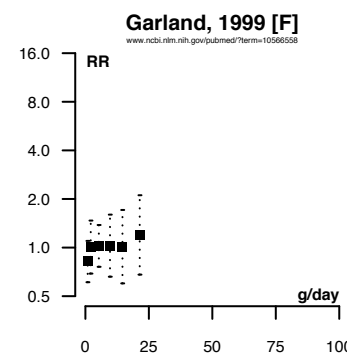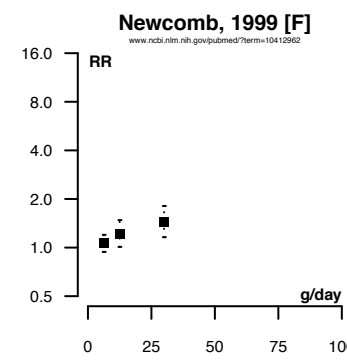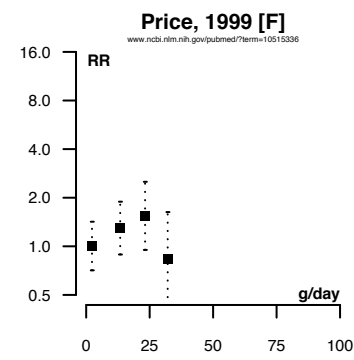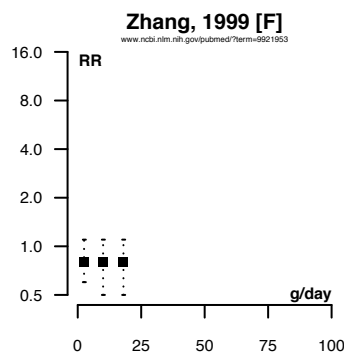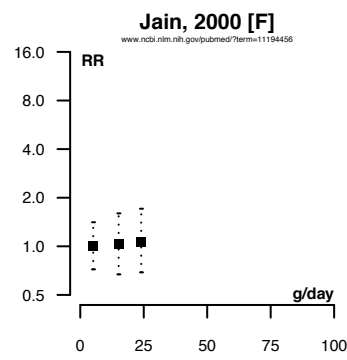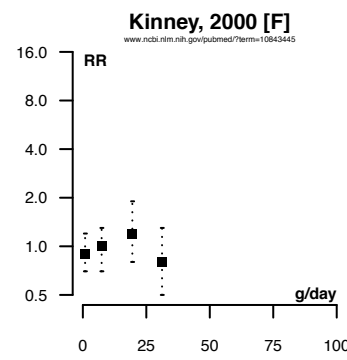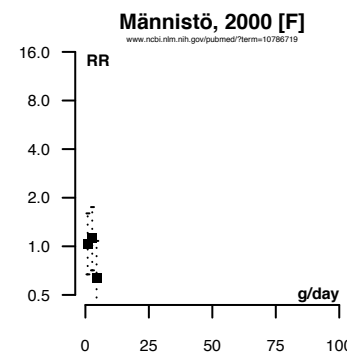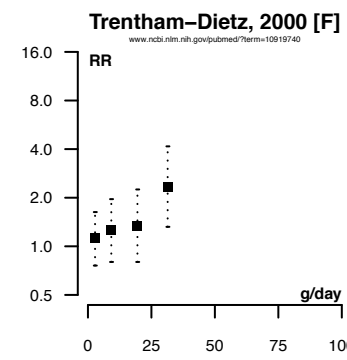

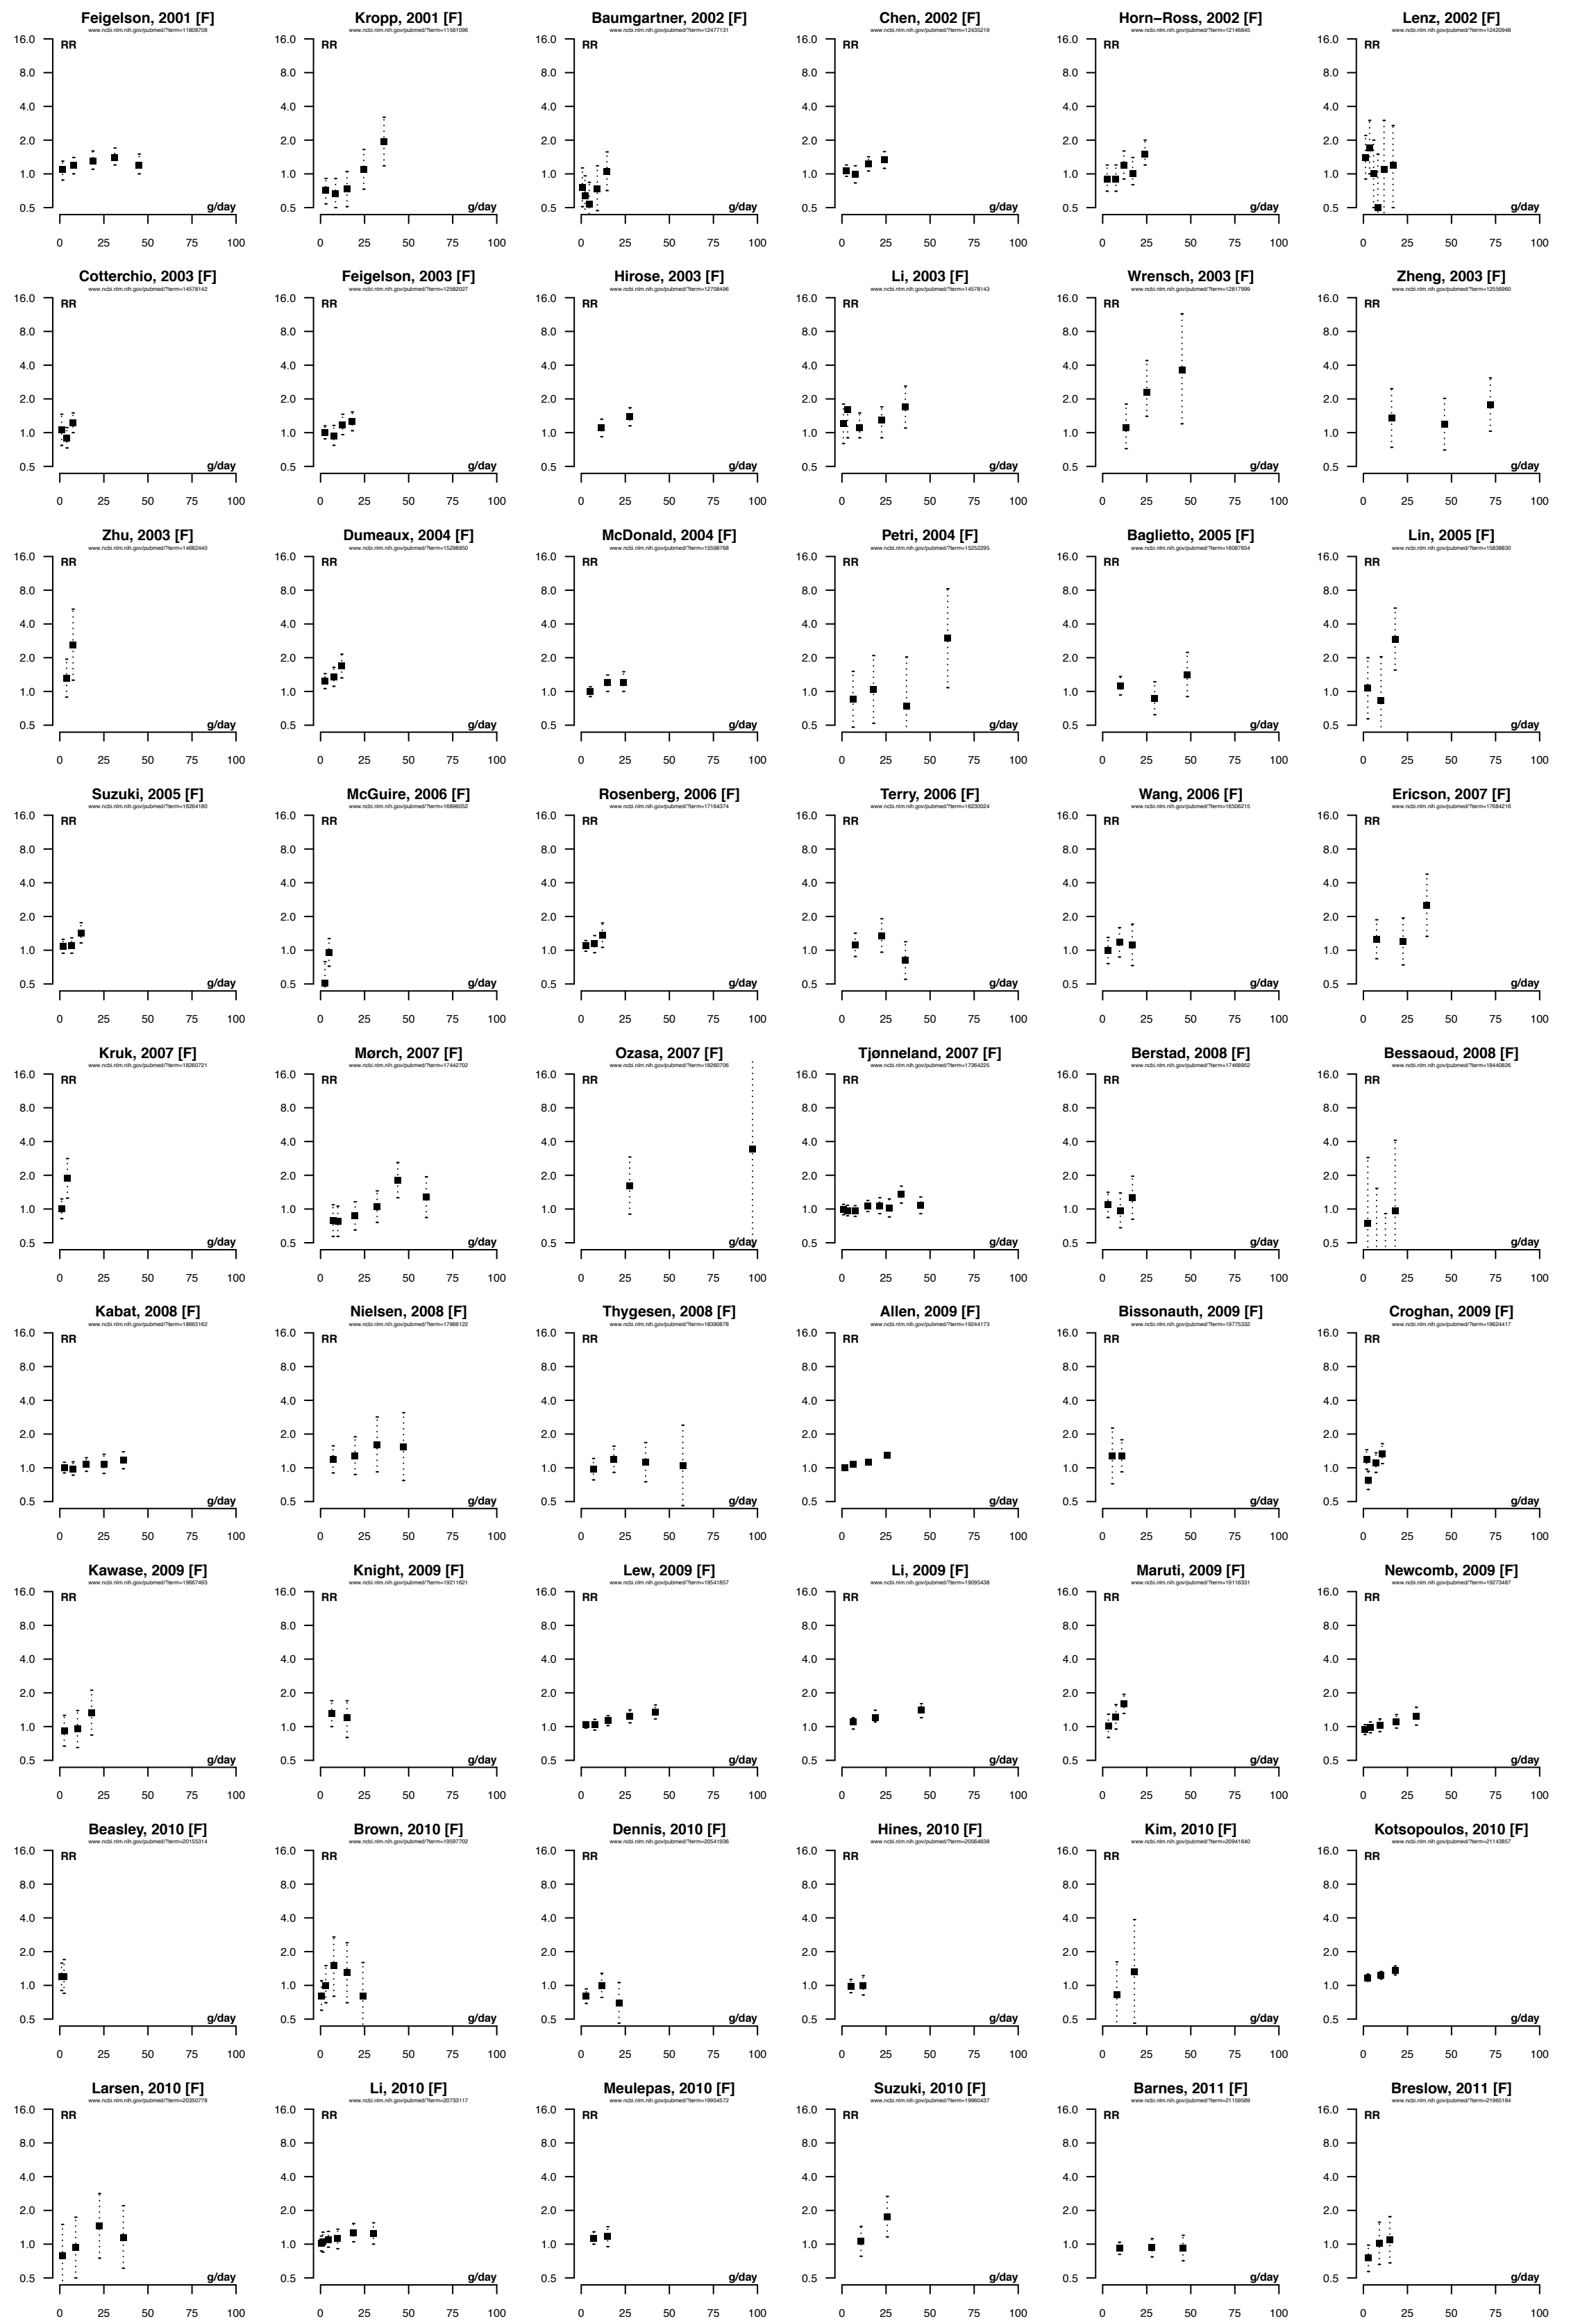

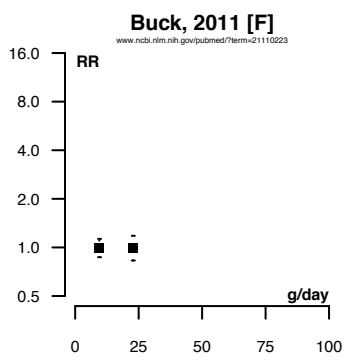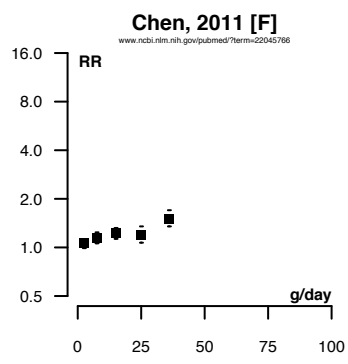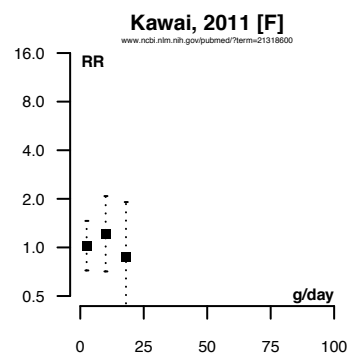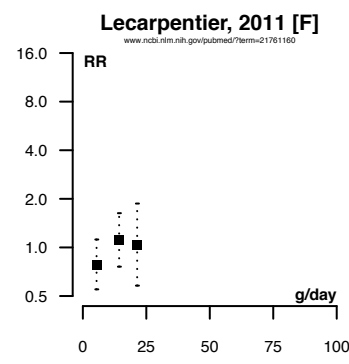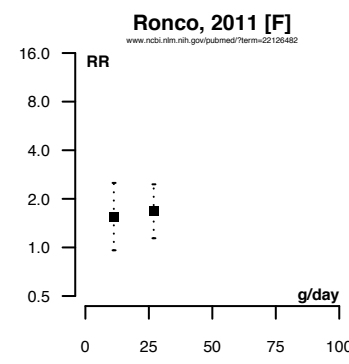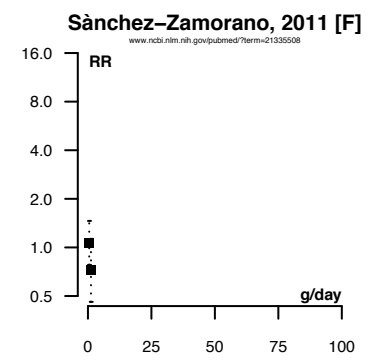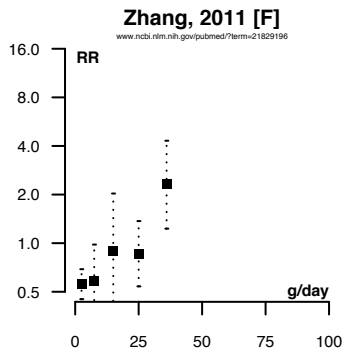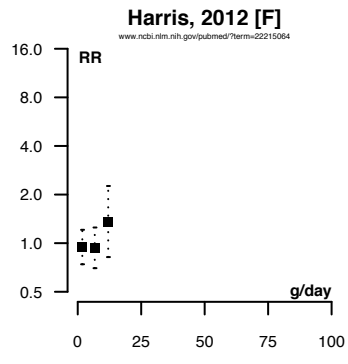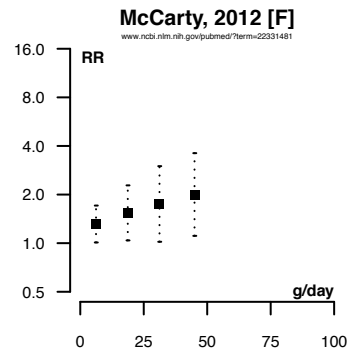

# **Cervix**



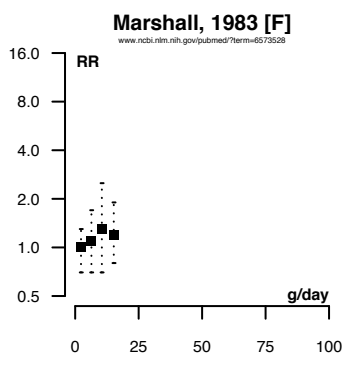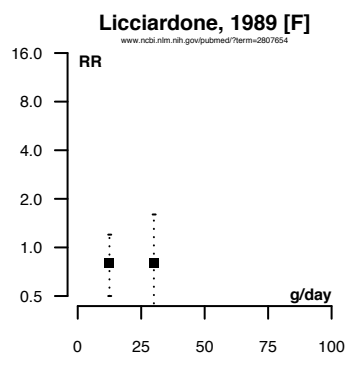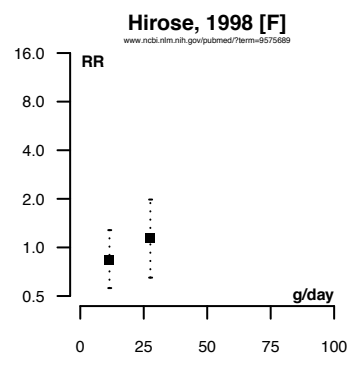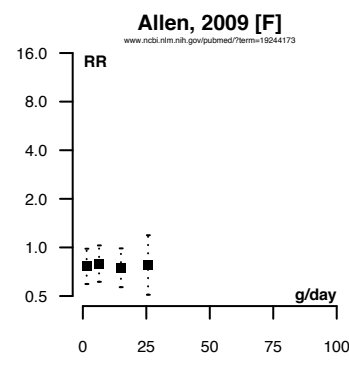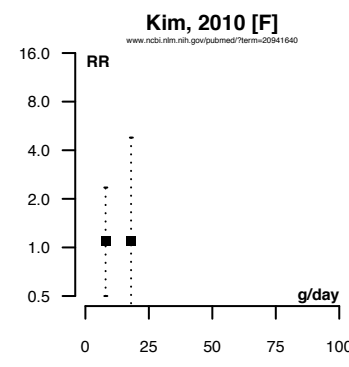

# **Endometrium**

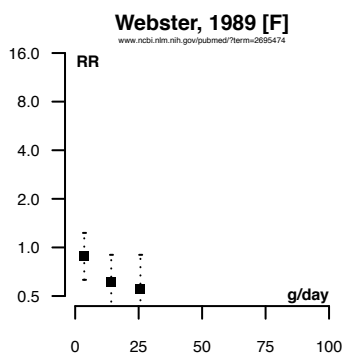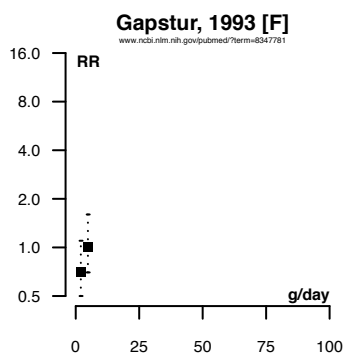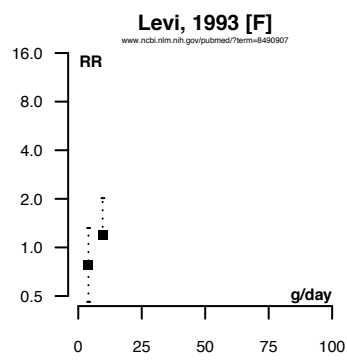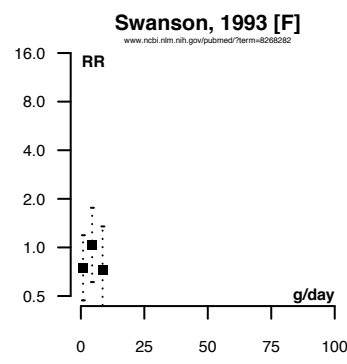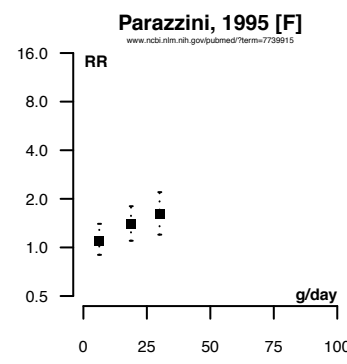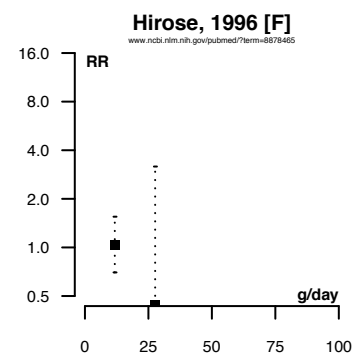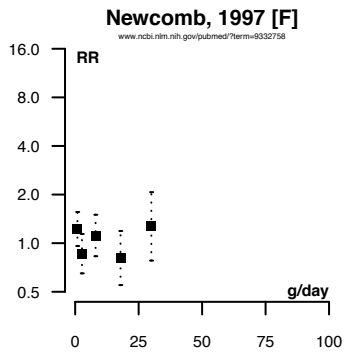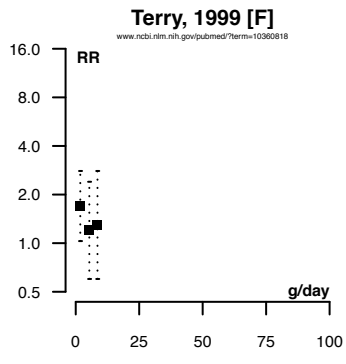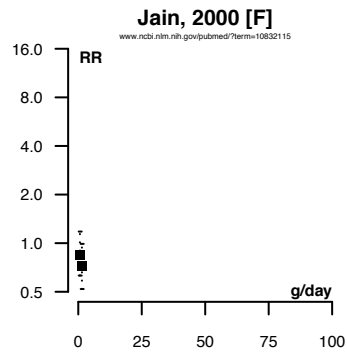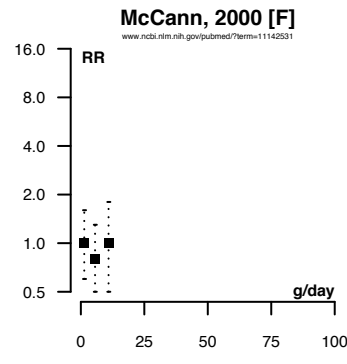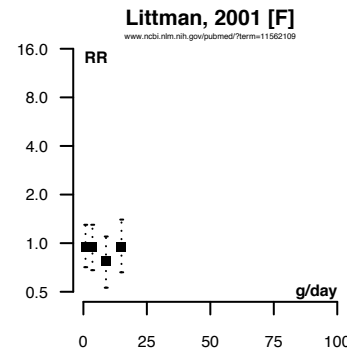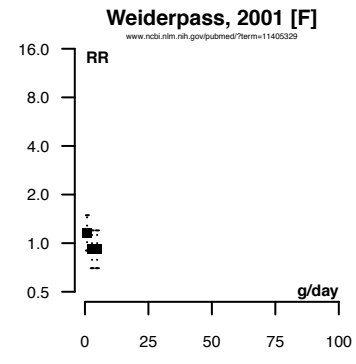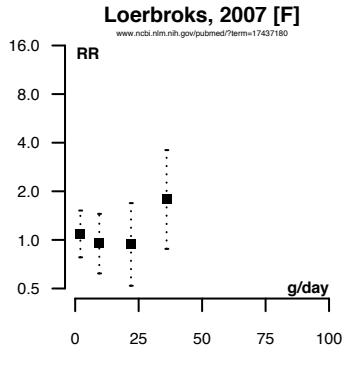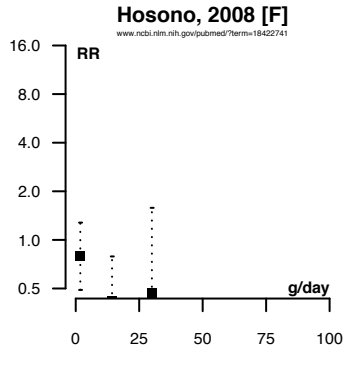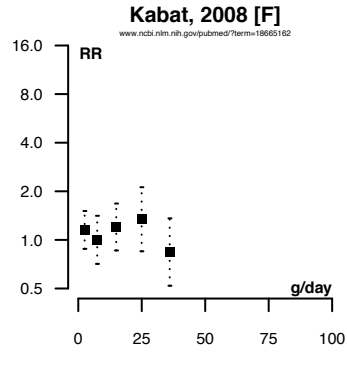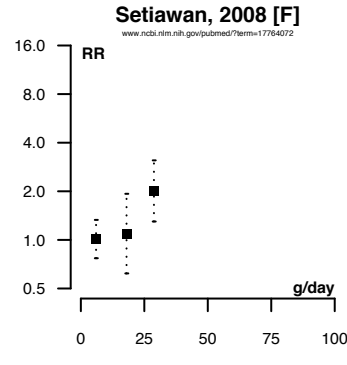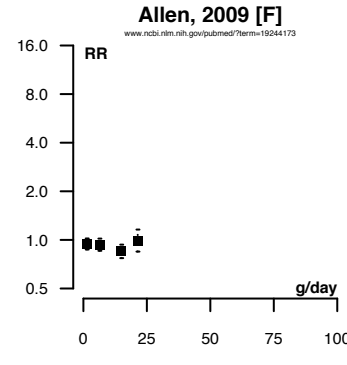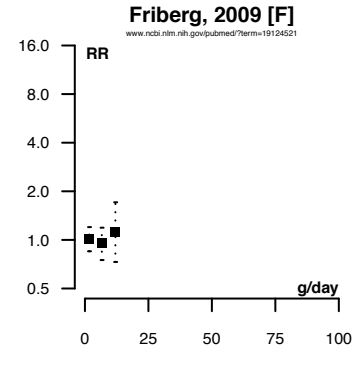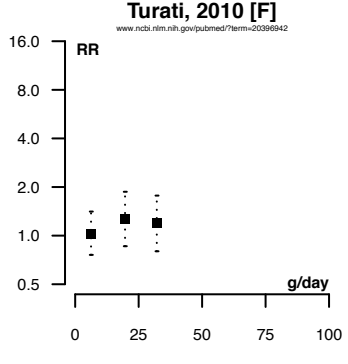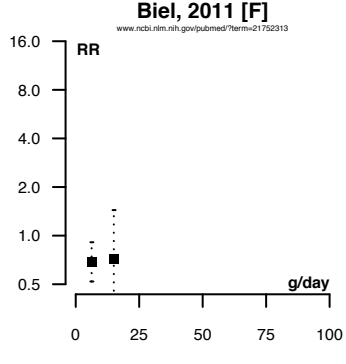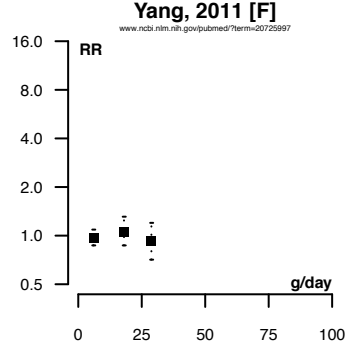

# Ovary

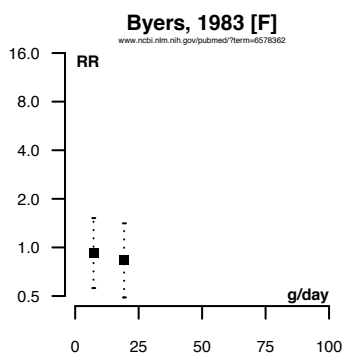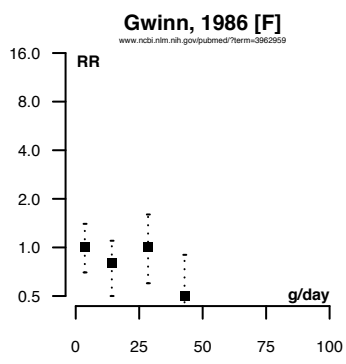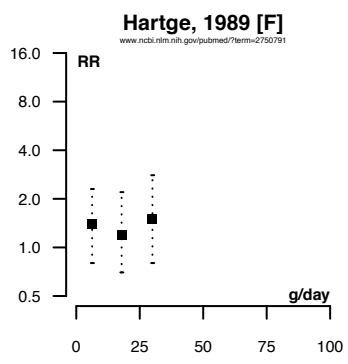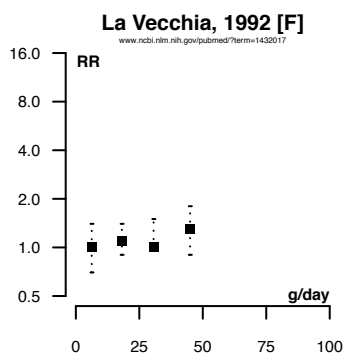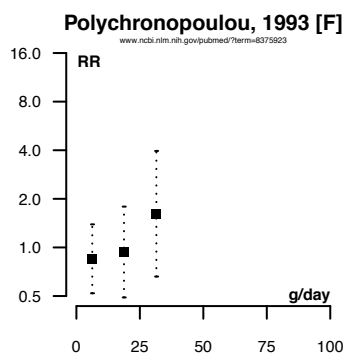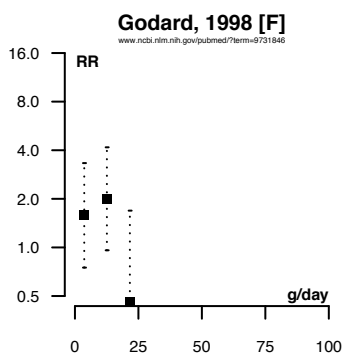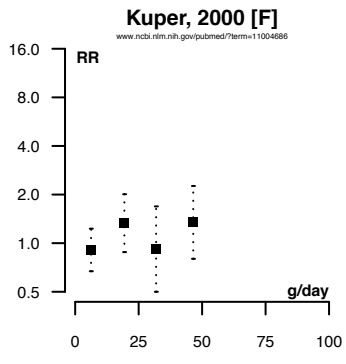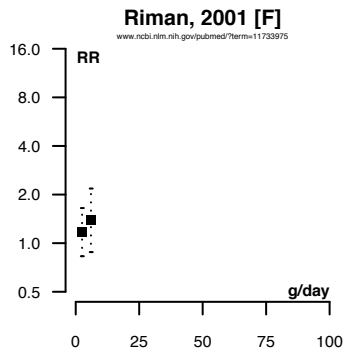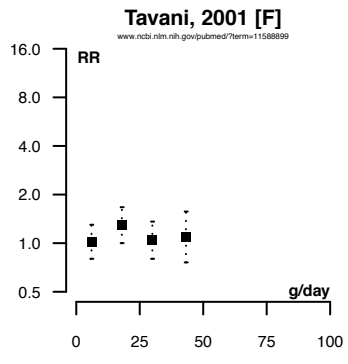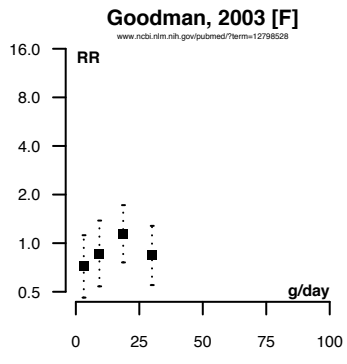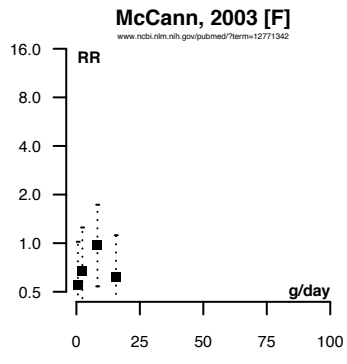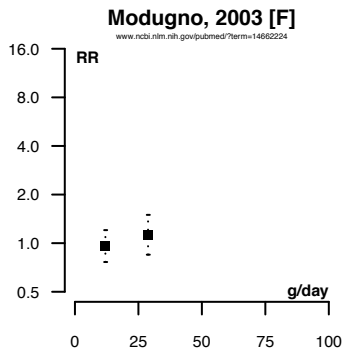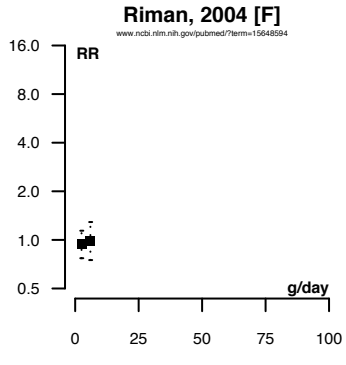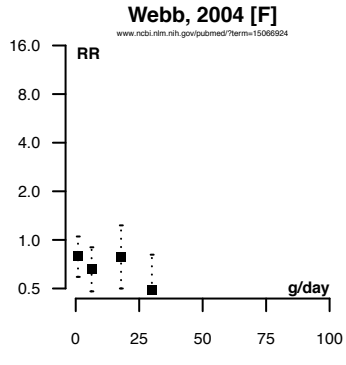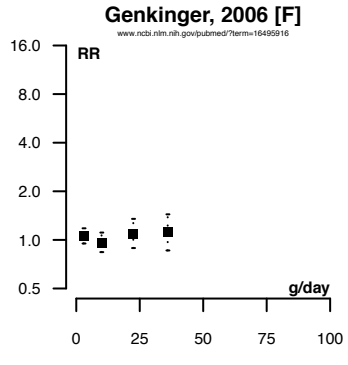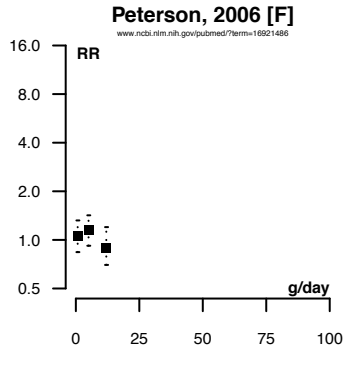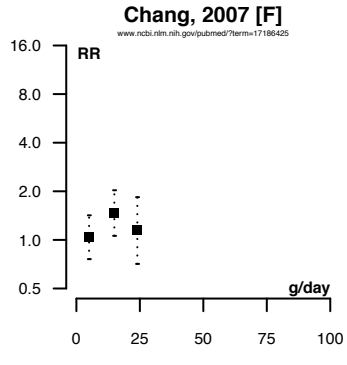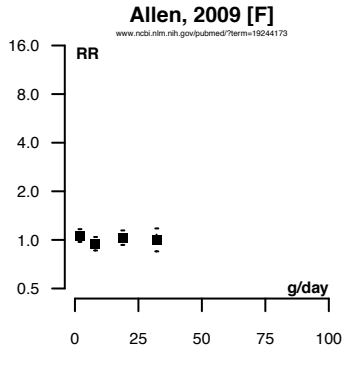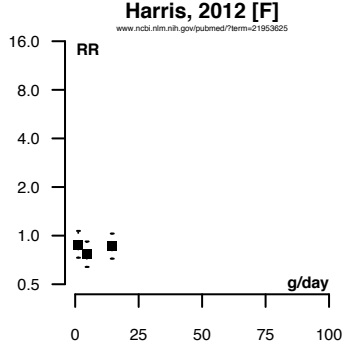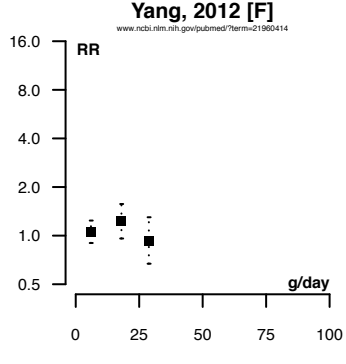

# Prostate

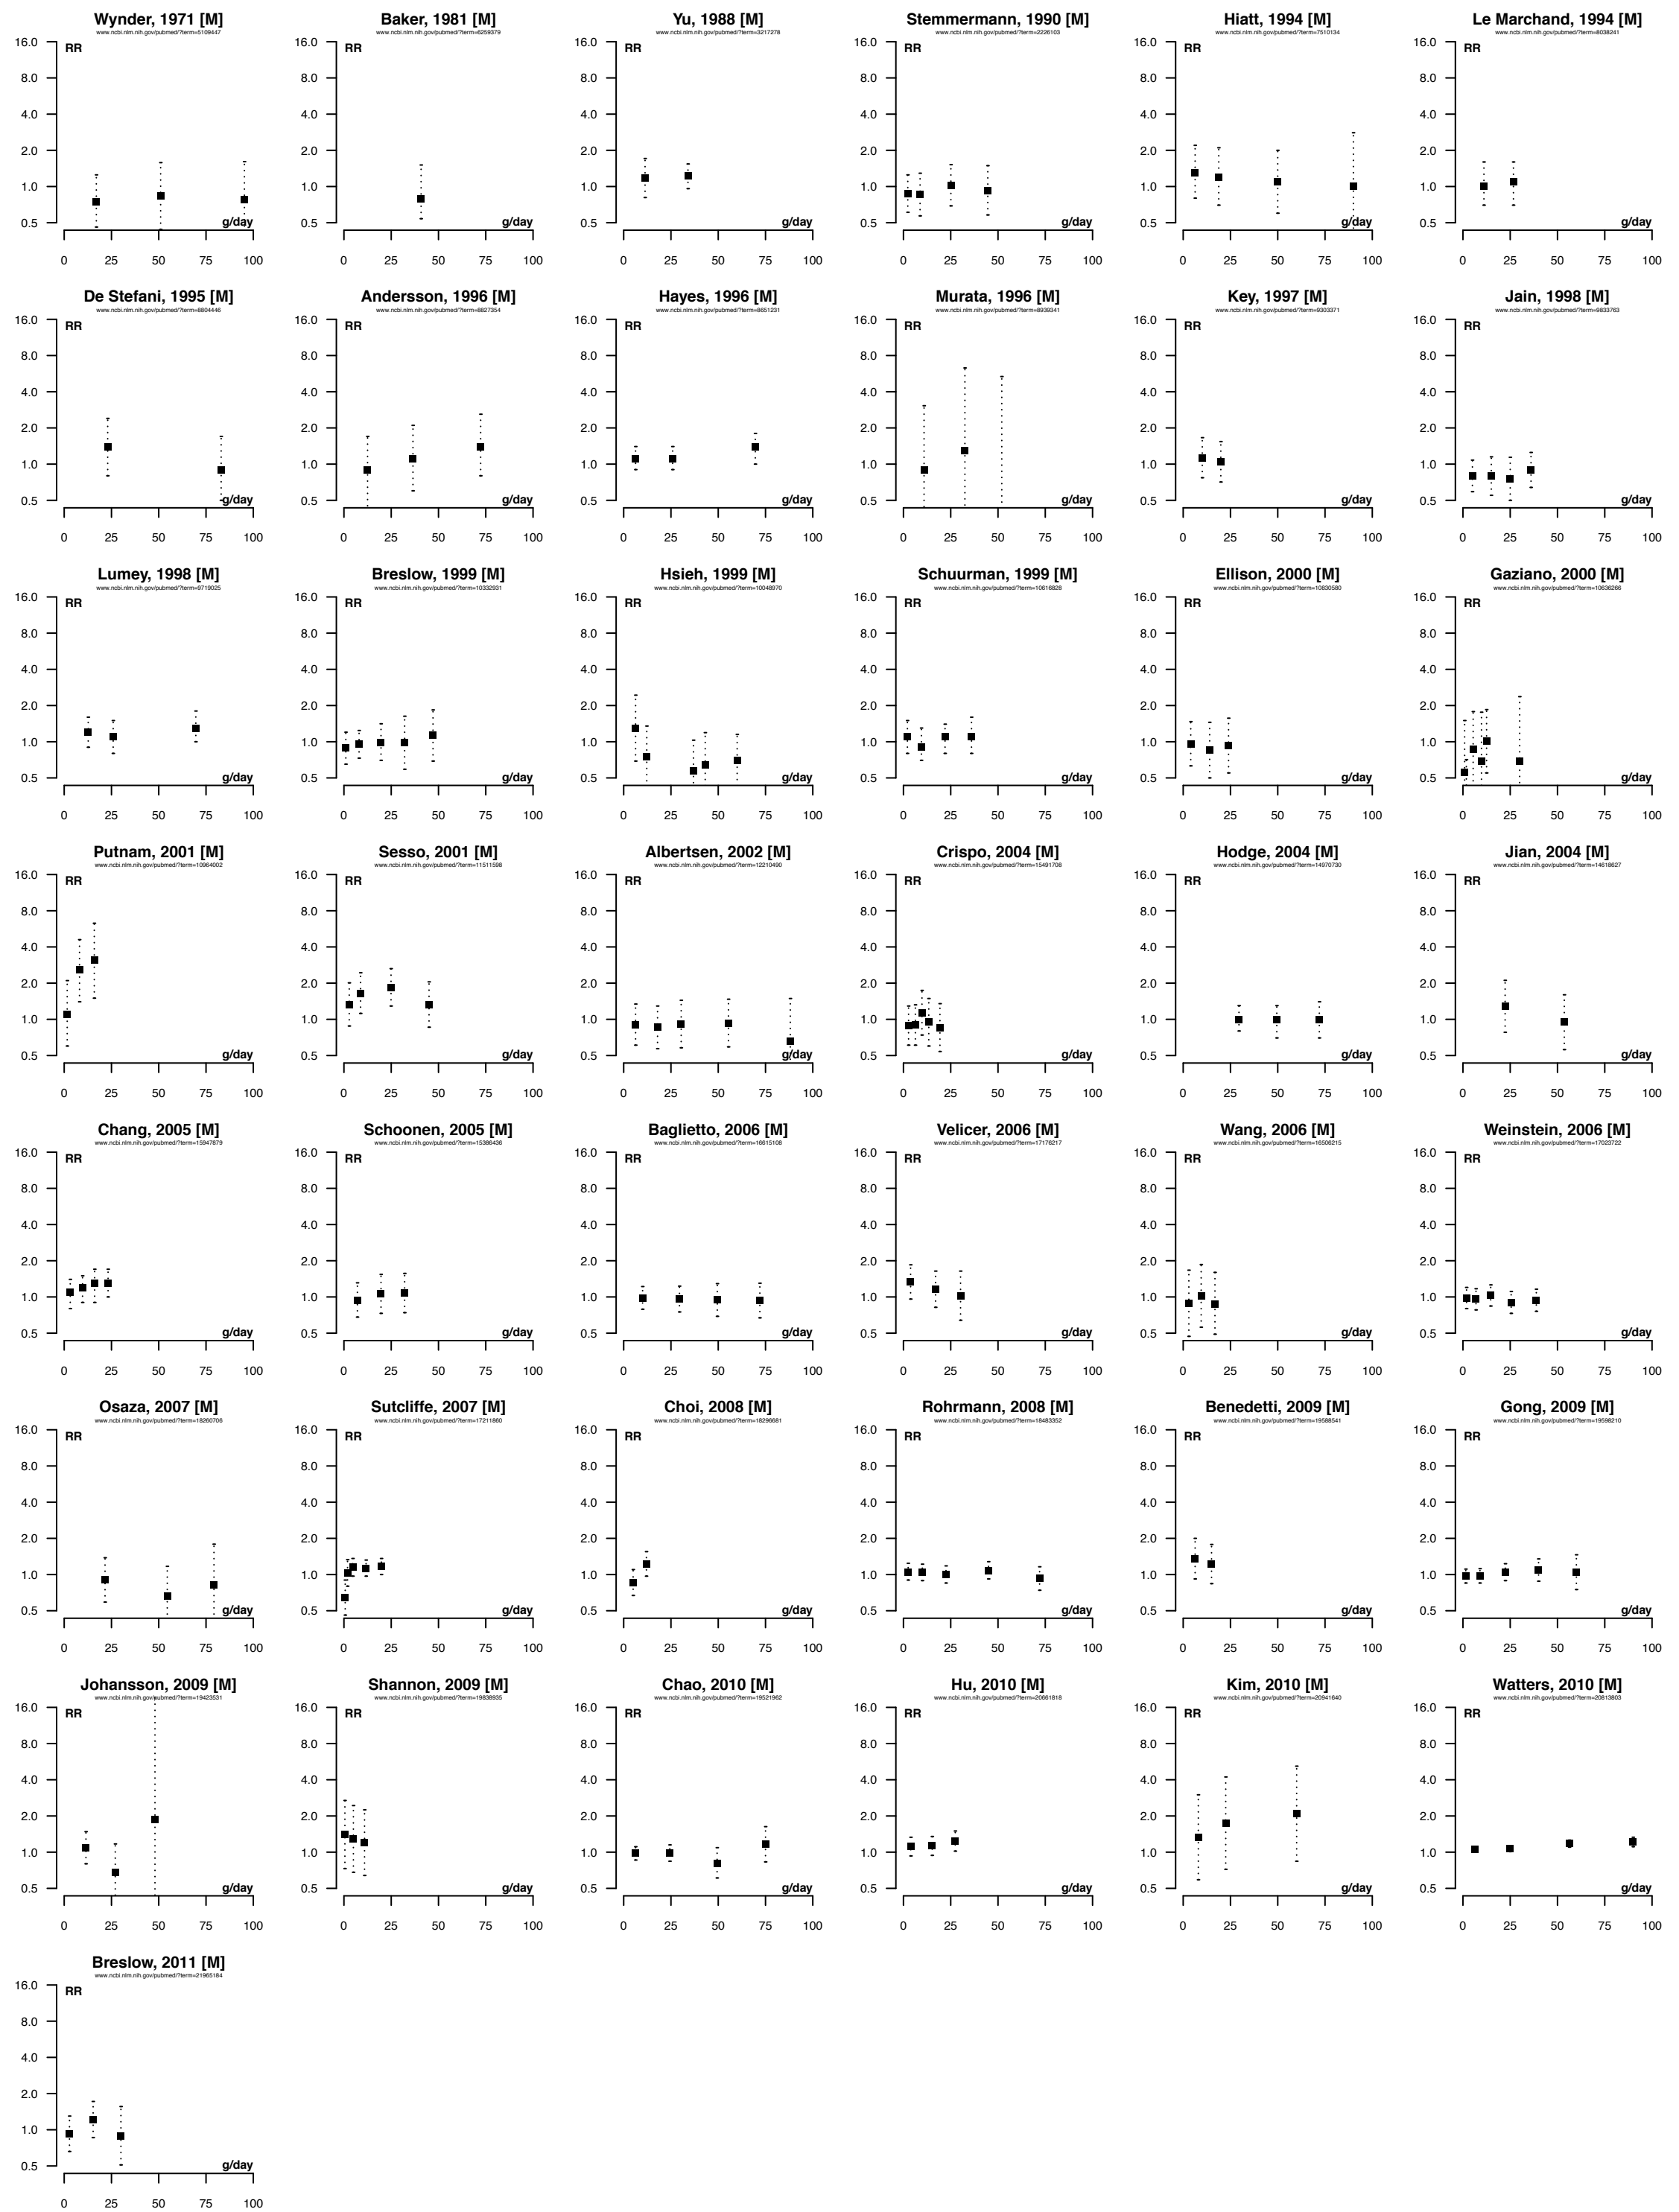

# Bladder



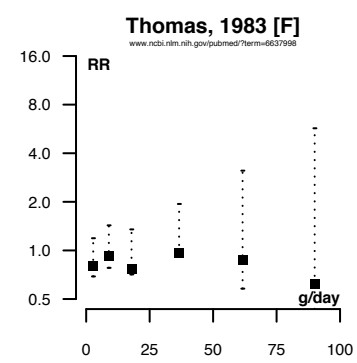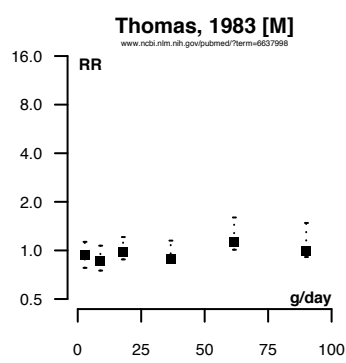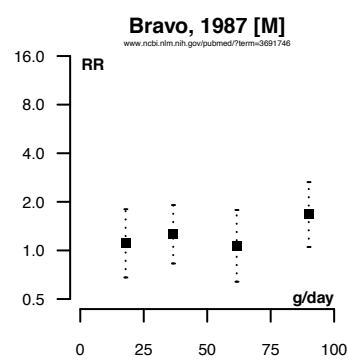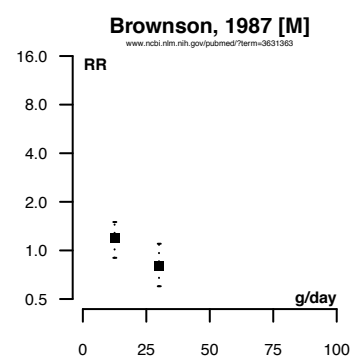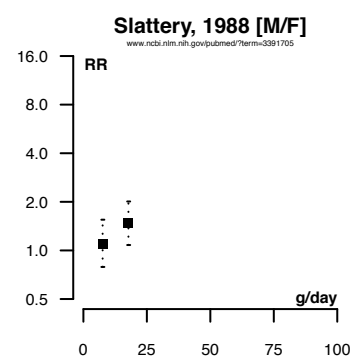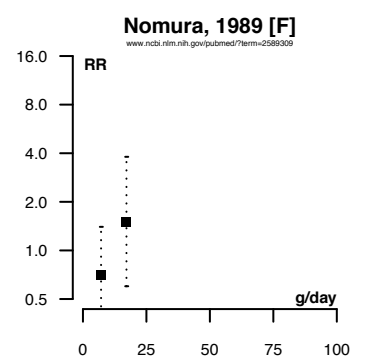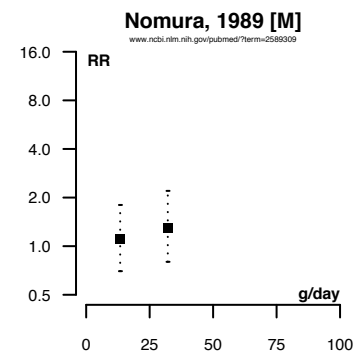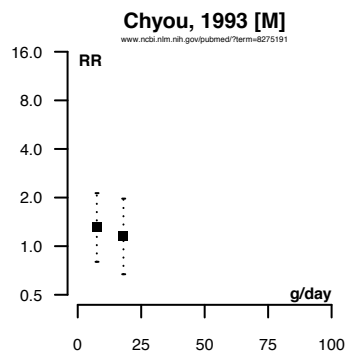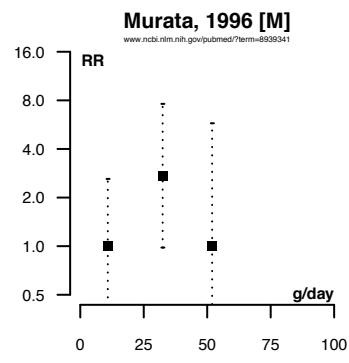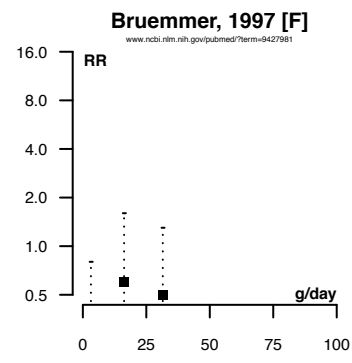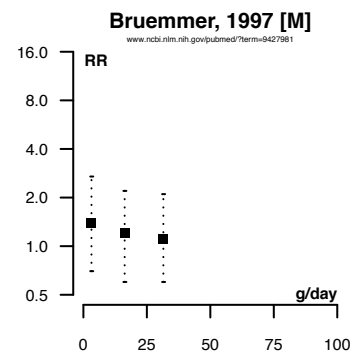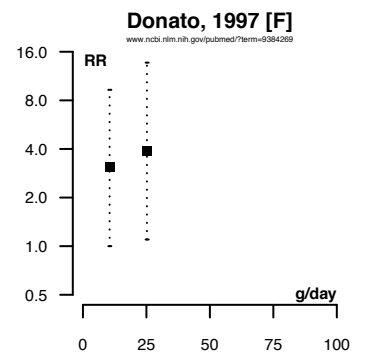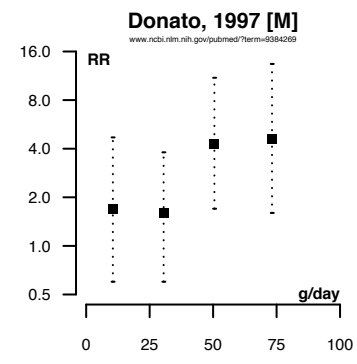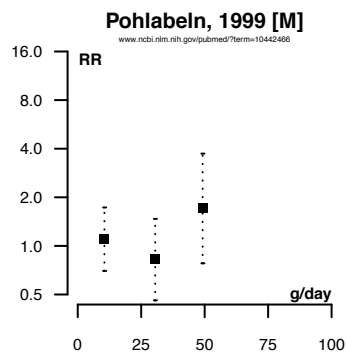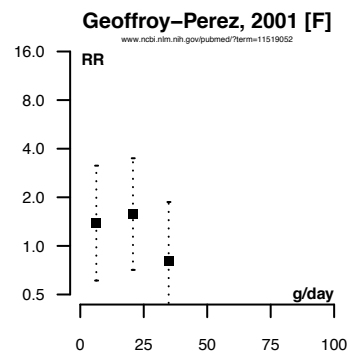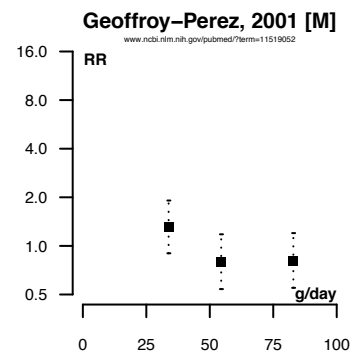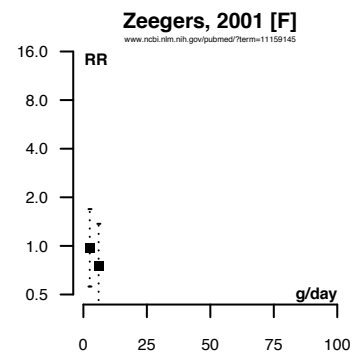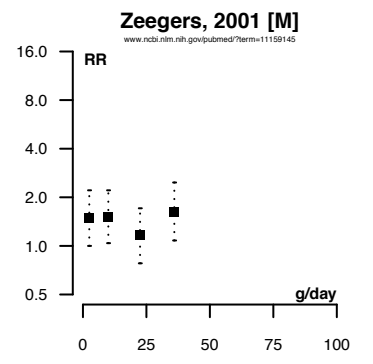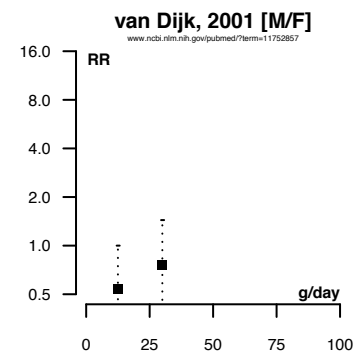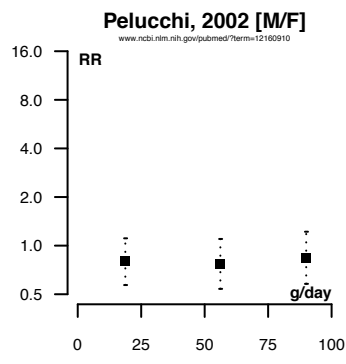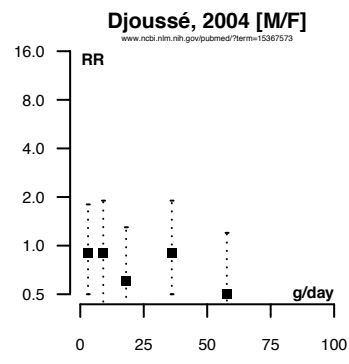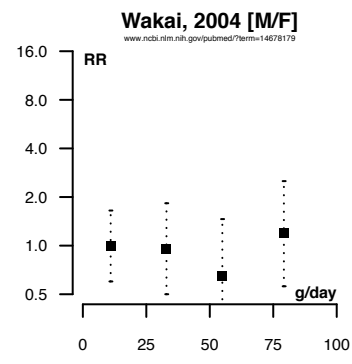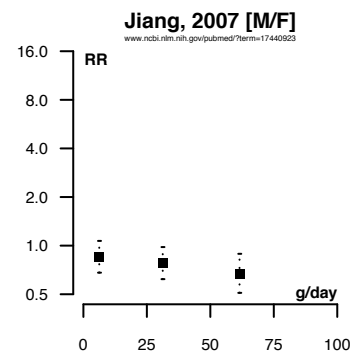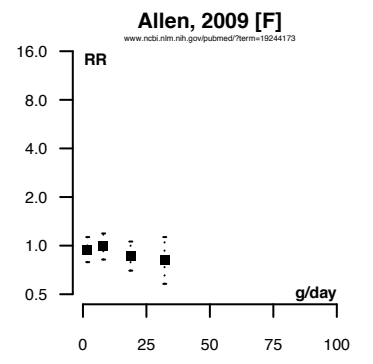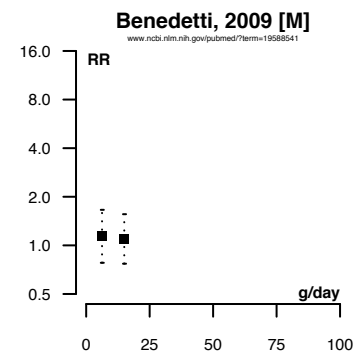

# Kidney

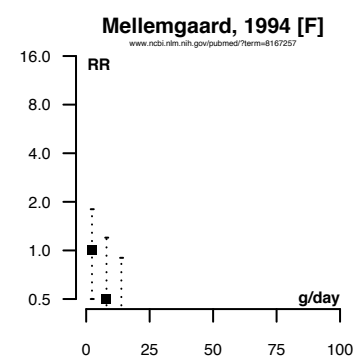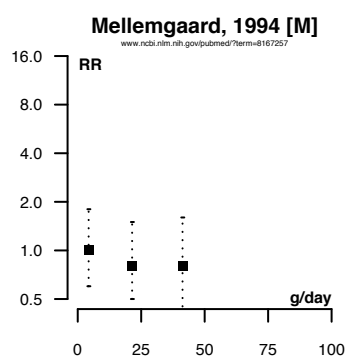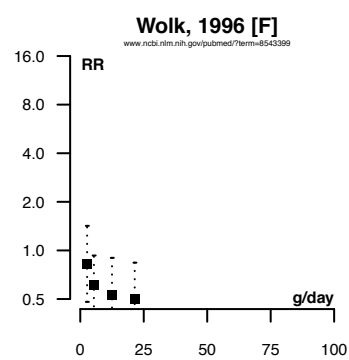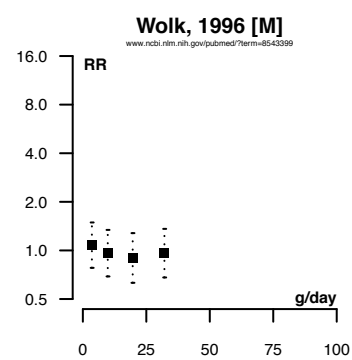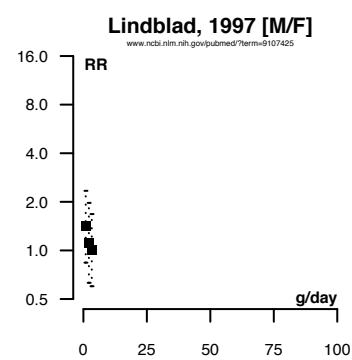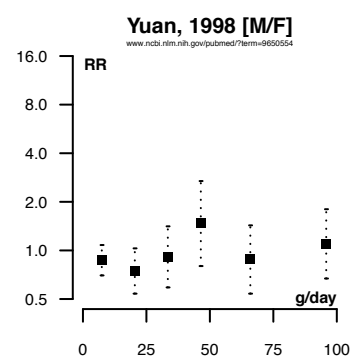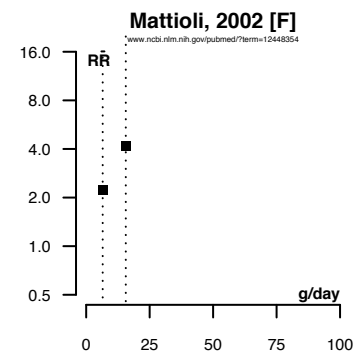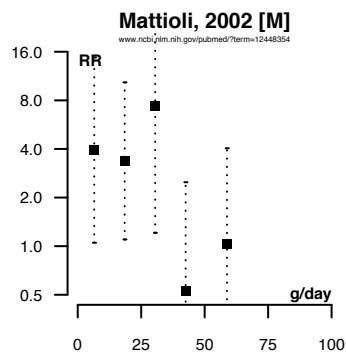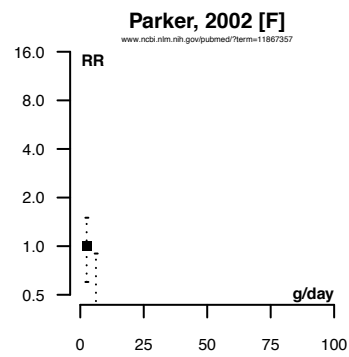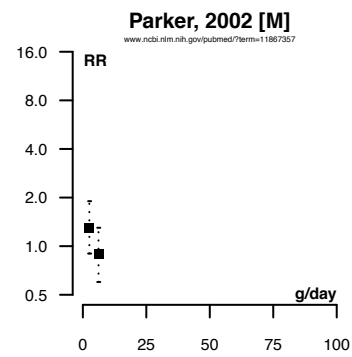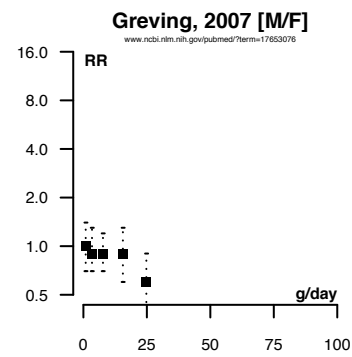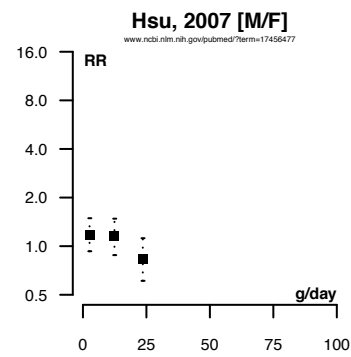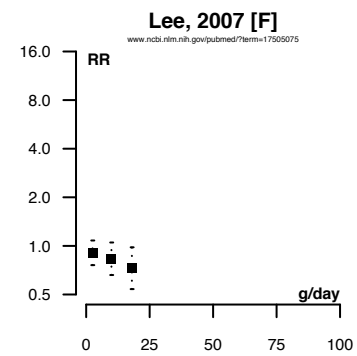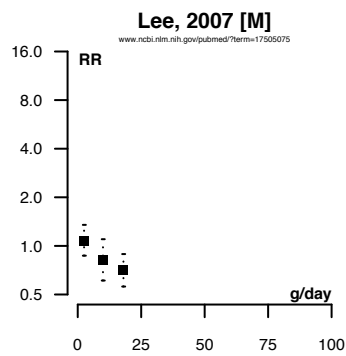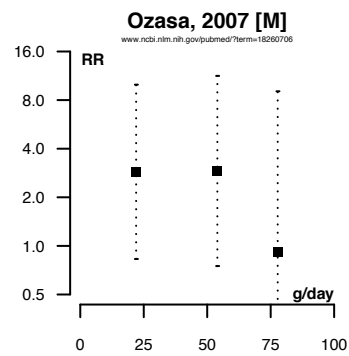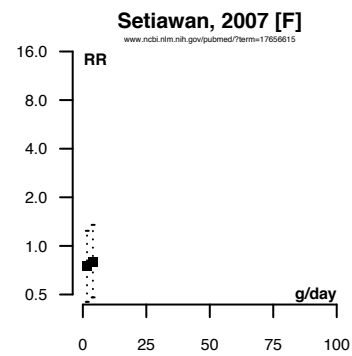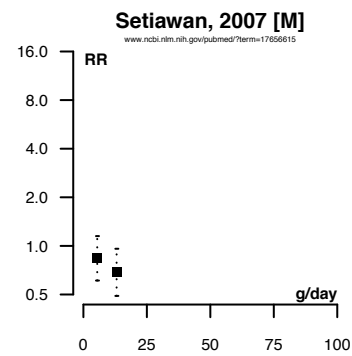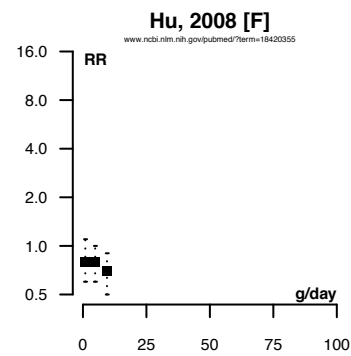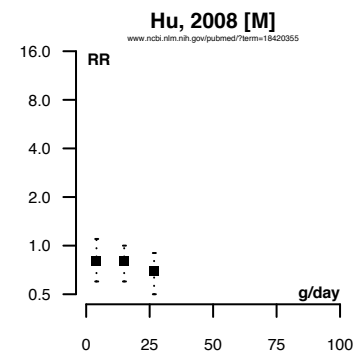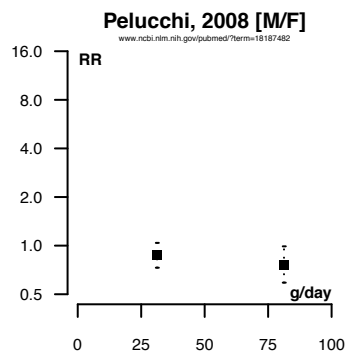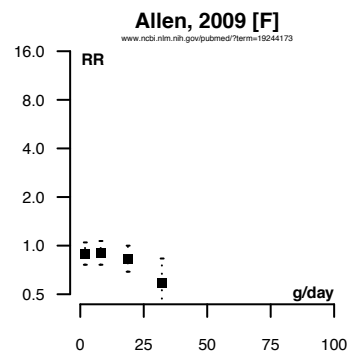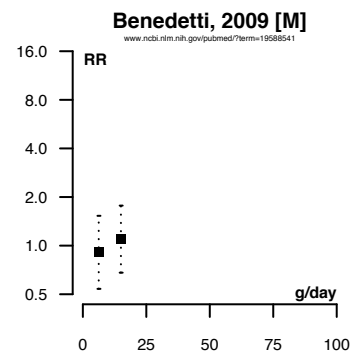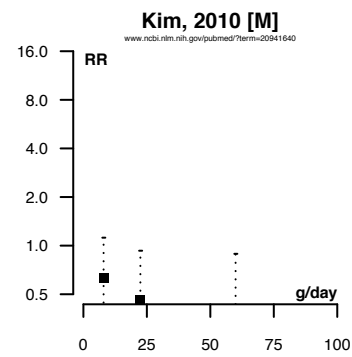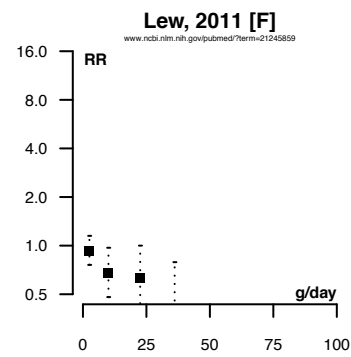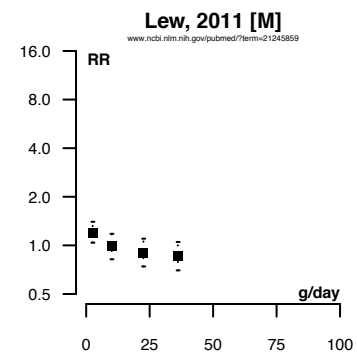

# Thyroid

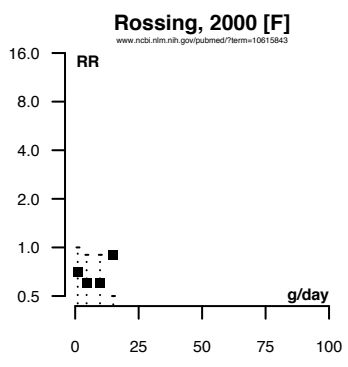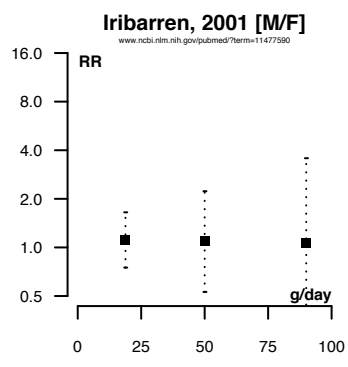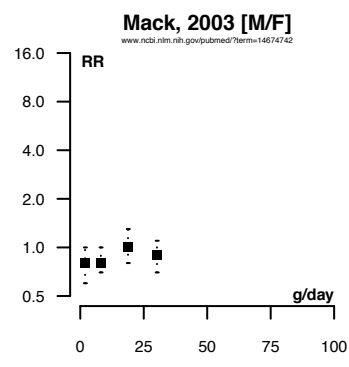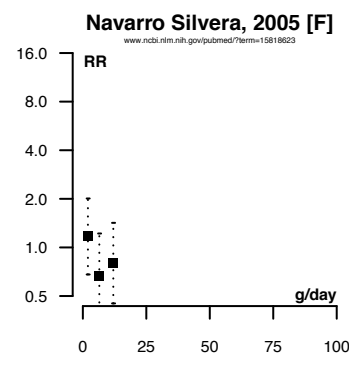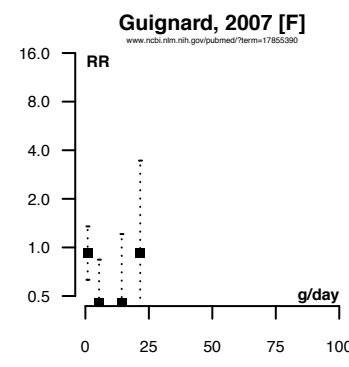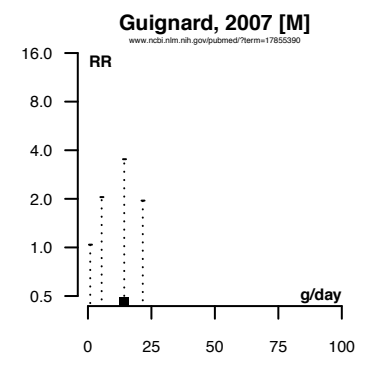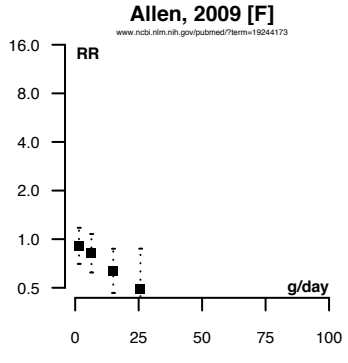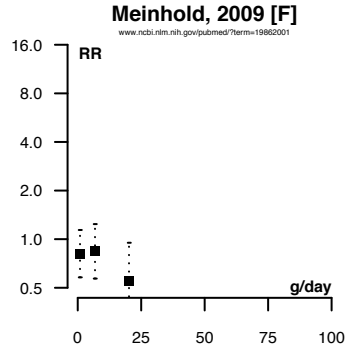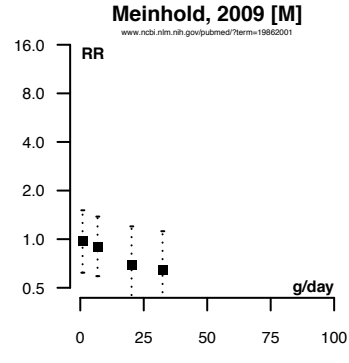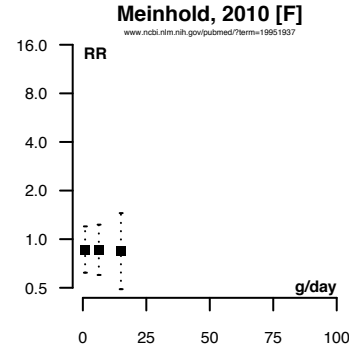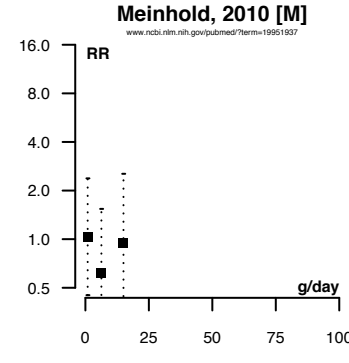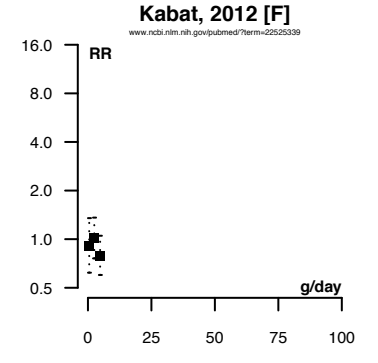

# Brain

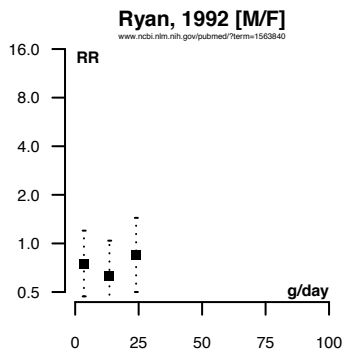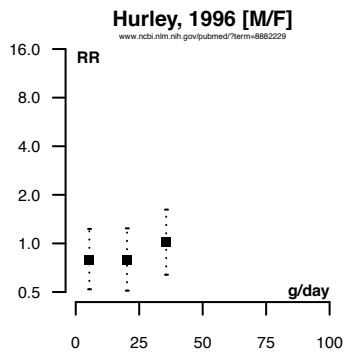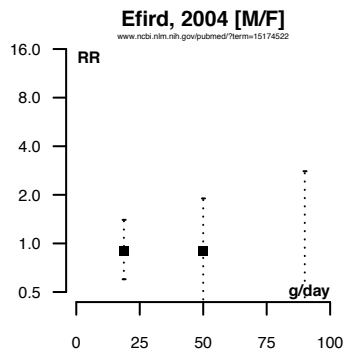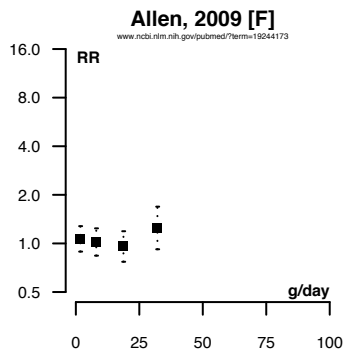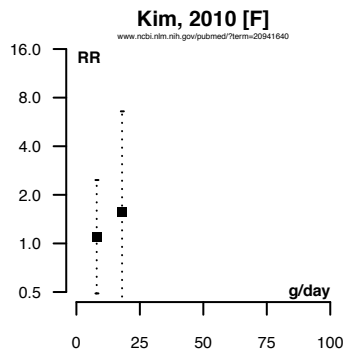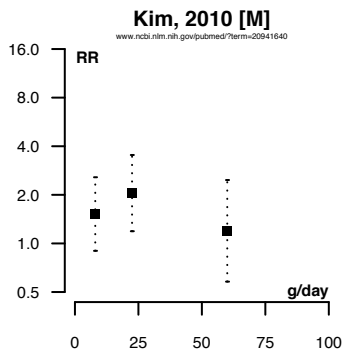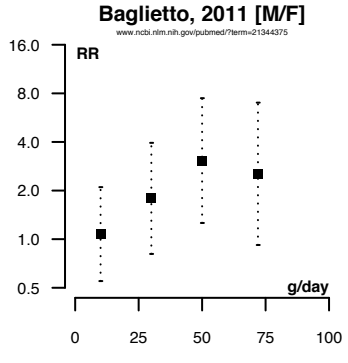

# **Hodgkin Lymphoma**



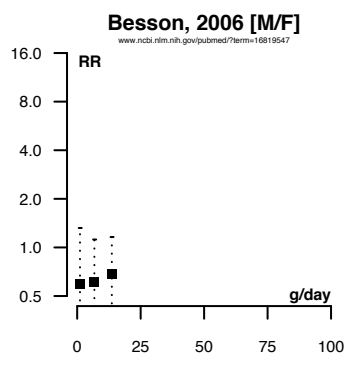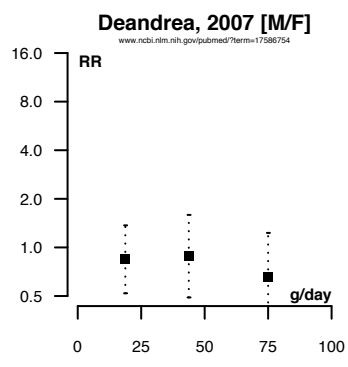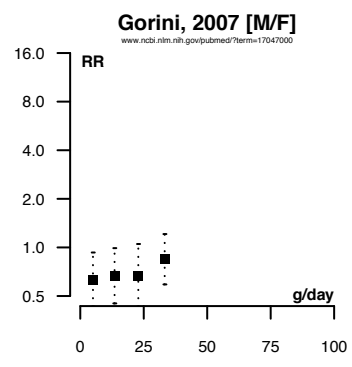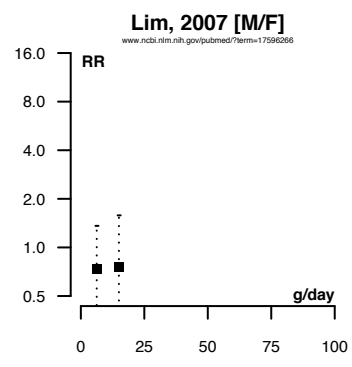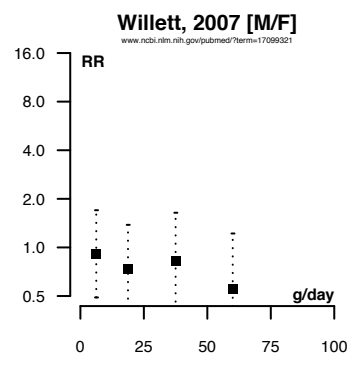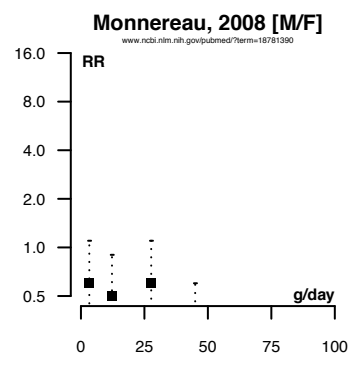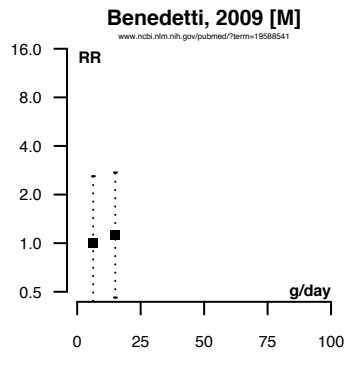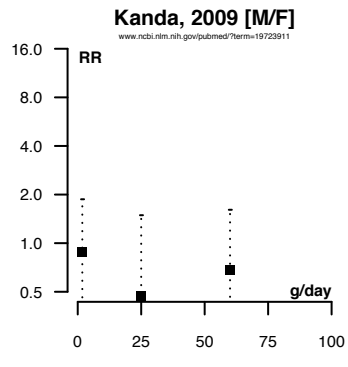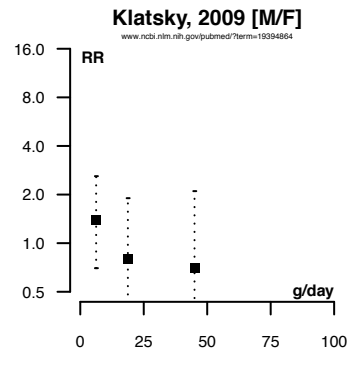

# **Non-Hodgkin Lymphoma**

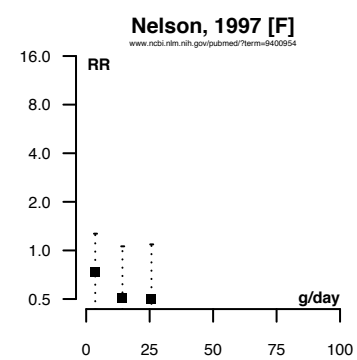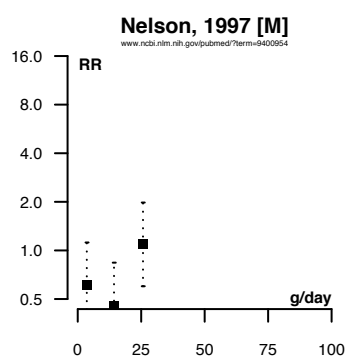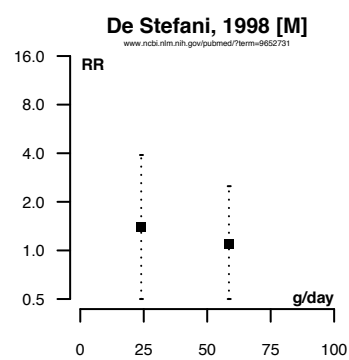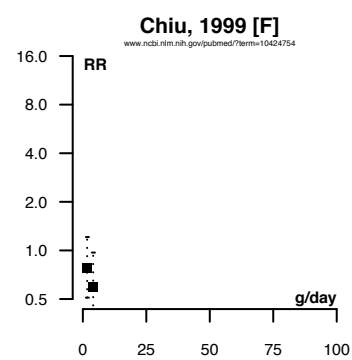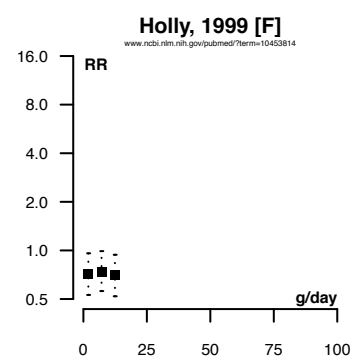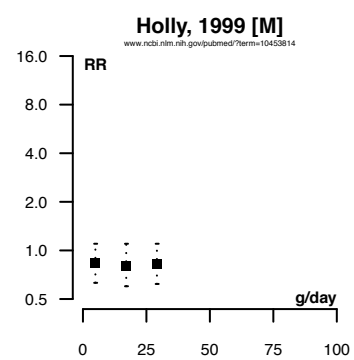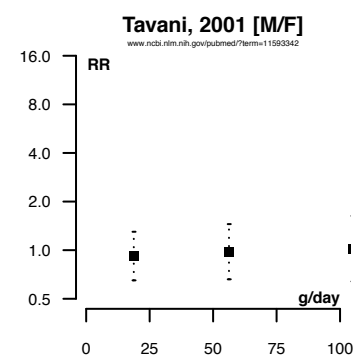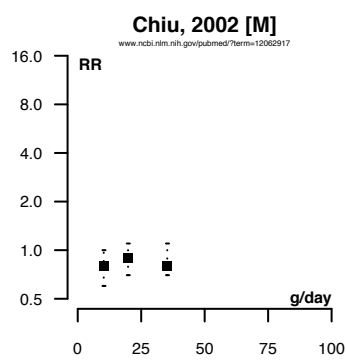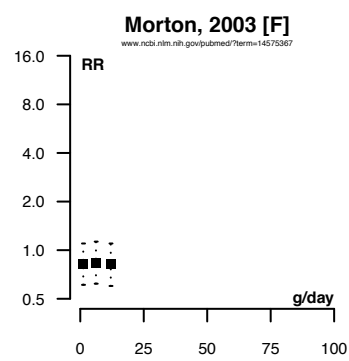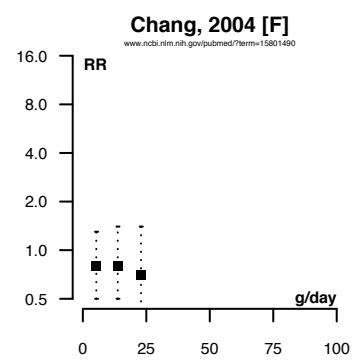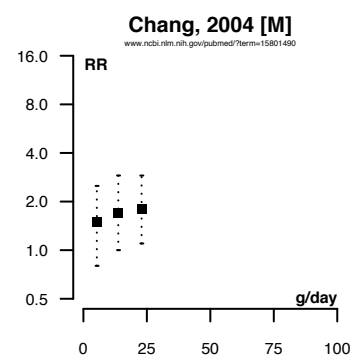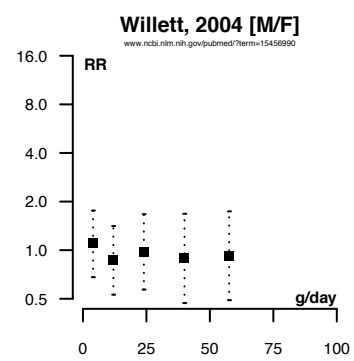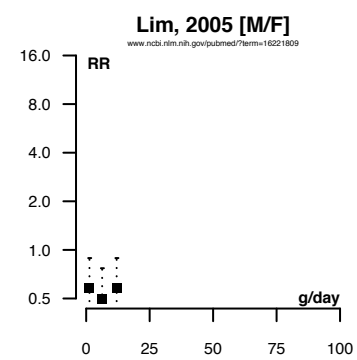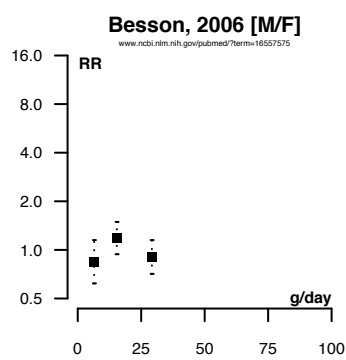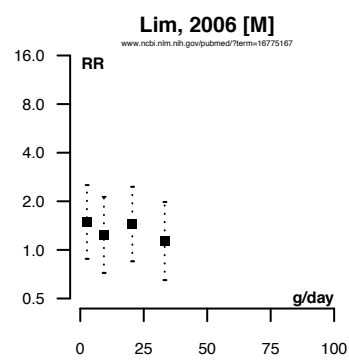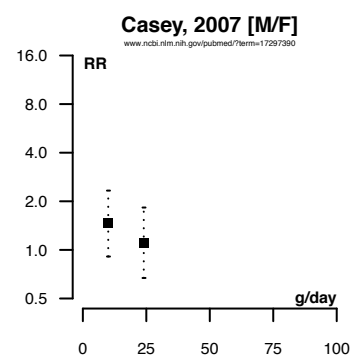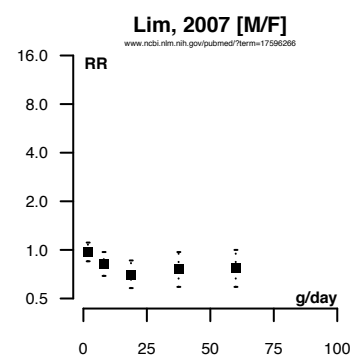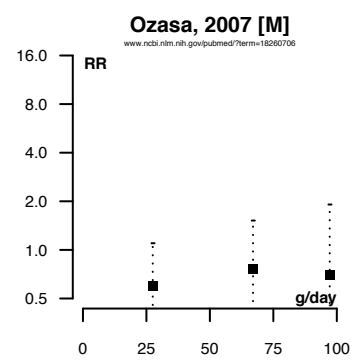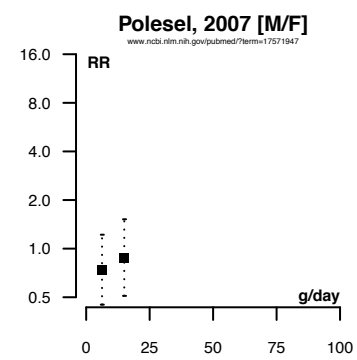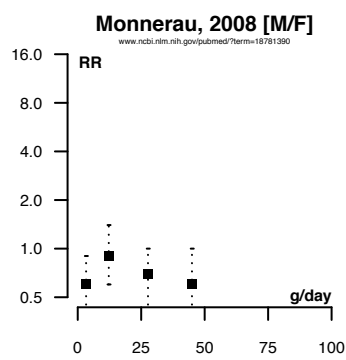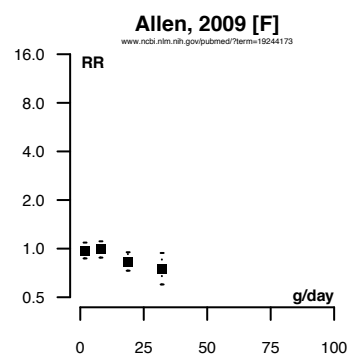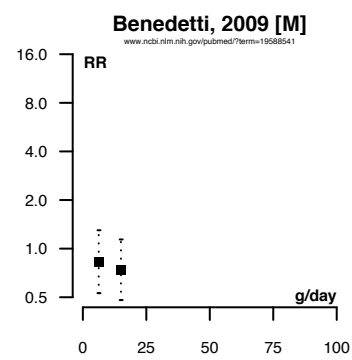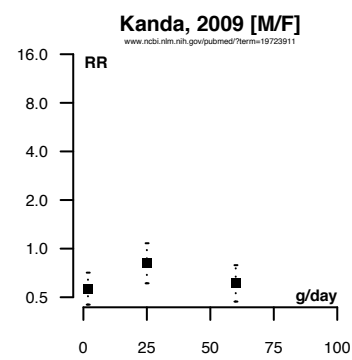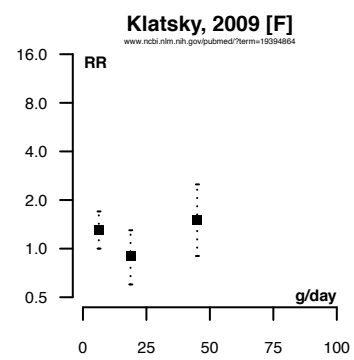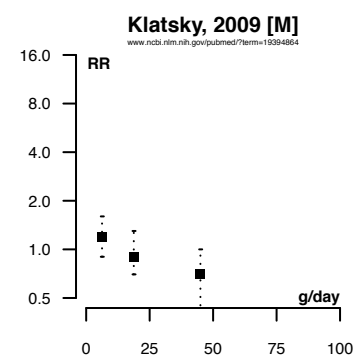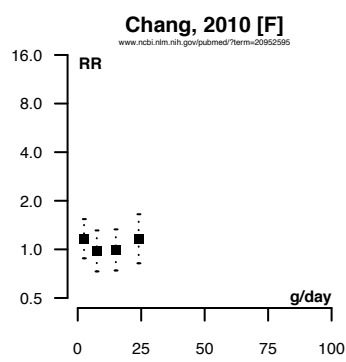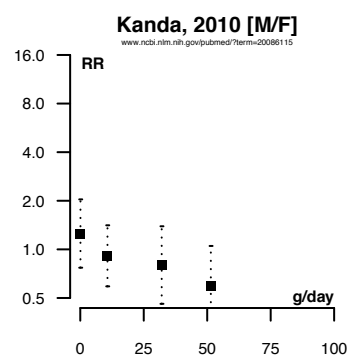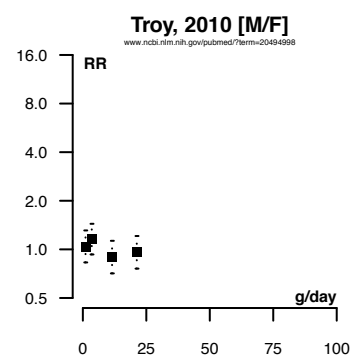

Supplement: bjc2014579x3.pdf [file bjc2014579x3.pdf]
