# Supplementary material for: Alcohol consumption and site-specific cancer risk: a comprehensive dose–response meta-analysis
Source: PubMed Central journal article supplement — Br J Cancer. 2014 Nov 25;112(3):580–93. doi: 10.1038/bjc.2014.579 (PMC4453639; doi:10.1038/bjc.2014.579), 2014-11-25
Supplement: bjc2014579x2.pdf [file bjc2014579x2.pdf]

## Oral Cavity and Pharynx

Allen,N.E., Beral,V., Casabonne,D., Kan,S.W., Reeves,G.K., Brown,A., and Green,J. 2009. Moderate alcohol intake and cancer incidence in women. *J. Natl. Cancer Inst.* 101:296-305.

Altieri,A., Bosetti,C., Gallus,S., Franceschi,S., Dal,M.L., Talamini,R., Levi,F., Negri,E., Rodriguez,T., and La Vecchia,C. 2004. Wine, beer and spirits and risk of oral and pharyngeal cancer: a case-control study from Italy and Switzerland. *Oral Oncol* 40:904-909.

Andre,K., Schraub,S., Mercier,M., and Bontemps,P. 1995. Role of alcohol and tobacco in the aetiology of head and neck cancer: a case-control study in the Doubs region of France. *Eur. J. Cancer B Oral Oncol* 31B:301-309.

Balaram,P., Sridhar,H., Rajkumar,T., Vaccarella,S., Herrero,R., Nandakumar,A., Ravichandran,K., Ramdas,K., Sankaranarayanan,R., Gajalakshmi,V., Munoz,N., and Franceschi,S. 2002. Oral cancer in southern India: the influence of smoking, drinking, paan-chewing and oral hygiene. *Int. J. Cancer* 98:440-445.

Blot,W.J., McLaughlin,J.K., Winn,D.M., Austin,D.F., Greenberg,R.S., Preston-Martin,S., Bernstein,L., Schoenberg,J.B., Stemhagen,A., and Fraumeni,J.F., Jr. 1988. Smoking and drinking in relation to oral and pharyngeal cancer. *Cancer Res.* 48:3282-3287.

Boffetta,P. and Garfinkel,L. 1990. Alcohol drinking and mortality among men enrolled in an American Cancer Society prospective study. *Epidemiology* 1:342-348.

Boffetta,P., Mashberg,A., Winkelmann,R., and Garfinkel,L. 1992. Carcinogenic effect of tobacco smoking and alcohol drinking on anatomic sites of the oral cavity and oropharynx. *Int. J. Cancer* 52:530-533.

Bouchardy,C., Hirvonen,A., Coutelle,C., Ward,P.J., Dayer,P., and Benhamou,S. 2000. Role of alcohol dehydrogenase 3 and cytochrome P-4502E1 genotypes in susceptibility to cancers of the upper aerodigestive tract. *Int. J. Cancer* 87:734-740.

Bross,I.D. and Coombs,J. 1976. Early onset of oral cancer among women who drink and smoke. *Oncology* 33:136-139.

Bundgaard,T., Wildt,J., Frydenberg,M., Elbrond,O., and Nielsen,J.E. 1995. Case-control study of squamous cell cancer of the oral cavity in Denmark. *Cancer Causes Control* 6:57-67.

Castellsague,X., Quintana,M.J., Martinez,M.C., Nieto,A., Sanchez,M.J., Juan,A., Monner,A., Carrera,M., Agudo,A., Quer,M., Munoz,N., Herrero,R., Franceschi,S., and Bo-

sch,F.X. 2004. The role of type of tobacco and type of alcoholic beverage in oral carcinogenesis. *Int. J. Cancer* 108:741-749.

Choi,S.Y. and Kahyo,H. 1991. Effect of cigarette smoking and alcohol consumption in the aetiology of cancer of the oral cavity, pharynx and larynx. *Int. J. Epidemiol.* 20:878-885.

De,S.E., Boffetta,P., Deneo-Pellegrini,H., Ronco,A.L., Acosta,G., Ferro,G., Oreggia,F., and Leiva,J. 2007. The effect of smoking and drinking in oral and pharyngeal cancers: a case-control study in Uruguay. *Cancer Lett.* 246:282-289.

Elwood,J.M., Pearson,J.C., Skippen,D.H., and Jackson,S.M. 1984. Alcohol, smoking, social and occupational factors in the aetiology of cancer of the oral cavity, pharynx and larynx. *Int. J. Cancer* 34:603-612.

Franceschi,S., Talamini,R., Barra,S., Baron,A.E., Negri,E., Bidoli,E., Serraino,D., and La Vecchia,C. 1990. Smoking and drinking in relation to cancers of the oral cavity, pharynx, larynx, and esophagus in northern Italy. *Cancer Res.* 50:6502-6507.

Franceschi,S., Levi,F., La Vecchia,C., Conti,E., Dal,M.L., Barzan,L., and Talamini,R. 1999. Comparison of the effect of smoking and alcohol drinking between oral and pharyngeal cancer. *Int. J. Cancer* 83:1-4.

Garrote,L.F., Herrero,R., Reyes,R.M., Vaccarella,S., Anta,J.L., Ferbeye,L., Munoz,N., and Franceschi,S. 2001. Risk factors for cancer of the oral cavity and oro-pharynx in Cuba. *Br. J. Cancer* 85:46-54.

Graham,S., Dayal,H., Rohrer,T., Swanson,M., Sultz,H., Shedd,D., and Fischman,S. 1977. Dentition, diet, tobacco, and alcohol in the epidemiology of oral cancer. *J. Natl. Cancer Inst.* 59:1611-1618.

Hayes,R.B., Bravo-Otero,E., Kleinman,D.V., Brown,L.M., Fraumeni,J.F., Jr., Harty,L.C., and Winn,D.M. 1999. Tobacco and alcohol use and oral cancer in Puerto Rico. *Cancer Causes Control* 10:27-33.

Herrero,R., Castellsague,X., Pawlita,M., Lissowska,J., Kee,F., Balaram,P., Rajkumar,T., Sridhar,H., Rose,B., Pintos,J., Fernandez,L., Idris,A., Sanchez,M.J., Nieto,A., Talamini,R., Tavani,A., Bosch,F.X., Reidel,U., Snijders,P.J., Meijer,C.J., Viscidi,R., Munoz,N., and Franceschi,S. 2003. Human papillomavirus and oral cancer: the International Agency for Research on Cancer multicenter study. *J. Natl. Cancer Inst.* 95:1772-1783.

Ide,R., Mizoue,T., Fujino,Y., Hoshiyama,Y., Sakata,K., Tamakoshi,A., and Yoshimura,T. 2008. Cigarette smoking, alcohol drinking, and oral and pharyngeal cancer mortality in Japan. *Oral Dis.* 14:314-319.

Kabat,G.C., Chang,C.J., and Wynder,E.L. 1994. The role of tobacco, alcohol use, and body mass index in oral and pharyngeal cancer. *Int. J. Epidemiol.* 23:1137-1144.

Keller,A.Z. and Terris,M. 1965. The association of alcohol and tobacco with cancer of the mouth and pharynx. *Am. J. Public Health Nations. Health* 55:1578-1585.

Kim,M.K., Ko,M.J., and Han,J.T. 2010. Alcohol consumption and mortality from all-cause and cancers among 1.34 million Koreans: the results from the Korea national health insurance corporation's health examinee cohort in 2000  
3. *Cancer Causes Control* 21:2295-2302.

Lee,K.W., Kuo,W.R., Tsai,S.M., Wu,D.C., Wang,W.M., Fang,F.M., Chiang,F.Y., Ho,K.Y., Wang,L.F., Tai,C.F., Kao,E.L., Chou,S.H., Lee,C.H., Chai,C.Y., and Ko,Y.C. 2005. Different impact from betel quid, alcohol and cigarette: risk factors for pharyngeal and laryngeal cancer. *Int. J. Cancer* 117:831-836.

Lissowska,J., Pilarska,A., Pilarski,P., Samolczyk-Wanyura,D., Piekarczyk,J., Bardin-Mikollajczak,A., Zatonski,W., Herrero,R., Munoz,N., and Franceschi,S. 2003. Smoking, alcohol, diet, dentition and sexual practices in the epidemiology of oral cancer in Poland. *Eur. J. Cancer Prev.* 12:25-33.

Maier,H., Sennewald,E., Heller,G.F., and Weidauer,H. 1994. Chronic alcohol consumption--the key risk factor for pharyngeal cancer. *Otolaryngol. Head Neck Surg.* 110:168-173.

Martinez,I. 1969. Factors associated with ccer of the esophagus, mouth, and pharynx in Puerto Rico. *J. Natl. Cancer Inst.* 42:1069-1094.

Matsuo,K., Rossi,M., Negri,E., Oze,I., Hosono,S., Ito,H., Watanabe,M., Yatabe,Y., Hasegawa,Y., Tanaka,H., Tajima,K., and La Vecchia,C. 2012. Folate, alcohol, and aldehyde dehydrogenase 2 polymorphism and the risk of oral and pharyngeal cancer in Japanese  
1. *Eur. J. Cancer Prev.* 21:193-198.

Menvielle,G., Luce,D., Goldberg,P., Bugel,I., and Leclerc,A. 2004. Smoking, alcohol drinking and cancer risk for various sites of the larynx and hypopharynx. A case-control study in France. *Eur. J. Cancer Prev.* 13:165-172.

Merletti,F., Boffetta,P., Ciccone,G., Mashberg,A., and Terracini,B. 1989. Role of tobacco and alcoholic beverages in the etiology of cancer of the oral cavity/oropharynx in Torino, Italy. *Cancer Res.* 49:4919-4924.

Moreno-Lopez,L.A., Esparza-Gomez,G.C., Gonzalez-Navarro,A., Cerero-Lapiedra,R., Gonzalez-Hernandez,M.J., and Dominguez-Rojas,V. 2000. Risk of oral cancer associated with tobacco smoking, alcohol consumption and oral hygiene: a case-control study in Madrid, Spain. *Oral Oncol* 36:170-174.

Oreggia,F., De,S.E., Correa,P., and Fierro,L. 1991. Risk factors for cancer of the tongue in Uruguay. *Cancer* 67:180-183.

Peters,E.S., McClean,M.D., Marsit,C.J., Lueckert,B., and Kelsey,K.T. 2006. Glutathione S-transferase polymorphisms and the synergy of alcohol and tobacco in oral, pharyngeal, and laryngeal carcinoma. *Cancer Epidemiol. Biomarkers Prev.* 15:2196-2202.

Rosenquist,K., Wennerberg,J., Schildt,E.B., Bladstrom,A., Hansson,B.G., and Andersson,G. 2005. Use of Swedish moist snuff, smoking and alcohol consumption in the aetiology of oral and oropharyngeal squamous cell carcinoma. A population-based case-control study in southern Sweden. *Acta Otolaryngol.* 125:991-998.

Rossing,M.A., Vaughan,T.L., and McKnight,B. 1989. Diet and pharyngeal cancer. *Int. J. Cancer* 44:593-597.

Sankaranarayanan,R., Duffy,S.W., Day,N.E., Nair,M.K., and Padmakumary,G. 1989. A case-control investigation of cancer of the oral tongue and the floor of the mouth in southern India. *Int. J. Cancer* 44:617-621.

Schwartz,S.M., Doody,D.R., Fitzgibbons,E.D., Ricks,S., Porter,P.L., and Chen,C. 2001. Oral squamous cell cancer risk in relation to alcohol consumption and alcohol dehydrogenase-3 genotypes. *Cancer Epidemiol. Biomarkers Prev.* 10:1137-1144.

Shanmugham,J.R., Zavras,A.I., Rosner,B.A., and Giovannucci,E.L. 2010. Alcohol-folate interactions in the risk of oral cancer in women: a prospective cohort study. *Cancer Epidemiol. Biomarkers Prev.* 19:2516-2524.

Subapriya,R., Thangavelu,A., Mathavan,B., Ramachandran,C.R., and Nagini,S. 2007. Assessment of risk factors for oral squamous cell carcinoma in Chidambaram, Southern India: a case-control study. *Eur. J. Cancer Prev.* 16:251-256.

Takacs,D., Koppany,F., Mihalyi,S., and Suba,Z. 2011. Decreased oral cancer risk by moderate alcohol consumption in non-smoker postmenopausal women  
2. *Oral Oncol* 47:537-540.

Takezaki,T., Hirose,K., Inoue,M., Hamajima,N., Kuroishi,T., Nakamura,S., Koshikawa,T., Matsuura,H., and Tajima,K. 1996. Tobacco, alcohol and dietary factors associated with the risk of oral cancer among Japanese. *Jpn. J. Cancer Res.* 87:555-562.

Takezaki,T., Shinoda,M., Hatooka,S., Hasegawa,Y., Nakamura,S., Hirose,K., Inoue,M., Hamajima,N., Kuroishi,T., Matsuura,H., and Tajima,K. 2000. Subsite-specific risk factors for hypopharyngeal and esophageal cancer (Japan). *Cancer Causes Control* 11:597-608.

Tuyns,A.J., Esteve,J., Raymond,L., Berrino,F., Benhamou,E., Blanchet,F., Boffetta,P., Crosignani,P., del,M.A., Lehmann,W., and . 1988. Cancer of the larynx/hypopharynx, tobacco and alcohol: IARC international case-control study in Turin and Varese (Italy), Zaragoza and Navarra (Spain), Geneva (Switzerland) and Calvados (France). *Int. J. Cancer* 41:483-491.

Varela-Lema,L., Ruano-Ravina,A., Juiz Crespo,M.A., and Barros-Dios,J.M. 2010. Tobacco consumption and oral and pharyngeal cancer in a Spanish male population. *Cancer Lett.* 288:28-35.

VINCENT,R.G. and MARCHETTA,F. 1963. THE RELATIONSHIP OF THE USE OF TOBACCO AND ALCOHOL TO CANCER OF THE ORAL CAVITY, PHARYNX OR LARYNX. *Am. J. Surg.* 106:501-505.

Vlajinac,H.D., Marinkovic,J.M., Sipetic,S.B., Andrejic,D.M., Adanja,B.J., and Stosic-Divjak,S.L. 2006. Case-control study of oropharyngeal cancer. *Cancer Detect. Prev.* 30:152-157.

Wang,D., Ritchie,J.M., Smith,E.M., Zhang,Z., Turek,L.P., and Haugen,T.H. 2005. Alcohol dehydrogenase 3 and risk of squamous cell carcinomas of the head and neck. *Cancer Epidemiol. Biomarkers Prev.* 14:626-632.

Wynder,E.L. and BROSS,I.J. 1957. Aetiological factors in mouth cancer; an approach to its prevention. *Br. Med. J.* 1:1137-1143.

Zavras,A.I., Douglass,C.W., Joshipura,K., Wu,T., Laskaris,G., Petridou,E., Dokianakis,G., Segas,J., Lefantzis,D., Nomikos,P., Wang,Y.F., and Diehl,S.R. 2001. Smoking and alcohol in the etiology of oral cancer: gender-specific risk profiles in the south of Greece. *Oral Oncol* 37:28-35.

Zheng,T.Z., Boyle,P., Hu,H.F., Duan,J., Jiang,P.J., Ma,D.Q., Shui,L.P., Niu,S.R., and MacMahon,B. 1990. Tobacco smoking, alcohol consumption, and risk of oral cancer: a case-control study in Beijing, People's Republic of China. *Cancer Causes Control* 1:173-179.

Znaor,A., Brennan,P., Gajalakshmi,V., Mathew,A., Shanta,V., Varghese,C., and Boffetta,P. 2003. Independent and combined effects of tobacco smoking, chewing and alcohol drinking on the risk of oral, pharyngeal and esophageal cancers in Indian men. *Int. J. Cancer* 105:681-686.

## Esophageal SCC

Adelhardt,M., Moller,J.O., and Sand,H.H. 1985. Cancer of the larynx, pharynx, and oesophagus in relation to alcohol and tobacco consumption among Danish brewery workers. *Dan. Med. Bull.* 32:119-123.

Allen,N.E., Beral,V., Casabonne,D., Kan,S.W., Reeves,G.K., Brown,A., and Green,J. 2009. Moderate alcohol intake and cancer incidence in women. *J. Natl. Cancer Inst.* 101:296-305.

Benedetti,A., Parent,M.E., and Siemiatycki,J. 2009. Lifetime consumption of alcoholic beverages and risk of 13 types of cancer in men: results from a case-control study in Montreal. *Cancer Detect. Prev.* 32:352-362.

Boffetta,P. and Garfinkel,L. 1990. Alcohol drinking and mortality among men enrolled in an American Cancer Society prospective study. *Epidemiology* 1:342-348.

Bollschweiler,E., Wolfgarten,E., Nowroth,T., Rosendahl,U., Monig,S.P., and Holscher,A.H. 2002. Vitamin intake and risk of subtypes of esophageal cancer in Germany. *J. Cancer Res. Clin. Oncol* 128:575-580.

Boonyaphiphat,P., Thongsuksai,P., Sriplung,H., and Puttawibul,P. 2002. Lifestyle habits and genetic susceptibility and the risk of esophageal cancer in the Thai population. *Cancer Lett.* 186:193-199.

Bosetti,C., La Vecchia,C., Negri,E., and Franceschi,S. 2000. Wine and other types of alcoholic beverages and the risk of esophageal cancer. *Eur. J. Clin. Nutr.* 54:918-920.

Brown,L.M., Hoover,R.N., Greenberg,R.S., Schoenberg,J.B., Schwartz,A.G., Swanson,G.M., Liff,J.M., Silverman,D.T., Hayes,R.B., and Pottern,L.M. 1994. Are racial differences in squamous cell esophageal cancer explained by alcohol and tobacco use? *J. Natl. Cancer Inst.* 86:1340-1345.

Castellsague,X., Munoz,N., De,S.E., Victora,C.G., Castelletto,R., Rolon,P.A., and Quintana,M.J. 1999. Independent and joint effects of tobacco smoking and alcohol drinking on the risk of esophageal cancer in men and women. *Int. J. Cancer* 82:657-664.

Cheng,K.K., Day,N.E., Duffy,S.W., Lam,T.H., Fok,M., and Wong,J. 1992. Pickled vegetables in the aetiology of oesophageal cancer in Hong Kong Chinese. *Lancet* 339:1314-1318.

Choi,S.Y. and Kahyo,H. 1991. Effect of cigarette smoking and alcohol consumption in the etiology of cancers of the digestive tract. *Int. J. Cancer* 49:381-386.

De, S.E., Ronco, A.L., Boffetta, P., Deneo-Pellegrini, H., Acosta, G., Correa, P., and Mendilaharsu, M. 2006. Nutrient intake and risk of squamous cell carcinoma of the esophagus: a case-control study in Uruguay. *Nutr. Cancer* 56:149-157.

Fan, Y., Yuan, J.M., Wang, R., Gao, Y.T., and Yu, M.C. 2008. Alcohol, tobacco, and diet in relation to esophageal cancer: the Shanghai Cohort Study. *Nutr. Cancer* 60:354-363.

Freedman, N.D., Abnet, C.C., Leitzmann, M.F., Mouw, T., Subar, A.F., Hollenbeck, A.R., and Schatzkin, A. 2007. A prospective study of tobacco, alcohol, and the risk of esophageal and gastric cancer subtypes. *Am. J. Epidemiol.* 165:1424-1433.

Gammon, M.D., Schoenberg, J.B., Ahsan, H., Risch, H.A., Vaughan, T.L., Chow, W.H., Rotterdam, H., West, A.B., Dubrow, R., Stanford, J.L., Mayne, S.T., Farrow, D.C., Niwa, S., Blot, W.J., and Fraumeni, J.F., Jr. 1997. Tobacco, alcohol, and socioeconomic status and adenocarcinomas of the esophagus and gastric cardia. *J. Natl. Cancer Inst.* 89:1277-1284.

Gao, Y.T., McLaughlin, J.K., Blot, W.J., Ji, B.T., Benichou, J., Dai, Q., and Fraumeni, J.F., Jr. 1994. Risk factors for esophageal cancer in Shanghai, China. I. Role of cigarette smoking and alcohol drinking. *Int. J. Cancer* 58:192-196.

Garidou, A., Tzonou, A., Lipworth, L., Signorello, L.B., Kalapothaki, V., and Trichopoulos, D. 1996. Life-style factors and medical conditions in relation to esophageal cancer by histologic type in a low-risk population. *Int. J. Cancer* 68:295-299.

Guo, Y.M., Wang, Q., Liu, Y.Z., Chen, H.M., Qi, Z., and Guo, Q.H. 2008. Genetic polymorphisms in cytochrome P450E1, alcohol and aldehyde dehydrogenases and the risk of esophageal squamous cell carcinoma in Gansu Chinese males. *World J. Gastroenterol.* 14:1444-1449.

Hanaoka, T., Tsugane, S., Ando, N., Ishida, K., Kakegawa, T., Isono, K., Takiyama, W., Takagi, I., Ide, H., Watanabe, H., and . 1994. Alcohol consumption and risk of esophageal cancer in Japan: a case-control study in seven hospitals. *Jpn. J. Clin. Oncol* 24:241-246.

Hashibe, M., Boffetta, P., Janout, V., Zaridze, D., Shangina, O., Mates, D., Szeszenia-Dabrowska, N., Bencko, V., and Brennan, P. 2007. Esophageal cancer in Central and Eastern Europe: tobacco and alcohol. *Int. J. Cancer* 120:1518-1522.

Ishiguro, S., Sasazuki, S., Inoue, M., Kurahashi, N., Iwasaki, M., and Tsugane, S. 2009. Effect of alcohol consumption, cigarette smoking and flushing response on esophageal cancer risk: a population-based cohort study (JPHC study). *Cancer Lett.* 275:240-246.

Jayaprakash,V., Menezes,R.J., Javle,M.M., McCann,S.E., Baker,J.A., Reid,M.E., Natarajan,N., and Moysich,K.B. 2006. Regular aspirin use and esophageal cancer risk. *Int. J. Cancer* 119:202-207.

Kabat,G.C., Ng,S.K., and Wynder,E.L. 1993. Tobacco, alcohol intake, and diet in relation to adenocarcinoma of the esophagus and gastric cardia. *Cancer Causes Control* 4:123-132.

Kim,M.K., Ko,M.J., and Han,J.T. 2010. Alcohol consumption and mortality from all-cause and cancers among 1.34 million Koreans: the results from the Korea national health insurance corporation's health examinee cohort in 2000  
2. *Cancer Causes Control* 21:2295-2302.

Kimm,H., Kim,S., and Jee,S.H. 2010. The independent effects of cigarette smoking, alcohol consumption, and serum aspartate aminotransferase on the alanine aminotransferase ratio in korean men for the risk for esophageal cancer  
4. *Yonsei Med. J.* 51:310-317.

Kono,S., Ikeda,M., Tokudome,S., Nishizumi,M., and Kuratsune,M. 1987. Cigarette smoking, alcohol and cancer mortality: a cohort study of male Japanese physicians. *Jpn. J. Cancer Res.* 78:1323-1328.

Lagergren,J., Bergstrom,R., Lindgren,A., and Nyren,O. 2000. The role of tobacco, snuff and alcohol use in the aetiology of cancer of the oesophagus and gastric cardia. *Int. J. Cancer* 85:340-346.

Launoy,G., Milan,C., Day,N.E., Faivre,J., Pienkowski,P., and Gignoux,M. 1997. Oesophageal cancer in France: potential importance of hot alcoholic drinks. *Int. J. Cancer* 71:917-923.

Lee,C.H., Wu,D.C., Lee,J.M., Wu,I.C., Goan,Y.G., Kao,E.L., Huang,H.L., Chan,T.F., Chou,S.H., Chou,Y.P., Lee,C.Y., Chen,P.S., Ho,C.K., He,J., and Wu,M.T. 2007. Carcinogenetic impact of alcohol intake on squamous cell carcinoma risk of the oesophagus in relation to tobacco smoking. *Eur. J. Cancer* 43:1188-1199.

Lindblad,M., Rodriguez,L.A., and Lagergren,J. 2005. Body mass, tobacco and alcohol and risk of esophageal, gastric cardia, and gastric non-cardia adenocarcinoma among men and women in a nested case-control study. *Cancer Causes Control* 16:285-294.

Martinez,I. 1969. Factors associated with ccer of the esophagus, mouth, and pharynx in Puerto Rico. *J. Natl. Cancer Inst.* 42:1069-1094.

Mettlin,C., Graham,S., Priore,R., Marshall,J., and Swanson,M. 1981. Diet and cancer of the esophagus. *Nutr. Cancer* 2:143-147.



Nakaya,N., Tsubono,Y., Kuriyama,S., Hozawa,A., Shimazu,T., Kurashima,K., Fukudo,S., Shibuya,D., and Tsuji,I. 2005. Alcohol consumption and the risk of cancer in Japanese men: the Miyagi cohort study. *Eur. J. Cancer Prev.* 14:169-174.

Ozasa,K. 2007. Alcohol use and mortality in the Japan Collaborative Cohort Study for Evaluation of Cancer (JACC). *Asian Pac. J. Cancer Prev.* 8 Suppl:81-88.

Pandeya,N., Williams,G., Green,A.C., Webb,P.M., and Whiteman,D.C. 2009. Alcohol consumption and the risks of adenocarcinoma and squamous cell carcinoma of the esophagus. *Gastroenterology* 136:1215-2.

Pottern,L.M., Morris,L.E., Blot,W.J., Ziegler,R.G., and Fraumeni,J.F., Jr. 1981. Esophageal cancer among black men in Washington, D.C. I. Alcohol, tobacco, and other risk factors. *J. Natl. Cancer Inst.* 67:777-783.

Sewram,V., De,S.E., Brennan,P., and Boffetta,P. 2003. Mate consumption and the risk of squamous cell esophageal cancer in uruguay. *Cancer Epidemiol. Biomarkers Prev.* 12:508-513.

Sharp,L., Chilvers,C.E., Cheng,K.K., McKinney,P.A., Logan,R.F., Cook-Mozaffari,P., Ahmed,A., and Day,N.E. 2001. Risk factors for squamous cell carcinoma of the oesophagus in women: a case-control study. *Br. J. Cancer* 85:1667-1670.

Smith,M., Zhou,M., Whitlock,G., Yang,G., Offer,A., Hui,G., Peto,R., Huang,Z., and Chen,Z. 2008. Esophageal cancer and body mass index: results from a prospective study of 220,000 men in China and a meta-analysis of published studies. *Int. J. Cancer* 122:1604-1610.

Steevens,J., Schouten,L.J., Goldbohm,R.A., and van den Brandt,P.A. 2010. Alcohol consumption, cigarette smoking and risk of subtypes of oesophageal and gastric cancer: a prospective cohort study. *Gut* 59:39-48.

Takezaki,T., Shinoda,M., Hatooka,S., Hasegawa,Y., Nakamura,S., Hirose,K., Inoue,M., Hamajima,N., Kuroishi,T., Matsuura,H., and Tajima,K. 2000. Subsite-specific risk factors for hypopharyngeal and esophageal cancer (Japan). *Cancer Causes Control* 11:597-608.

Tuyns,A.J., Pequignot,G., and Abbatucci,J.S. 1979. Oesophageal cancer and alcohol consumption; importance of type of beverage. *Int. J. Cancer* 23:443-447.

Vassallo,A., Correa,P., De,S.E., Cendan,M., Zavala,D., Chen,V., Carzoglio,J., and De-neo-Pellegrini,H. 1985. Esophageal cancer in Uruguay: a case-control study. *J. Natl. Cancer Inst.* 75:1005-1009.

Vaughan,T.L., Davis,S., Kristal,A., and Thomas,D.B. 1995. Obesity, alcohol, and tobacco as risk factors for cancers of the esophagus and gastric cardia: adenocarcinoma versus squamous cell carcinoma. *Cancer Epidemiol. Biomarkers Prev.* 4:85-92.

Vioque,J., Barber,X., Bolumar,F., Porta,M., Santibanez,M., de la Hera,M.G., and Moreno-Osset,E. 2008. Esophageal cancer risk by type of alcohol drinking and smoking: a case-control study in Spain. *BMC. Cancer* 8:221.

Wang,Y., Ji,R., Wei,X., Gu,L., Chen,L., Rong,Y., Wang,R., Zhang,Z., Liu,B., and Xia,S. 2011. Esophageal squamous cell carcinoma and ALDH2 and ADH1B polymorphisms in Chinese females  
1. *Asian Pac. J. Cancer Prev.* 12:2065-2068.

Wu,M., Zhang,Z.F., Kampman,E., Zhou,J.Y., Han,R.Q., Yang,J., Zhang,X.F., Gu,X.P., Liu,A.M., van't Veer,P., Kok,F.J., and Zhao,J.K. 2011. Does family history of cancer modify the effects of lifestyle risk factors on esophageal cancer? A population-based case-control study in China  
3. *Int. J. Cancer* 128:2147-2157.

Wynder,E.L. and BROSS,I.J. 1961. A study of etiological factors in cancer of the esophagus. *Cancer* 14:389-413.

Yang,C.X., Wang,H.Y., Wang,Z.M., Du,H.Z., Tao,D.M., Mu,X.Y., Chen,H.G., Lei,Y., Matsuo,K., and Tajima,K. 2005. Risk factors for esophageal cancer: a case-control study in South-western China. *Asian Pac. J. Cancer Prev.* 6:48-53.

Yi,S.W., Sull,J.W., Linton,J.A., Nam,C.M., and Ohrr,H. 2010. Alcohol consumption and digestive cancer mortality in Koreans: the Kangwha Cohort Study  
5. *J. Epidemiol.* 20:204-211.

Yokoyama,A., Kato,H., Yokoyama,T., Igaki,H., Tsujinaka,T., Muto,M., Omori,T., Kumagai,Y., Yokoyama,M., and Watanabe,H. 2006. Esophageal squamous cell carcinoma and aldehyde dehydrogenase-2 genotypes in Japanese females. *Alcohol Clin. Exp. Res.* 30:491-500.

Yokoyama,T., Yokoyama,A., Kato,H., Tsujinaka,T., Muto,M., Omori,T., Haneda,T., Kumagai,Y., Igaki,H., Yokoyama,M., Watanabe,H., and Yoshimizu,H. 2003. Alcohol flushing, alcohol and aldehyde dehydrogenase genotypes, and risk for esophageal squamous cell carcinoma in Japanese men. *Cancer Epidemiol. Biomarkers Prev.* 12:1227-1233.

Yu,M.C., Garabrant,D.H., Peters,J.M., and Mack,T.M. 1988. Tobacco, alcohol, diet, occupation, and carcinoma of the esophagus. *Cancer Res.* 48:3843-3848.

Znaor,A., Brennan,P., Gajalakshmi,V., Mathew,A., Shanta,V., Varghese,C., and Boffetta,P. 2003. Independent and combined effects of tobacco smoking, chewing and alcohol drinking on the risk of oral, pharyngeal and esophageal cancers in Indian men. *Int. J. Cancer* 105:681-686.

## Esophageal AC & GC

Allen,N.E., Beral,V., Casabonne,D., Kan,S.W., Reeves,G.K., Brown,A., and Green,J. 2009. Moderate alcohol intake and cancer incidence in women. *J. Natl. Cancer Inst.* 101:296-305.

Anderson,L.A., Cantwell,M.M., Watson,R.G., Johnston,B.T., Murphy,S.J., Ferguson,H.R., McGuigan,J., Comber,H., Reynolds,J.V., and Murray,L.J. 2009. The association between alcohol and reflux esophagitis, Barrett's esophagus, and esophageal adenocarcinoma. *Gastroenterology* 136:799-805.

Brown,L.M., Silverman,D.T., Potters,L.M., Schoenberg,J.B., Greenberg,R.S., Swanson,G.M., Liff,J.M., Schwartz,A.G., Hayes,R.B., Blot,W.J., and . 1994. Adenocarcinoma of the esophagus and esophagogastric junction in white men in the United States: alcohol, tobacco, and socioeconomic factors. *Cancer Causes Control* 5:333-340.

Chen,J., Zhang,N., Ling,Y., Wakai,T., He,Y., Wei,L., Wang,S., and Akazawa,K. 2011. Alcohol consumption as a risk factor for esophageal adenocarcinoma in North China. *Tohoku J. Exp. Med.* 224:21-27.

De,S.E., Boffetta,P., Carzoglio,J., Mendilaharsu,S., and Deneo-Pellegrini,H. 1998. Tobacco smoking and alcohol drinking as risk factors for stomach cancer: a case-control study in Uruguay. *Cancer Causes Control* 9:321-329.

Duell,E.J., Travier,N., Lujan-Barroso,L., Clavel-Chapelon,F., Boutron-Ruault,M.C., Morois,S., Palli,D., Krogh,V., Panico,S., Tumino,R., Sacerdote,C., Quiros,J.R., Sanchez-Cantalejo,E., Navarro,C., Gurrea,A.B., Dorronsoro,M., Khaw,K.T., Allen,N.E., Key,T.J., Bueno-de-Mesquita,H.B., Ros,M.M., Numans,M.E., Peeters,P.H., Trichopoulou,A., Naska,A., Dilis,V., Teucher,B., Kaaks,R., Boeing,H., Schutze,M., Regner,S., Lindkvist,B., Johansson,I., Hallmans,G., Overvad,K., Egeberg,R., Tjonneland,A., Lund,E., Weiderpass,E., Braaten,T., Romieu,I., Ferrari,P., Jenab,M., Stenling,R., Aune,D., Norat,T., Riboli,E., and Gonzalez,C.A. 2011. Alcohol consumption and gastric cancer risk in the European Prospective Investigation into Cancer and Nutrition (EPIC) cohort. *Am. J. Clin. Nutr.* 94:1266-1275.

Freedman,N.D., Abnet,C.C., Leitzmann,M.F., Mouw,T., Subar,A.F., Hollenbeck,A.R., and Schatzkin,A. 2007. A prospective study of tobacco, alcohol, and the risk of esophageal and gastric cancer subtypes. *Am. J. Epidemiol.* 165:1424-1433.

Freedman,N.D., Murray,L.J., Kamangar,F., Abnet,C.C., Cook,M.B., Nyren,O., Ye,W., Wu,A.H., Bernstein,L., Brown,L.M., Ward,M.H., Pandeya,N., Green,A.C., Casson,A.G., Giffen,C., Risch,H.A., Gammon,M.D., Chow,W.H., Vaughan,T.L., Corley,D.A., and Whiteman,D.C. 2011. Alcohol intake and risk of oesophageal adenocarcinoma: a pooled analysis from the BEACON Consortium. *Gut* 60:1029-1037.

Gammon,M.D., Schoenberg,J.B., Ahsan,H., Risch,H.A., Vaughan,T.L., Chow,W.H., Rotterdam,H., West,A.B., Dubrow,R., Stanford,J.L., Mayne,S.T., Farrow,D.C., Niwa,S., Blot,W.J., and Fraumeni,J.F., Jr. 1997. Tobacco, alcohol, and socioeconomic status and adenocarcinomas of the esophagus and gastric cardia. *J. Natl. Cancer Inst.* 89:1277-1284.

Gao,Y.T., McLaughlin,J.K., Blot,W.J., Ji,B.T., Benichou,J., Dai,Q., and Fraumeni,J.F., Jr. 1994. Risk factors for esophageal cancer in Shanghai, China. I. Role of cigarette smoking and alcohol drinking. *Int. J. Cancer* 58:192-196.

Garidou,A., Tzonou,A., Lipworth,L., Signorello,L.B., Kalapothaki,V., and Trichopoulos,D. 1996. Life-style factors and medical conditions in relation to esophageal cancer by histologic type in a low-risk population. *Int. J. Cancer* 68:295-299.

Hashibe,M., Boffetta,P., Janout,V., Zaridze,D., Shagina,O., Mates,D., Szeszenia-Dabrowska,N., Bencko,V., and Brennan,P. 2007. Esophageal cancer in Central and Eastern Europe: tobacco and alcohol. *Int. J. Cancer* 120:1518-1522.

Jayaprakash,V., Menezes,R.J., Javle,M.M., McCann,S.E., Baker,J.A., Reid,M.E., Natarajan,N., and Moysich,K.B. 2006. Regular aspirin use and esophageal cancer risk. *Int. J. Cancer* 119:202-207.

Ji,B.T., Chow,W.H., Yang,G., McLaughlin,J.K., Gao,R.N., Zheng,W., Shu,X.O., Jin,F., Fraumeni,J.F., Jr., and Gao,Y.T. 1996. The influence of cigarette smoking, alcohol, and green tea consumption on the risk of carcinoma of the cardia and distal stomach in Shanghai, China. *Cancer* 77:2449-2457.

Kabat,G.C., Ng,S.K., and Wynder,E.L. 1993. Tobacco, alcohol intake, and diet in relation to adenocarcinoma of the esophagus and gastric cardia. *Cancer Causes Control* 4:123-132.

Lagergren,J., Bergstrom,R., Lindgren,A., and Nyren,O. 2000. The role of tobacco, snuff and alcohol use in the aetiology of cancer of the oesophagus and gastric cardia. *Int. J. Cancer* 85:340-346.

Lindblad,M., Rodriguez,L.A., and Lagergren,J. 2005. Body mass, tobacco and alcohol and risk of esophageal, gastric cardia, and gastric non-cardia adenocarcinoma among men and women in a nested case-control study. *Cancer Causes Control* 16:285-294.

Pandeya,N., Williams,G., Green,A.C., Webb,P.M., and Whitman,D.C. 2009. Alcohol consumption and the risks of adenocarcinoma and squamous cell carcinoma of the esophagus. *Gastroenterology* 136:1215-2.

Steevens,J., Schouten,L.J., Goldbohm,R.A., and van den Brandt,P.A. 2010. Alcohol consumption, cigarette smoking and risk of subtypes of oesophageal and gastric cancer: a prospective cohort study. *Gut* 59:39-48.

Unakami,M., Hara,M., Fukuchi,S., and Akiyama,H. 1989. Cancer of the gastric cardia and the habit of smoking. *Acta Pathol. Jpn.* 39:420-424.

Vaughan,T.L., Davis,S., Kristal,A., and Thomas,D.B. 1995. Obesity, alcohol, and tobacco as risk factors for cancers of the esophagus and gastric cardia: adenocarcinoma versus squamous cell carcinoma. *Cancer Epidemiol. Biomarkers Prev.* 4:85-92.

Wu-Williams,A.H., Yu,M.C., and Mack,T.M. 1990. Life-style, workplace, and stomach cancer by subsite in young men of Los Angeles County. *Cancer Res.* 50:2569-2576.

Wu,A.H., Wan,P., and Bernstein,L. 2001. A multiethnic population-based study of smoking, alcohol and body size and risk of adenocarcinomas of the stomach and esophagus (United States). *Cancer Causes Control* 12:721-732.

Ye,W., Ekstrom,A.M., Hansson,L.E., Bergstrom,R., and Nyren,O. 1999. Tobacco, alcohol and the risk of gastric cancer by sub-site and histologic type. *Int. J. Cancer* 83:223-229.

Zhang,Z.F., Kurtz,R.C., Sun,M., Karpeh,M., Jr., Yu,G.P., Gargon,N., Fein,J.S., Georgopoulos,S.K., and Harlap,S. 1996. Adenocarcinomas of the esophagus and gastric cardia: medical conditions, tobacco, alcohol, and socioeconomic factors. *Cancer Epidemiol. Biomarkers Prev.* 5:761-768.

## **Stomach**

Agudo,A., Gonzalez,C.A., Marcos,G., Sanz,M., Saigi,E., Verge,J., Boleda,M., and Ortego,J. 1992. Consumption of alcohol, coffee, and tobacco, and gastric cancer in Spain. *Cancer Causes Control* 3:137-143.

Allen,N.E., Beral,V., Casabonne,D., Kan,S.W., Reeves,G.K., Brown,A., and Green,J. 2009. Moderate alcohol intake and cancer incidence in women. *J. Natl. Cancer Inst.* 101:296-305.

Barstad,B., Sorensen,T.I., Tjonneland,A., Johansen,D., Becker,U., Andersen,I.B., and Gronbaek,M. 2005. Intake of wine, beer and spirits and risk of gastric cancer. *Eur. J. Cancer Prev.* 14:239-243.

Benedetti,A., Parent,M.E., and Siemiatycki,J. 2009. Lifetime consumption of alcoholic beverages and risk of 13 types of cancer in men: results from a case-control study in Montreal. *Cancer Detect. Prev.* 32:352-362.

Buiatti,E., Palli,D., Decarli,A., Amadori,D., Avellini,C., Bianchi,S., Bonaguri,C., Cipriani,F., Cocco,P., Giacosa,A., and . 1990. A case-control study of gastric cancer and diet in Italy: II. Association with nutrients. *Int. J. Cancer* 45:896-901.

Chow,W.H., Swanson,C.A., Lissowska,J., Groves,F.D., Sobin,L.H., Nasierowska-Guttmejer,A., Radziszewski,J., Regula,J., Hsing,A.W., Jagannatha,S., Zatonski,W., and Blot,W.J. 1999. Risk of stomach cancer in relation to consumption of cigarettes, alcohol, tea and coffee in Warsaw, Poland. *Int. J. Cancer* 81:871-876.

D'Avanzo,B., La Vecchia,C., and Franceschi,S. 1994. Alcohol consumption and the risk of gastric cancer. *Nutr. Cancer* 22:57-64.

De,S.E., Correa,P., Fierro,L., Carzoglio,J., Deneo-Pellegrini,H., and Zavala,D. 1990. Alcohol drinking and tobacco smoking in gastric cancer. A case-control study. *Rev. Epidemiol. Sante Publique* 38:297-307.

De,S.E., Boffetta,P., Carzoglio,J., Mendilaharsu,S., and Deneo-Pellegrini,H. 1998. Tobacco smoking and alcohol drinking as risk factors for stomach cancer: a case-control study in Uruguay. *Cancer Causes Control* 9:321-329.

Duell,E.J., Travier,N., Lujan-Barroso,L., Clavel-Chapelon,F., Boutron-Ruault,M.C., Morois,S., Palli,D., Krogh,V., Panico,S., Tumino,R., Sacerdote,C., Quiros,J.R., Sanchez-Cantalejo,E., Navarro,C., Gurrea,A.B., Dorronsoro,M., Khaw,K.T., Allen,N.E., Key,T.J., Bueno-de-Mesquita,H.B., Ros,M.M., Numans,M.E., Peeters,P.H., Trichopoulou,A., Naska,A., Dilis,V., Teucher,B., Kaaks,R., Boeing,H., Schutze,M., Regner,S., Lindkvist,B., Johansson,I., Hallmans,G., Overvad,K., Egeberg,R., Tjonneland,A., Lund,E., Weider-

pass,E., Braaten,T., Romieu,I., Ferrari,P., Jenab,M., Stenling,R., Aune,D., Norat,T., Riboli,E., and Gonzalez,C.A. 2011. Alcohol consumption and gastric cancer risk in the European Prospective Investigation into Cancer and Nutrition (EPIC) cohort. *Am. J. Clin. Nutr.* 94:1266-1275.

Freedman,N.D., Abnet,C.C., Leitzmann,M.F., Mouw,T., Subar,A.F., Hollenbeck,A.R., and Schatzkin,A. 2007. A prospective study of tobacco, alcohol, and the risk of esophageal and gastric cancer subtypes. *Am. J. Epidemiol.* 165:1424-1433.

Galanis,D.J., Kolonel,L.N., Lee,J., and Nomura,A. 1998. Intakes of selected foods and beverages and the incidence of gastric cancer among the Japanese residents of Hawaii: a prospective study. *Int. J. Epidemiol.* 27:173-180.

Hassan,M.M., Phan,A., Li,D., Dagohoy,C.G., Leary,C., and Yao,J.C. 2008. Risk factors associated with neuroendocrine tumors: A U.S.-based case-control study. *Int. J. Cancer* 123:867-873.

Hoshiyama,Y. and Sasaba,T. 1992. A case-control study of stomach cancer and its relation to diet, cigarettes, and alcohol consumption in Saitama Prefecture, Japan. *Cancer Causes Control* 3:441-448.

Ji,B.T., Chow,W.H., Yang,G., McLaughlin,J.K., Gao,R.N., Zheng,W., Shu,X.O., Jin,F., Fraumeni,J.F., Jr., and Gao,Y.T. 1996. The influence of cigarette smoking, alcohol, and green tea consumption on the risk of carcinoma of the cardia and distal stomach in Shanghai, China. *Cancer* 77:2449-2457.

Kato,I., Tominaga,S., and Matsumoto,K. 1992. A prospective study of stomach cancer among a rural Japanese population: a 6-year survey. *Jpn. J. Cancer Res.* 83:568-575.

Kim,J., Park,S., and Nam,B.H. 2010. Gastric cancer and salt preference: a population-based cohort study in Korea. *Am. J. Clin. Nutr.* 91:1289-1293.

Kim,M.K., Ko,M.J., and Han,J.T. 2010. Alcohol consumption and mortality from all-cause and cancers among 1.34 million Koreans: the results from the Korea national health insurance corporation's health examinee cohort in 2000. *Cancer Causes Control* 21:2295-2302.

Kono,S., Ikeda,M., Tokudome,S., Nishizumi,M., and Kuratsune,M. 1987. Cigarette smoking, alcohol and cancer mortality: a cohort study of male Japanese physicians. *Jpn. J. Cancer Res.* 78:1323-1328.

Larsson,S.C., Giovannucci,E., and Wolk,A. 2007. Alcoholic beverage consumption and gastric cancer risk: a prospective population-based study in women. *Int. J. Cancer* 120:373-377.



Lindblad,M., Rodriguez,L.A., and Lagergren,J. 2005. Body mass, tobacco and alcohol and risk of esophageal, gastric cardia, and gastric non-cardia adenocarcinoma among men and women in a nested case-control study. *Cancer Causes Control* 16:285-294.

Lucenteforte,E., Scita,V., Bosetti,C., Bertuccio,P., Negri,E., and La Vecchia,C. 2008. Food groups and alcoholic beverages and the risk of stomach cancer: a case-control study in Italy. *Nutr. Cancer* 60:577-584.

Moy,K.A., Fan,Y., Wang,R., Gao,Y.T., Yu,M.C., and Yuan,J.M. 2010. Alcohol and tobacco use in relation to gastric cancer: a prospective study of men in Shanghai, China. *Cancer Epidemiol. Biomarkers Prev.* 19:2287-2297.

Murata,M., Takayama,K., Choi,B.C., and Pak,A.W. 1996. A nested case-control study on alcohol drinking, tobacco smoking, and cancer. *Cancer Detect. Prev.* 20:557-565.

Nakaya,N., Tsubono,Y., Kuriyama,S., Hozawa,A., Shimazu,T., Kurashima,K., Fukudo,S., Shibuya,D., and Tsuji,I. 2005. Alcohol consumption and the risk of cancer in Japanese men: the Miyagi cohort study. *Eur. J. Cancer Prev.* 14:169-174.

Ozasa,K. 2007. Alcohol use and mortality in the Japan Collaborative Cohort Study for Evaluation of Cancer (JACC). *Asian Pac. J. Cancer Prev.* 8 Suppl:81-88.

Sasazuki,S., Sasaki,S., and Tsugane,S. 2002. Cigarette smoking, alcohol consumption and subsequent gastric cancer risk by subsite and histologic type. *Int. J. Cancer* 101:560-566.

Shin,C.M., Kim,N., Cho,S.I., Kim,J.S., Jung,H.C., and Song,I.S. 2011. Association between alcohol intake and risk for gastric cancer with regard to ALDH2 genotype in the Korean population. *Int. J. Epidemiol.* 40:1047-1055.

Steevens,J., Schouten,L.J., Goldbohm,R.A., and van den Brandt,P.A. 2010. Alcohol consumption, cigarette smoking and risk of subtypes of oesophageal and gastric cancer: a prospective cohort study. *Gut* 59:39-48.

Stemmermann,G.N., Nomura,A.M., Chyou,P.H., and Yoshizawa,C. 1990. Prospective study of alcohol intake and large bowel cancer. *Dig. Dis. Sci.* 35:1414-1420.

Sung,N.Y., Choi,K.S., Park,E.C., Park,K., Lee,S.Y., Lee,A.K., Choi,I.J., Jung,K.W., Won,Y.J., and Shin,H.R. 2007. Smoking, alcohol and gastric cancer risk in Korean men: the National Health Insurance Corporation Study. *Br. J. Cancer* 97:700-704.

Unakami,M., Hara,M., Fukuchi,S., and Akiyama,H. 1989. Cancer of the gastric cardia and the habit of smoking. *Acta Pathol. Jpn.* 39:420-424.

Wu-Williams,A.H., Yu,M.C., and Mack,T.M. 1990. Life-style, workplace, and stomach cancer by subsite in young men of Los Angeles County. *Cancer Res.* 50:2569-2576.

Wu,A.H., Wan,P., and Bernstein,L. 2001. A multiethnic population-based study of smoking, alcohol and body size and risk of adenocarcinomas of the stomach and esophagus (United States). *Cancer Causes Control* 12:721-732.

WYNDER,E.L., KMET,J., DUNGAL,N., and SEGI,M. 1963. AN EPIDEMIOLOGICAL INVESTIGATION OF GASTRIC CANCER. *Cancer* 16:1461-1496.

Ye,W., Ekstrom,A.M., Hansson,L.E., Bergstrom,R., and Nyren,O. 1999. Tobacco, alcohol and the risk of gastric cancer by sub-site and histologic type. *Int. J. Cancer* 83:223-229.

Yi,S.W., Sull,J.W., Linton,J.A., Nam,C.M., and Ohrr,H. 2010. Alcohol consumption and digestive cancer mortality in Koreans: the Kangwha Cohort Study. *J. Epidemiol.* 20:204-211.

Yuan,J.M., Ross,R.K., Gao,Y.T., Henderson,B.E., and Yu,M.C. 1997. Follow up study of moderate alcohol intake and mortality among middle aged men in Shanghai, China. *BMJ* 314:18-23.

Zhang,Z.F., Kurtz,R.C., Sun,M., Karpeh,M., Jr., Yu,G.P., Gargon,N., Fein,J.S., Georgopoulos,S.K., and Harlap,S. 1996. Adenocarcinomas of the esophagus and gastric cardia: medical conditions, tobacco, alcohol, and socioeconomic factors. *Cancer Epidemiol. Biomarkers Prev.* 5:761-768.

## Small Intestine

Boffetta,P., Hazelton,W.D., Chen,Y., Sinha,R., Inoue,M., Gao,Y.T., Koh,W.P., Shu,X.O., Grant,E.J., Tsuji,I., Nishino,Y., You,S.L., Yoo,K.Y., Yuan,J.M., Kim,J., Tsugane,S., Yang,G., Wang,R., Xiang,Y.B., Ozasa,K., Nagai,M., Kakizaki,M., Chen,C.J., Park,S.K., Shin,A., Ahsan,H., Qu,C.X., Lee,J.E., Thornquist,M., Rolland,B., Feng,Z., Zheng,W., and Potter,J.D. 2012. Body mass, tobacco smoking, alcohol drinking and risk of cancer of the small intestine--a pooled analysis of over 500,000 subjects in the Asia Cohort Consortium. *Ann Oncol* 23:1894-1898.

Chow,W.H., Linet,M.S., McLaughlin,J.K., Hsing,A.W., Chien,H.T., and Blot,W.J. 1993. Risk factors for small intestine cancer. *Cancer Causes Control* 4:163-169.

Hassan,M.M., Phan,A., Li,D., Dagohoy,C.G., Leary,C., and Yao,J.C. 2008. Risk factors associated with neuroendocrine tumors: A U.S.-based case-control study. *Int. J. Cancer* 123:867-873.

Kaerlev,L., Teglbaerg,P.S., Sabroe,S., Kolstad,H.A., Ahrens,W., Eriksson,M., Gue-  
nel,P., Hardell,L., Launoy,G., Merler,E., Merletti,F., Stang,A., and Olsen,J. 2000. Is there an association between alcohol intake or smoking and small bowel adenocarcinoma? Results from a European multi-center case-control study. *Cancer Causes Control* 11:791-797.

Negri,E., Bosetti,C., La Vecchia,C., Fioretti,F., Conti,E., and Franceschi,S. 1999. Risk factors for adenocarcinoma of the small intestine. *Int. J. Cancer* 82:171-174.

## Colorectum

Akhter,M., Kuriyama,S., Nakaya,N., Shimazu,T., Ohmori,K., Nishino,Y., Tsubono,Y., Fukao,A., and Tsuji,I. 2007. Alcohol consumption is associated with an increased risk of distal colon and rectal cancer in Japanese men: the Miyagi Cohort Study. *Eur. J. Cancer* 43:383-390.

Allen,N.E., Beral,V., Casabonne,D., Kan,S.W., Reeves,G.K., Brown,A., and Green,J. 2009. Moderate alcohol intake and cancer incidence in women  
10. *J. Natl. Cancer Inst.* 101:296-305.

Barra,S., Negri,E., Franceschi,S., Guarneri,S., and La Vecchia,C. 1992. Alcohol and colorectal cancer: a case-control study from northern Italy. *Cancer Causes Control* 3:153-159.

Benedetti,A., Parent,M.E., and Siemiatycki,J. 2009. Lifetime consumption of alcoholic beverages and risk of 13 types of cancer in men: results from a case-control study in Montreal  
7. *Cancer Detect. Prev.* 32:352-362.

Bongaerts,B.W., Van den Brandt,P.A., Goldbohm,R.A., de Goeij,A.F., and Weijenberg,M.P. 2008. Alcohol consumption, type of alcoholic beverage and risk of colorectal cancer at specific subsites  
13. *Int. J. Cancer* 123:2411-2417.

Boutron,M.C., Faivre,J., Dop,M.C., Quipourt,V., and Senesse,P. 1995. Tobacco, alcohol, and colorectal tumors: a multistep process. *Am. J. Epidemiol.* 141:1038-1046.

Breslow,R.A., Chen,C.M., Graubard,B.I., and Mukamal,K.J. 2011. Prospective study of alcohol consumption quantity and frequency and cancer-specific mortality in the US population  
2. *Am. J. Epidemiol.* 174:1044-1053.

Camargo,C.A., Jr., Hennekens,C.H., Gaziano,J.M., Glynn,R.J., Manson,J.E., and Stampfer,M.J. 1997. Prospective study of moderate alcohol consumption and mortality in US male physicians. *Arch. Intern. Med.* 157:79-85.

Chen,K., Jiang,Q., Ma,X., Li,Q., Yao,K., Yu,W., and Zheng,S. 2005. Alcohol drinking and colorectal cancer: a population-based prospective cohort study in China. *Eur. J. Epidemiol.* 20:149-154.

Choi,S.Y. and Kahyo,H. 1991. Effect of cigarette smoking and alcohol consumption in the etiology of cancers of the digestive tract. *Int. J. Cancer* 49:381-386.

Chyou,P.H., Nomura,A.M., and Stemmermann,G.N. 1996. A prospective study of colon and rectal cancer among Hawaii Japanese men. *Ann Epidemiol.* 6:276-282.

Crockett,S.D., Long,M.D., Dellon,E.S., Martin,C.F., Galanko,J.A., and Sandler,R.S. 2011. Inverse relationship between moderate alcohol intake and rectal cancer: analysis of the North Carolina Colon Cancer Study  
3. *Dis. Colon Rectum* 54:887-894.

Ferrari,P., Jenab,M., Norat,T., Moskal,A., Slimani,N., Olsen,A., Tjonneland,A., Overvad,K., Jensen,M.K., Boutron-Ruault,M.C., Clavel-Chapelon,F., Morois,S., Rohrmann,S., Linseisen,J., Boeing,H., Bergmann,M., Kontopoulou,D., Trichopoulou,A., Kaspas,C., Masala,G., Krogh,V., Vineis,P., Panico,S., Tumino,R., van Gils,C.H., Peeters,P., Bueno-de-Mesquita,H.B., Ocke,M.C., Skeie,G., Lund,E., Agudo,A., Ardanaz,E., Lopez,D.C., Sanchez,M.J., Quiros,J.R., Amiano,P., Berglund,G., Manjer,J., Palmqvist,R., Van,G.B., Allen,N., Key,T., Bingham,S., Mazuir,M., Boffetta,P., Kaaks,R., and Riboli,E. 2007. Lifetime and baseline alcohol intake and risk of colon and rectal cancers in the European prospective investigation into cancer and nutrition (EPIC). *Int. J. Cancer* 121:2065-2072.

Flood,A., Caprario,L., Chatterjee,N., Lacey,J.V., Jr., Schairer,C., and Schatzkin,A. 2002. Folate, methionine, alcohol, and colorectal cancer in a prospective study of women in the United States. *Cancer Causes Control* 13:551-561.

Gao,C.M., Takezaki,T., Wu,J.Z., Zhang,X.M., Cao,H.X., Ding,J.H., Liu,Y.T., Li,S.P., Cao,J., Matsuo,K., Hamajima,N., and Tajima,K. 2008. Polymorphisms of alcohol dehydrogenase 2 and aldehyde dehydrogenase 2 and colorectal cancer risk in Chinese males  
12. *World J. Gastroenterol.* 14:5078-5083.

Gapstur,S.M., Potter,J.D., and Folsom,A.R. 1994. Alcohol consumption and colon and rectal cancer in postmenopausal women. *Int. J. Epidemiol.* 23:50-57.

Gaziano,J.M., Gaziano,T.A., Glynn,R.J., Sesso,H.D., Ajani,U.A., Stampfer,M.J., Manson,J.E., Hennekens,C.H., and Buring,J.E. 2000. Light-to-moderate alcohol consumption and mortality in the Physicians' Health Study enrollment cohort. *J. Am. Coll. Cardiol.* 35:96-105.

Gerhardsson,d., V, Romelsjo,A., and Lundberg,M. 1993. Alcohol and cancer of the colon and rectum. *Eur. J. Cancer Prev.* 2:401-408.

Goldbohm,R.A., Van den Brandt,P.A., Van,!, V, Dorant,E., Sturmans,F., and Hermus,R.J. 1994. Prospective study on alcohol consumption and the risk of cancer of the colon and rectum in the Netherlands. *Cancer Causes Control* 5:95-104.

Hassan,M.M., Phan,A., Li,D., Dagohey,C.G., Leary,C., and Yao,J.C. 2008. Risk factors associated with neuroendocrine tumors: A U.S.-based case-control study  
16. *Int. J. Cancer* 123:867-873.

Ho,J.W., Lam,T.H., Tse,C.W., Chiu,L.K., Lam,H.S., Leung,P.F., Ng,K.C., Ho,S.Y., Woo,J., Leung,S.S., and Yuen,S.T. 2004. Smoking, drinking and colorectal cancer in Hong Kong Chinese: a case-control study. *Int. J. Cancer* 109:587-597.

Hoshiyama,Y., Sekine,T., and Sasaba,T. 1993. A case-control study of colorectal cancer and its relation to diet, cigarettes, and alcohol consumption in Saitama Prefecture, Japan. *Tohoku J. Exp. Med.* 171:153-165.

Hu,J., Morrison,H., Mery,L., DesMeules,M., and Macleod,M. 2007. Diet and vitamin or mineral supplementation and risk of colon cancer by subsite in Canada. *Eur. J. Cancer Prev.* 16:275-291.

Ji,B.T., Dai,Q., Gao,Y.T., Hsing,A.W., McLaughlin,J.K., Fraumeni,J.F., Jr., and Chow,W.H. 2002. Cigarette and alcohol consumption and the risk of colorectal cancer in Shanghai, China. *Eur. J. Cancer Prev.* 11:237-244.

Kabat,G.C., Miller,A.B., Jain,M., and Rohan,T.E. 2008. Dietary intake of selected B vitamins in relation to risk of major cancers in women  
15. *Br. J. Cancer* 99:816-821.

Kim,J., Kim,D.H., Lee,B.H., Kang,S.H., Lee,H.J., Lim,S.Y., Suh,Y.K., and Ahn,Y.O. 2009. Folate intake and the risk of colorectal cancer in a Korean population  
9. *Eur. J. Clin. Nutr.* 63:1057-1064.

Kim,M.K., Ko,M.J., and Han,J.T. 2010. Alcohol consumption and mortality from all-cause and cancers among 1.34 million Koreans: the results from the Korea national health insurance corporation's health examinee cohort in 2000  
4. *Cancer Causes Control* 21:2295-2302.

Klatsky,A.L., Armstrong,M.A., Friedman,G.D., and Hiatt,R.A. 1988. The relations of alcoholic beverage use to colon and rectal cancer. *Am. J. Epidemiol.* 128:1007-1015.

Kono,S., Ikeda,M., Tokudome,S., Nishizumi,M., and Kuratsune,M. 1987. Cigarette smoking, alcohol and cancer mortality: a cohort study of male Japanese physicians. *Jpn. J. Cancer Res.* 78:1323-1328.

Kune,S., Kune,G.A., and Watson,L.F. 1987. Case-control study of alcoholic beverages as etiological factors: the Melbourne Colorectal Cancer Study. *Nutr. Cancer* 9:43-56.

Lightfoot,T.J., Barrett,J.H., Bishop,T., Northwood,E.L., Smith,G., Wilkie,M.J., Steele,R.J., Carey,F.A., Key,T.J., Wolf,R., and Forman,D. 2008. Methylene tetrahydrofolate reductase genotype modifies the chemopreventive effect of folate in colorectal adenoma, but not colorectal cancer

14. *Cancer Epidemiol. Biomarkers Prev.* 17:2421-2430.

Lim,H.J. and Park,B.J. 2008. [Cohort study on the association between alcohol consumption and the risk of colorectal cancer in the Korean elderly]. *J. Prev. Med. Public Health* 41:23-29.

Longnecker,M.P. 1990. A case-control study of alcoholic beverage consumption in relation to risk of cancer of the right colon and rectum in men. *Cancer Causes Control* 1:5-14.

Morita,M., Le,M.L., Kono,S., Yin,G., Toyomura,K., Nagano,J., Mizoue,T., Mibu,R., Tanaka,M., Kakeji,Y., Maehara,Y., Okamura,T., Ikejiri,K., Futami,K., Maekawa,T., Yasunami,Y., Takenaka,K., Ichimiya,H., and Imaizumi,N. 2009. Genetic polymorphisms of CYP2E1 and risk of colorectal cancer: the Fukuoka Colorectal Cancer Study

11. *Cancer Epidemiol. Biomarkers Prev.* 18:235-241.

Murata,M., Takayama,K., Choi,B.C., and Pak,A.W. 1996. A nested case-control study on alcohol drinking, tobacco smoking, and cancer. *Cancer Detect. Prev.* 20:557-565.

Murata,M., Tagawa,M., Watanabe,S., Kimura,H., Takeshita,T., and Morimoto,K. 1999. Genotype difference of aldehyde dehydrogenase 2 gene in alcohol drinkers influences the incidence of Japanese colorectal cancer patients. *Jpn. J. Cancer Res.* 90:711-719.

Murtaugh,M.A., Ma,K.N., Caan,B.J., and Slattery,M.L. 2004. Association of fluids from beverages with risk of rectal cancer. *Nutr. Cancer* 49:25-31.

Nakaya,N., Tsubono,Y., Kuriyama,S., Hozawa,A., Shimazu,T., Kurashima,K., Fukudo,S., Shibuya,D., and Tsuji,I. 2005. Alcohol consumption and the risk of cancer in Japanese men: the Miyagi cohort study. *Eur. J. Cancer Prev.* 14:169-174.

Newcomb,P.A., Storer,B.E., and Marcus,P.M. 1993. Cancer of the large bowel in women in relation to alcohol consumption: a case-control study in Wisconsin (United States). *Cancer Causes Control* 4:405-411.

Otani,T., Iwasaki,M., Yamamoto,S., Sobue,T., Hanaoka,T., Inoue,M., and Tsugane,S. 2003. Alcohol consumption, smoking, and subsequent risk of colorectal cancer in middle-aged and elderly Japanese men and women: Japan Public Health Center-based prospective study. *Cancer Epidemiol. Biomarkers Prev.* 12:1492-1500.

Ozasa,K. 2007. Alcohol use and mortality in the Japan Collaborative Cohort Study for Evaluation of Cancer (JACC). *Asian Pac. J. Cancer Prev.* 8 Suppl:81-88.

Pedersen,A., Johansen,C., and Gronbaek,M. 2003. Relations between amount and type of alcohol and colon and rectal cancer in a Danish population based cohort study. *Gut* 52:861-867.

Peters,R.K., Garabrant,D.H., Yu,M.C., and Mack,T.M. 1989. A case-control study of occupational and dietary factors in colorectal cancer in young men by subsite. *Cancer Res.* 49:5459-5468.

Peters,R.K., Pike,M.C., Garabrant,D., and Mack,T.M. 1992. Diet and colon cancer in Los Angeles County, California. *Cancer Causes Control* 3:457-473.

Potter,J.D. and McMichael,A.J. 1986. Diet and cancer of the colon and rectum: a case-control study. *J. Natl. Cancer Inst.* 76:557-569.

Riboli,E., Cornee,J., Macquart-Moulin,G., Kaaks,R., Casagrande,C., and Guyader,M. 1991. Cancer and polyps of the colorectum and lifetime consumption of beer and other alcoholic beverages. *Am. J. Epidemiol.* 134:157-166.

Sanjoaquin,M.A., Appleby,P.N., Thorogood,M., Mann,J.I., and Key,T.J. 2004. Nutrition, lifestyle and colorectal cancer incidence: a prospective investigation of 10998 vegetarians and non-vegetarians in the United Kingdom. *Br. J. Cancer* 90:118-121.

Sharpe,C.R., Siemiatycki,J., and Rachet,B. 2002. Effects of alcohol consumption on the risk of colorectal cancer among men by anatomical subsite (Canada). *Cancer Causes Control* 13:483-491.

Shimizu,N., Nagata,C., Shimizu,H., Kametani,M., Takeyama,N., Ohnuma,T., and Matsushita,S. 2003. Height, weight, and alcohol consumption in relation to the risk of colorectal cancer in Japan: a prospective study. *Br. J. Cancer* 88:1038-1043.

Slattery,M.L., West,D.W., Robison,L.M., French,T.K., Ford,M.H., Schuman,K.L., and Sorrenson,A.W. 1990. Tobacco, alcohol, coffee, and caffeine as risk factors for colon cancer in a low-risk population. *Epidemiology* 1:141-145.

Stern,M.C., Conti,D.V., Siegmund,K.D., Corral,R., Yuan,J.M., Koh,W.P., and Yu,M.C. 2007. DNA repair single-nucleotide polymorphisms in colorectal cancer and their role as modifiers of the effect of cigarette smoking and alcohol in the Singapore Chinese Health Study. *Cancer Epidemiol. Biomarkers Prev.* 16:2363-2372.



Su,L.J. and Arab,L. 2004. Alcohol consumption and risk of colon cancer: evidence from the national health and nutrition examination survey I epidemiologic follow-up study. *Nutr. Cancer* 50:111-119.

Tavani,A., Ferraroni,M., Mezzetti,M., Franceschi,S., Lo,R.A., and La Vecchia,C. 1998. Alcohol intake and risk of cancers of the colon and rectum. *Nutr. Cancer* 30:213-219.

Thun,M.J., Peto,R., Lopez,A.D., Monaco,J.H., Henley,S.J., Heath,C.W., Jr., and Doll,R. 1997. Alcohol consumption and mortality among middle-aged and elderly U.S. adults. *N. Engl. J. Med.* 337:1705-1714.

Thygesen,L.C., Wu,K., Gronbaek,M., Fuchs,C.S., Willett,W.C., and Giovannucci,E. 2008. Alcohol intake and colorectal cancer: a comparison of approaches for including repeated measures of alcohol consumption. *Epidemiology* 19:258-264.

Toriola,A.T., Kurl,S., Laukanen,J.A., Mazengo,C., and Kauhanen,J. 2008. Alcohol consumption and risk of colorectal cancer: the Findrink study  
17. *Eur. J. Epidemiol.* 23:395-401.

Tsong,W.H., Koh,W.P., Yuan,J.M., Wang,R., Sun,C.L., and Yu,M.C. 2007. Cigarettes and alcohol in relation to colorectal cancer: the Singapore Chinese Health Study. *Br. J. Cancer* 96:821-827.

Wakai,K., Kojima,M., Tamakoshi,K., Watanabe,Y., Hayakawa,N., Suzuki,K., Hashimoto,S., Kawado,M., Tokudome,S., Suzuki,S., Ozasa,K., Toyoshima,H., Ito,Y., and Tamakoshi,A. 2005. Alcohol consumption and colorectal cancer risk: findings from the JACC Study. *J. Epidemiol.* 15 Suppl 2:S173-S179.

Wei,E.K., Giovannucci,E., Wu,K., Rosner,B., Fuchs,C.S., Willett,W.C., and Colditz,G.A. 2004. Comparison of risk factors for colon and rectal cancer. *Int. J. Cancer* 108:433-442.

Wernli,K.J., Wang,Y., Zheng,Y., Potter,J.D., and Newcomb,P.A. 2009. The relationship between gravidity and parity and colorectal cancer risk  
8. *J. Womens Health (Larchmt.)* 18:995-1001.

Wu,A.H., Paganini-Hill,A., Ross,R.K., and Henderson,B.E. 1987. Alcohol, physical activity and other risk factors for colorectal cancer: a prospective study. *Br. J. Cancer* 55:687-694.

Yamada,K., Araki,S., Tamura,M., Sakai,I., Takahashi,Y., Kashihara,H., and Kono,S. 1997. Case-control study of colorectal carcinoma in situ and cancer in relation to cigarette smoking and alcohol use (Japan). *Cancer Causes Control* 8:780-785.

Yamamoto,S., Nakagawa,T., Matsushita,Y., Kusano,S., Hayashi,T., Irokawa,M., Aoki,T., Korogi,Y., and Mizoue,T. 2010. Visceral fat area and markers of insulin resistance in relation to colorectal neoplasia  
6. Diabetes Care 33:184-189.

Yi,S.W., Sull,J.W., Linton,J.A., Nam,C.M., and Ohrr,H. 2010. Alcohol consumption and digestive cancer mortality in Koreans: the Kangwha Cohort Study  
5. J. Epidemiol. 20:204-211.

Yuan,J.M., Ross,R.K., Gao,Y.T., Henderson,B.E., and Yu,M.C. 1997. Follow up study of moderate alcohol intake and mortality among middle aged men in Shanghai, China.  
BMJ 314:18-23.

Zhao,J., Zhu,Y., Wang,P.P., West,R., Buehler,S., Sun,Z., Squires,J., Roebathan,B., McLaughlin,J.R., Campbell,P.T., and Parfrey,P.S. 2012. Interaction between alcohol drinking and obesity in relation to colorectal cancer risk: a case-control study in Newfoundland and Labrador, Canada  
1. BMC. Public Health 12:94.

## Liver

Allen,N.E., Beral,V., Casabonne,D., Kan,S.W., Reeves,G.K., Brown,A., and Green,J. 2009. Moderate alcohol intake and cancer incidence in women. *J. Natl. Cancer Inst.* 101:296-305.

Benedetti,A., Parent,M.E., and Siemiatycki,J. 2009. Lifetime consumption of alcoholic beverages and risk of 13 types of cancer in men: results from a case-control study in Montreal. *Cancer Detect. Prev.* 32:352-362.

Chen,C.J., Wang,L.Y., Lu,S.N., Wu,M.H., You,S.L., Zhang,Y.J., Wang,L.W., and Santella,R.M. 1996. Elevated aflatoxin exposure and increased risk of hepatocellular carcinoma. *Hepatology* 24:38-42.

Choi,S.Y. and Kahyo,H. 1991. Effect of cigarette smoking and alcohol consumption in the etiology of cancers of the digestive tract. *Int. J. Cancer* 49:381-386.

Cordier,S., Le,T.B., Verger,P., Bard,D., Le,C.D., Larouze,B., Dazza,M.C., Hoang,T.Q., and Abenhaim,L. 1993. Viral infections and chemical exposures as risk factors for hepatocellular carcinoma in Vietnam. *Int. J. Cancer* 55:196-201.

Donato,F., Gelatti,U., Tagger,A., Favret,M., Ribero,M.L., Callea,F., Martelli,C., Savio,A., Trevisi,P., and Nardi,G. 2001. Intrahepatic cholangiocarcinoma and hepatitis C and B virus infection, alcohol intake, and hepatolithiasis: a case-control study in Italy. *Cancer Causes Control* 12:959-964.

Donato,F., Tagger,A., Gelatti,U., Parrinello,G., Boffetta,P., Albertini,A., Decarli,A., Trevisi,P., Ribero,M.L., Martelli,C., Porru,S., and Nardi,G. 2002. Alcohol and hepatocellular carcinoma: the effect of lifetime intake and hepatitis virus infections in men and women. *Am. J. Epidemiol.* 155:323-331.

Franceschi,S., Montella,M., Polesel,J., La Vecchia,C., Crispo,A., Dal,M.L., Casarin,P., Izzo,F., Tommasi,L.G., Chemin,I., Trepo,C., Crotto,M., and Talamini,R. 2006. Hepatitis viruses, alcohol, and tobacco in the etiology of hepatocellular carcinoma in Italy. *Cancer Epidemiol. Biomarkers Prev.* 15:683-689.

Hassan,M.M., Hwang,L.Y., Hatten,C.J., Swaim,M., Li,D., Abbruzzese,J.L., Beasley,P., and Patt,Y.Z. 2002. Risk factors for hepatocellular carcinoma: synergism of alcohol with viral hepatitis and diabetes mellitus. *Hepatology* 36:1206-1213.

Hassan,M.M., Kaseb,A., Li,D., Patt,Y.Z., Vauthey,J.N., Thomas,M.B., Curley,S.A., Spitz,M.R., Sherman,S.I., Abdalla,E.K., Davila,M., Lozano,R.D., Hassan,D.M., Chan,W., Brown,T.D., and Abbruzzese,J.L. 2009. Association between hypothyroidism and hepa-

tocellular carcinoma: a case-control study in the United States. *Hepatology* 49:1563-1570.

Jee,S.H., Ohrr,H., Sull,J.W., and Samet,J.M. 2004. Cigarette smoking, alcohol drinking, hepatitis B, and risk for hepatocellular carcinoma in Korea. *J. Natl. Cancer Inst.* 96:1851-1856.

Joshi,S., Song,Y.M., Kim,T.H., and Cho,S.I. 2008. Socio-economic status and the risk of liver cancer mortality: a prospective study in Korean men. *Public Health* 122:1144-1151.

Kim,M.K., Ko,M.J., and Han,J.T. 2010. Alcohol consumption and mortality from all-cause and cancers among 1.34 million Koreans: the results from the Korea national health insurance corporation's health examinee cohort in 2000. *Cancer Causes Control* 21:2295-2302.

Koh,W.P., Robien,K., Wang,R., Govindarajan,S., Yuan,J.M., and Yu,M.C. 2011. Smoking as an independent risk factor for hepatocellular carcinoma: the Singapore Chinese Health Study. *Br. J. Cancer* 105:1430-1435.

Kono,S., Ikeda,M., Tokudome,S., Nishizumi,M., and Kuratsune,M. 1987. Cigarette smoking, alcohol and cancer mortality: a cohort study of male Japanese physicians. *Jpn. J. Cancer Res.* 78:1323-1328.

Kuper,H., Tzonou,A., Kaklamani,E., Hsieh,C.C., Laggiou,P., Adami,H.O., Trichopoulos,D., and Stuver,S.O. 2000. Tobacco smoking, alcohol consumption and their interaction in the causation of hepatocellular carcinoma. *Int. J. Cancer* 85:498-502.

La Vecchia,C., Negri,E., Cavalieri,d.L., and Franceschi,S. 1998. Liver cirrhosis and the risk of primary liver cancer. *Eur. J. Cancer Prev.* 7:315-320.

Mayans,M.V., Calvet,X., Bruix,J., Bruguera,M., Costa,J., Esteve,J., Bosch,F.X., Bru,C., and Rodes,J. 1990. Risk factors for hepatocellular carcinoma in Catalonia, Spain. *Int. J. Cancer* 46:378-381.

Mohamed,A.E., Kew,M.C., and Groeneveld,H.T. 1992. Alcohol consumption as a risk factor for hepatocellular carcinoma in urban southern African blacks. *Int. J. Cancer* 51:537-541.

Murata,M., Takayama,K., Choi,B.C., and Pak,A.W. 1996. A nested case-control study on alcohol drinking, tobacco smoking, and cancer. *Cancer Detect. Prev.* 20:557-565.

Nakaya,N., Tsubono,Y., Kuriyama,S., Hozawa,A., Shimazu,T., Kurashima,K., Fukudo,S., Shibuya,D., and Tsuji,I. 2005. Alcohol consumption and the risk of cancer in Japanese men: the Miyagi cohort study. *Eur. J. Cancer Prev.* 14:169-174.

Ohishi,W., Fujiwara,S., Cologne,J.B., Suzuki,G., Akahoshi,M., Nishi,N., Takahashi,I., and Chayama,K. 2008. Risk factors for hepatocellular carcinoma in a Japanese population: a nested case-control study. *Cancer Epidemiol. Biomarkers Prev.* 17:846-854.

Ozasa,K. 2007. Alcohol use and mortality in the Japan Collaborative Cohort Study for Evaluation of Cancer (JACC). *Asian Pac. J. Cancer Prev.* 8 Suppl:81-88.

Pyong,S.J., Tsukuma,H., and Hiyama,T. 1994. Case-control study of hepatocellular carcinoma among Koreans living in Osaka, Japan. *Jpn. J. Cancer Res.* 85:674-679.

Sakamoto,T., Hara,M., Higaki,Y., Ichiba,M., Horita,M., Mizuta,T., Eguchi,Y., Yasutake,T., Ozaki,I., Yamamoto,K., Onohara,S., Kawazoe,S., Shigematsu,H., Koizumi,S., and Tanaka,K. 2006. Influence of alcohol consumption and gene polymorphisms of ADH2 and ALDH2 on hepatocellular carcinoma in a Japanese population. *Int. J. Cancer* 118:1501-1507.

Shaib,Y.H., El-Serag,H.B., Nooka,A.K., Thomas,M., Brown,T.D., Patt,Y.Z., and Hassan,M.M. 2007. Risk factors for intrahepatic and extrahepatic cholangiocarcinoma: a hospital-based case-control study. *Am. J. Gastroenterol.* 102:1016-1021.

Stemhagen,A., Slade,J., Altman,R., and Bill,J. 1983. Occupational risk factors and liver cancer. A retrospective case-control study of primary liver cancer in New Jersey. *Am. J. Epidemiol.* 117:443-454.

Trichopoulos,D., Day,N.E., Kaklamani,E., Tzonou,A., Munoz,N., Zavitsanos,X., Koumantaki,Y., and Trichopoulou,A. 1987. Hepatitis B virus, tobacco smoking and ethanol consumption in the etiology of hepatocellular carcinoma. *Int. J. Cancer* 39:45-49.

Trichopoulos,D., Bamia,C., Lagiou,P., Fedirko,V., Trepo,E., Jenab,M., Pischon,T., Nothlings,U., Overved,K., Tjonneland,A., Outzen,M., Clavel-Chapelon,F., Kaaks,R., Lukanova,A., Boeing,H., Aleksandrova,K., Benetou,V., Zylis,D., Palli,D., Pala,V., Panico,S., Tumino,R., Sacerdote,C., Bueno-De-Mesquita,H.B., Van Kranen,H.J., Peeters,P.H., Lund,E., Quiros,J.R., Gonzalez,C.A., Sanchez Perez,M.J., Navarro,C., Dorronsoro,M., Barricarte,A., Lindkvist,B., Regner,S., Werner,M., Hallmans,G., Khaw,K.T., Wareham,N., Key,T., Romieu,I., Chuang,S.C., Murphy,N., Boffetta,P., Trichopoulou,A., and Riboli,E. 2011. Hepatocellular carcinoma risk factors and disease burden in a European cohort: a nested case-control study. *J. Natl. Cancer Inst.* 103:1686-1695.

Yi,S.W., Sull,J.W., Linton,J.A., Nam,C.M., and Ohrr,H. 2010. Alcohol consumption and digestive cancer mortality in Koreans: the Kangwha Cohort Study. *J. Epidemiol.* 20:204-211.

Yu,H., Harris,R.E., Kabat,G.C., and Wynder,E.L. 1988. Cigarette smoking, alcohol consumption and primary liver cancer: a case-control study in the USA. *Int. J. Cancer* 42:325-328.

Yu,M.C., Mack,T., Hanisch,R., Peters,R.L., Henderson,B.E., and Pike,M.C. 1983. Hepatitis, alcohol consumption, cigarette smoking, and hepatocellular carcinoma in Los Angeles. *Cancer Res.* 43:6077-6079.

Yuan,J.M., Govindarajan,S., Arakawa,K., and Yu,M.C. 2004. Synergism of alcohol, diabetes, and viral hepatitis on the risk of hepatocellular carcinoma in blacks and whites in the U.S. *Cancer* 101:1009-1017.

Yuan,J.M., Gao,Y.T., Ong,C.N., Ross,R.K., and Yu,M.C. 2006. Prediagnostic level of serum retinol in relation to reduced risk of hepatocellular carcinoma. *J. Natl. Cancer Inst.* 98:482-490.

Yun,E.H., Lim,M.K., Oh,J.K., Park,J.H., Shin,A., Sung,J., and Park,E.C. 2010. Combined effect of socioeconomic status, viral hepatitis, and lifestyles on hepatocellular carcinoma risk in Korea. *Br. J. Cancer* 103:741-746.

Zhang,J.Y., Wang,X., Han,S.G., and Zhuang,H. 1998. A case-control study of risk factors for hepatocellular carcinoma in Henan, China. *Am. J. Trop. Med. Hyg.* 59:947-951.

## Gallbladder

Chow,W.H., McLaughlin,J.K., Menck,H.R., and Mack,T.M. 1994. Risk factors for extrahepatic bile duct cancers: Los Angeles County, California (USA). *Cancer Causes Control* 5:267-272.

Ishiguro,S., Inoue,M., Kurahashi,N., Iwasaki,M., Sasazuki,S., and Tsugane,S. 2008. Risk factors of biliary tract cancer in a large-scale population-based cohort study in Japan (JPHC study); with special focus on cholelithiasis, body mass index, and their effect modification. *Cancer Causes Control* 19:33-41.

Murata,M., Takayama,K., Choi,B.C., and Pak,A.W. 1996. A nested case-control study on alcohol drinking, tobacco smoking, and cancer. *Cancer Detect. Prev.* 20:557-565.

Ozasa,K. 2007. Alcohol use and mortality in the Japan Collaborative Cohort Study for Evaluation of Cancer (JACC). *Asian Pac. J. Cancer Prev.* 8 Suppl:81-88.

Shaib,Y.H., El-Serag,H.B., Nooka,A.K., Thomas,M., Brown,T.D., Patt,Y.Z., and Hassan,M.M. 2007. Risk factors for intrahepatic and extrahepatic cholangiocarcinoma: a hospital-based case-control study. *Am. J. Gastroenterol.* 102:1016-1021.

Yagyu,K., Kikuchi,S., Obata,Y., Lin,Y., Ishibashi,T., Kurosawa,M., Inaba,Y., and Tamakoshi,A. 2008. Cigarette smoking, alcohol drinking and the risk of gallbladder cancer death: a prospective cohort study in Japan. *Int. J. Cancer* 122:924-929.

Yen,S., Hsieh,C.C., and MacMahon,B. 1987. Extrahepatic bile duct cancer and smoking, beverage consumption, past medical history, and oral-contraceptive use. *Cancer* 59:2112-2116.

Yi,S.W., Sull,J.W., Linton,J.A., Nam,C.M., and Ohrr,H. 2010. Alcohol consumption and digestive cancer mortality in Koreans: the Kangwha Cohort Study. *J. Epidemiol.* 20:204-211.

## **Pancreas**

Allen,N.E., Beral,V., Casabonne,D., Kan,S.W., Reeves,G.K., Brown,A., and Green,J. 2009. Moderate alcohol intake and cancer incidence in women. *J. Natl. Cancer Inst.* 101:296-305.

Baghurst,P.A., McMichael,A.J., Slavotinek,A.H., Baghurst,K.I., Boyle,P., and Walker,A.M. 1991. A case-control study of diet and cancer of the pancreas. *Am. J. Epidemiol.* 134:167-179.

Benedetti,A., Parent,M.E., and Siemiatycki,J. 2009. Lifetime consumption of alcoholic beverages and risk of 13 types of cancer in men: results from a case-control study in Montreal. *Cancer Detect. Prev.* 32:352-362.

Bodmer,M., Becker,C., Meier,C., Jick,S.S., and Meier,C.R. 2012. Use of antidiabetic agents and the risk of pancreatic cancer: a case-control analysis. *Am. J. Gastroenterol.* 107:620-626.

Bouchardy,C., Clavel,F., La Vecchia,C., Raymond,L., and Boyle,P. 1990. Alcohol, beer and cancer of the pancreas. *Int. J. Cancer* 45:842-846.

Clavel,F., Benhamou,E., Auquier,A., Tarayre,M., and Flamant,R. 1989. Coffee, alcohol, smoking and cancer of the pancreas: a case-control study. *Int. J. Cancer* 43:17-21.

Cuzick,J. and Babiker,A.G. 1989. Pancreatic cancer, alcohol, diabetes mellitus and gallbladder disease. *Int. J. Cancer* 43:415-421.

de,M.C., Llosa,A.E., Friedman,G.D., Vogelmann,J.H., Orentreich,N., Stolzenberg-Solomon,R.Z., and Parsonnet,J. 2008. Helicobacter pylori infection and development of pancreatic cancer. *Cancer Epidemiol. Biomarkers Prev.* 17:1188-1194.

Falk,R.T., Pickle,L.W., Fontham,E.T., Correa,P., and Fraumeni,J.F., Jr. 1988. Life-style risk factors for pancreatic cancer in Louisiana: a case-control study. *Am. J. Epidemiol.* 128:324-336.

Farrow,D.C. and Davis,S. 1990. Risk of pancreatic cancer in relation to medical history and the use of tobacco, alcohol and coffee. *Int. J. Cancer* 45:816-820.

Gapstur,S.M., Jacobs,E.J., Deka,A., McCullough,M.L., Patel,A.V., and Thun,M.J. 2011. Association of alcohol intake with pancreatic cancer mortality in never smokers. *Arch. Intern. Med.* 171:444-451.

Gaziano,J.M., Gaziano,T.A., Glynn,R.J., Sesso,H.D., Ajani,U.A., Stampfer,M.J., Manson,J.E., Hennekens,C.H., and Buring,J.E. 2000. Light-to-moderate alcohol consump-



tion and mortality in the Physicians' Health Study enrollment cohort. *J. Am. Coll. Cardiol.* 35:96-105.

Genkinger, J.M., Spiegelman, D., Anderson, K.E., Bergkvist, L., Bernstein, L., van den Brandt, P.A., English, D.R., Freudenheim, J.L., Fuchs, C.S., Giles, G.G., Giovannucci, E., Hankinson, S.E., Horn-Ross, P.L., Leitzmann, M., Mannisto, S., Marshall, J.R., McCullough, M.L., Miller, A.B., Reding, D.J., Robien, K., Rohan, T.E., Schatzkin, A., Stevens, V.L., Stolzenberg-Solomon, R.Z., Verhage, B.A., Wolk, A., Ziegler, R.G., and Smith-Warner, S.A. 2009. Alcohol intake and pancreatic cancer risk: a pooled analysis of fourteen cohort studies. *Cancer Epidemiol. Biomarkers Prev.* 18:765-776.

Harnack, L.J., Anderson, K.E., Zheng, W., Folsom, A.R., Sellers, T.A., and Kushi, L.H. 1997. Smoking, alcohol, coffee, and tea intake and incidence of cancer of the exocrine pancreas: the Iowa Women's Health Study. *Cancer Epidemiol. Biomarkers Prev.* 6:1081-1086.

Hassan, M.M., Phan, A., Li, D., Dagohoy, C.G., Leary, C., and Yao, J.C. 2008. Risk factors associated with neuroendocrine tumors: A U.S.-based case-control study. *Int. J. Cancer* 123:867-873.

Heinen, M.M., Verhage, B.A., Ambergen, T.A., Goldbohm, R.A., and van den Brandt, P.A. 2009. Alcohol consumption and risk of pancreatic cancer in the Netherlands cohort study. *Am. J. Epidemiol.* 169:1233-1242.

Hiatt, R.A., Klatsky, A.L., and Armstrong, M.A. 1988. Pancreatic cancer, blood glucose and beverage consumption. *Int. J. Cancer* 41:794-797.

Jiao, L., Silverman, D.T., Schairer, C., Thiebaut, A.C., Hollenbeck, A.R., Leitzmann, M.F., Schatzkin, A., and Stolzenberg-Solomon, R.Z. 2009. Alcohol use and risk of pancreatic cancer: the NIH-AARP Diet and Health Study. *Am. J. Epidemiol.* 169:1043-1051.

Kalapothaki, V., Tzonou, A., Hsieh, C.C., Toupadaki, N., Karakatsani, A., and Trichopoulos, D. 1993. Tobacco, ethanol, coffee, pancreatitis, diabetes mellitus, and cholelithiasis as risk factors for pancreatic carcinoma. *Cancer Causes Control* 4:375-382.

Kim, M.K., Ko, M.J., and Han, J.T. 2010. Alcohol consumption and mortality from all-cause and cancers among 1.34 million Koreans: the results from the Korea national health insurance corporation's health examinee cohort in 2000. *Cancer Causes Control* 21:2295-2302.

Kono, S., Ikeda, M., Tokudome, S., Nishizumi, M., and Kuratsune, M. 1986. Alcohol and mortality: a cohort study of male Japanese physicians. *Int. J. Epidemiol.* 15:527-532.

Lin, Y., Tamakoshi, A., Kawamura, T., Inaba, Y., Kikuchi, S., Motohashi, Y., Kurosawa, M., and Ohno, Y. 2002. Risk of pancreatic cancer in relation to alcohol drinking, coffee consumption and medical history: findings from the Japan collaborative cohort study for evaluation of cancer risk. *Int. J. Cancer* 99:742-746.

Lucenteforte, E., La Vecchia, C., Silverman, D., Petersen, G.M., Bracci, P.M., Ji, B.T., Bosetti, C., Li, D., Gallinger, S., Miller, A.B., Bueno-de-Mesquita, H.B., Talamini, R., Polesel, J., Gadirian, P., Baghurst, P.A., Zatonski, W., Fontham, E., Bamlet, W.R., Holly, E.A., Gao, Y.T., Negri, E., Hassan, M., Cotterchio, M., Su, J., Maisonneuve, P., Boffetta, P., and Duell, E.J. 2012. Alcohol consumption and pancreatic cancer: a pooled analysis in the International Pancreatic Cancer Case-Control Consortium (PanC4). *Ann Oncol* 23:374-382.

Mack, T.M., Yu, M.C., Hanisch, R., and Henderson, B.E. 1986. Pancreas cancer and smoking, beverage consumption, and past medical history. *J. Natl. Cancer Inst.* 76:49-60.

Michaud, D.S., Giovannucci, E., Willett, W.C., Colditz, G.A., and Fuchs, C.S. 2001. Coffee and alcohol consumption and the risk of pancreatic cancer in two prospective United States cohorts. *Cancer Epidemiol. Biomarkers Prev.* 10:429-437.

Murata, M., Takayama, K., Choi, B.C., and Pak, A.W. 1996. A nested case-control study on alcohol drinking, tobacco smoking, and cancer. *Cancer Detect. Prev.* 20:557-565.

Nakamura, K., Nagata, C., Wada, K., Tamai, Y., Tsuji, M., Takatsuka, N., and Shimizu, H. 2011. Cigarette smoking and other lifestyle factors in relation to the risk of pancreatic cancer death: a prospective cohort study in Japan. *Jpn. J. Clin. Oncol* 41:225-231.

Norell, S.E., Ahlbom, A., Erwald, R., Jacobson, G., Lindberg-Navier, I., Olin, R., Tornberg, B., and Wiechel, K.L. 1986. Diet and pancreatic cancer: a case-control study. *Am. J. Epidemiol.* 124:894-902.

Olsen, G.W., Mandel, J.S., Gibson, R.W., Wattenberg, L.W., and Schuman, L.M. 1989. A case-control study of pancreatic cancer and cigarettes, alcohol, coffee and diet. *Am. J. Public Health* 79:1016-1019.

Ozasa, K. 2007. Alcohol use and mortality in the Japan Collaborative Cohort Study for Evaluation of Cancer (JACC). *Asian Pac. J. Cancer Prev.* 8 Suppl:81-88.

Rohrmann, S., Linseisen, J., Vrieling, A., Boffetta, P., Stolzenberg-Solomon, R.Z., Lowenfels, A.B., Jensen, M.K., Overvad, K., Olsen, A., Tjonneland, A., Boutron-Ruault, M.C., Clavel-Chapelon, F., Fagherazzi, G., Misirli, G., Lagiou, P., Trichopoulou, A., Kaaks, R., Bergmann, M.M., Boeing, H., Bingham, S., Khaw, K.T., Allen, N., Roddam, A., Palli, D., Pala, V., Panico, S., Tumino, R., Vineis, P., Peeters, P.H., Hjartaker, A., Lund, E., Redondo Cornejo, M.L., Agudo, A., Arriola, L., Sanchez, M.J., Tormo, M.J., Barricarte, G.A., Lindkvist, B.,

Manjer,J., Johansson,I., Ye,W., Slimani,N., Duell,E.J., Jenab,M., Michaud,D.S., Mouw,T., Riboli,E., and Bueno-de-Mesquita,H.B. 2009. Ethanol intake and the risk of pancreatic cancer in the European Prospective Investigation into Cancer and Nutrition (EPIC). *Cancer Causes Control* 20:785-794.

Shibata,A., Mack,T.M., Paganini-Hill,A., Ross,R.K., and Henderson,B.E. 1994. A prospective study of pancreatic cancer in the elderly. *Int. J. Cancer* 58:46-49.

Sonoyama,T., Sakai,A., Mita,Y., Yasuda,Y., Kawamoto,H., Yagi,T., Yoshioka,M., Mimura,T., Nakachi,K., Ouchida,M., Yamamoto,K., and Shimizu,K. 2011. TP53 codon 72 polymorphism is associated with pancreatic cancer risk in males, smokers and drinkers. *Mol. Med. Rep.* 4:489-495.

Stevens,R.J., Roddam,A.W., Spencer,E.A., Pirie,K.L., Reeves,G.K., Green,J., and Beral,V. 2009. Factors associated with incident and fatal pancreatic cancer in a cohort of middle-aged women. *Int. J. Cancer* 124:2400-2405.

Stolzenberg-Solomon,R.Z., Pietinen,P., Barrett,M.J., Taylor,P.R., Virtamo,J., and Albanes,D. 2001. Dietary and other methyl-group availability factors and pancreatic cancer risk in a cohort of male smokers. *Am. J. Epidemiol.* 153:680-687.

Suzuki,T., Matsuo,K., Sawaki,A., Mizuno,N., Hiraki,A., Kawase,T., Watanabe,M., Nakamura,T., Yamao,K., Tajima,K., and Tanaka,H. 2008. Alcohol drinking and one-carbon metabolism-related gene polymorphisms on pancreatic cancer risk. *Cancer Epidemiol. Biomarkers Prev.* 17:2742-2747.

Villeneuve,P.J., Johnson,K.C., Hanley,A.J., and Mao,Y. 2000. Alcohol, tobacco and coffee consumption and the risk of pancreatic cancer: results from the Canadian Enhanced Surveillance System case-control project. *Canadian Cancer Registries Epidemiology Research Group. Eur. J. Cancer Prev.* 9:49-58.

Wynder,E.L., Hall,N.E., and Polansky,M. 1983. Epidemiology of coffee and pancreatic cancer. *Cancer Res.* 43:3900-3906.

Yi,S.W., Sull,J.W., Linton,J.A., Nam,C.M., and Ohrr,H. 2010. Alcohol consumption and digestive cancer mortality in Koreans: the Kangwha Cohort Study. *J. Epidemiol.* 20:204-211.

## Larynx

Adelhardt,M., Moller,J.O., and Sand,H.H. 1985. Cancer of the larynx, pharynx, and oesophagus in relation to alcohol and tobacco consumption among Danish brewery workers. *Dan. Med. Bull.* 32:119-123.

Allen,N.E., Beral,V., Casabonne,D., Kan,S.W., Reeves,G.K., Brown,A., and Green,J. 2009. Moderate alcohol intake and cancer incidence in women. *J. Natl. Cancer Inst.* 101:296-305.

Andre,K., Schraub,S., Mercier,M., and Bontemps,P. 1995. Role of alcohol and tobacco in the aetiology of head and neck cancer: a case-control study in the Doubs region of France. *Eur. J. Cancer B Oral Oncol* 31B:301-309.

Bouchardy,C., Hirvonen,A., Coutelle,C., Ward,P.J., Dayer,P., and Benhamou,S. 2000. Role of alcohol dehydrogenase 3 and cytochrome P-4502E1 genotypes in susceptibility to cancers of the upper aerodigestive tract. *Int. J. Cancer* 87:734-740.

Brownson,R.C. and Chang,J.C. 1987. Exposure to alcohol and tobacco and the risk of laryngeal cancer. *Arch. Environ. Health* 42:192-196.

Burch,J.D., Howe,G.R., Miller,A.B., and Semenciw,R. 1981. Tobacco, alcohol, asbestos, and nickel in the etiology of cancer of the larynx: a case-control study. *J. Natl. Cancer Inst.* 67:1219-1224.

Cammarota,G., Galli,J., Cianci,R., De,C.E., Pasceri,V., Palli,D., Masala,G., Buffon,A., Gasbarrini,A., Almadori,G., Paludetti,G., Gasbarrini,G., and Maurizi,M. 2004. Association of laryngeal cancer with previous gastric resection. *Ann Surg.* 240:817-824.

Choi,S.Y. and Kahyo,H. 1991. Effect of cigarette smoking and alcohol consumption in the aetiology of cancer of the oral cavity, pharynx and larynx. *Int. J. Epidemiol.* 20:878-885.

De Stefani,E., Correa,P., Oreggia,F., Leiva,J., Rivero,S., Fernandez,G., Deneo-Pellegrini,H., Zavala,D., and Fontham,E. 1987. Risk factors for laryngeal cancer. *Cancer* 60:3087-3091.

De Stefani,E., Brennan,P., Boffetta,P., Ronco,A., Deneo-Pellegrini,H., Correa,P., Oreggia,F., and Mendilaharsu,M. 2004. Comparison between hypopharyngeal and laryngeal cancers: I-role of tobacco smoking and alcohol drinking. *Cancer Therapy* 2:99-106.

Dosemeci,M., Gokmen,I., Unsal,M., Hayes,R.B., and Blair,A. 1997. Tobacco, alcohol use, and risks of laryngeal and lung cancer by subsite and histologic type in Turkey. *Cancer Causes Control* 8:729-737.

Elwood,J.M., Pearson,J.C., Skippen,D.H., and Jackson,S.M. 1984. Alcohol, smoking, social and occupational factors in the aetiology of cancer of the oral cavity, pharynx and larynx. *Int. J. Cancer* 34:603-612.

Falk,R.T., Pickle,L.W., Brown,L.M., Mason,T.J., Buffler,P.A., and Fraumeni,J.F., Jr. 1989. Effect of smoking and alcohol consumption on laryngeal cancer risk in coastal Texas. *Cancer Res.* 49:4024-4029.

Flanders,W.D., Cann,C.I., Rothman,K.J., and Fried,M.P. 1984. Work-related risk factors for laryngeal cancer. *Am. J. Epidemiol.* 119:23-32.

Freedman,N.D., Schatzkin,A., Leitzmann,M.F., Hollenbeck,A.R., and Abnet,C.C. 2007. Alcohol and head and neck cancer risk in a prospective study. *Br. J. Cancer* 96:1469-1474.

Garavello,W., Bosetti,C., Gallus,S., Maso,L.D., Negri,E., Franceschi,S., and La Vecchia,C. 2006. Type of alcoholic beverage and the risk of laryngeal cancer. *Eur. J. Cancer Prev.* 15:69-73.

Graham,S., Mettlin,C., Marshall,J., Priore,R., Rzepka,T., and Shedd,D. 1981. Dietary factors in the epidemiology of cancer of the larynx. *Am. J. Epidemiol.* 113:675-680.

Guenel,P., Chastang,J.F., Luce,D., Leclerc,A., and Brugere,J. 1988. A study of the interaction of alcohol drinking and tobacco smoking among French cases of laryngeal cancer. *J. Epidemiol. Community Health* 42:350-354.

Hashibe,M., Boffetta,P., Zaridze,D., Shangina,O., Szeszenia-Dabrowska,N., Mates,D., Fabianova,E., Rudnai,P., and Brennan,P. 2007. Contribution of tobacco and alcohol to the high rates of squamous cell carcinoma of the supraglottis and glottis in Central Europe. *Am. J. Epidemiol.* 165:814-820.

Hedberg,K., Vaughan,T.L., White,E., Davis,S., and Thomas,D.B. 1994. Alcoholism and cancer of the larynx: a case-control study in western Washington (United States). *Cancer Causes Control* 5:3-8.

Hinds,M.W., Thomas,D.B., and O'Reilly,H.P. 1979. Asbestos, dental X-rays, tobacco, and alcohol in the epidemiology of laryngeal cancer. *Cancer* 44:1114-1120.

Kim,M.K., Ko,M.J., and Han,J.T. 2010. Alcohol consumption and mortality from all-cause and cancers among 1.34 million Koreans: the results from the Korea national health insurance corporation's health examinee cohort in 2000. *Cancer Causes Control* 21:2295-2302.

Lee,K.W., Kuo,W.R., Tsai,S.M., Wu,D.C., Wang,W.M., Fang,F.M., Chiang,F.Y., Ho,K.Y., Wang,L.F., Tai,C.F., Kao,E.L., Chou,S.H., Lee,C.H., Chai,C.Y., and Ko,Y.C. 2005. Different impact from betel quid, alcohol and cigarette: risk factors for pharyngeal and laryngeal cancer. *Int. J. Cancer* 117:831-836.

Levi,F., Pasche,C., Lucchini,F., Bosetti,C., and La Vecchia,C. 2004. Processed meat and the risk of selected digestive tract and laryngeal neoplasms in Switzerland. *Ann Oncol* 15:346-349.

Lopez-Abente,G., Pollan,M., Monge,V., and Martinez-Vidal,A. 1992. Tobacco smoking, alcohol consumption, and laryngeal cancer in Madrid. *Cancer Detect. Prev.* 16:265-271.

Maier,H. and Tisch,M. 1997. Epidemiology of laryngeal cancer: results of the Heidelberg case-control study. *Acta Otolaryngol. Suppl* 527:160-164.

Matthias,C., Bockmuhl,U., Jahnke,V., Jones,P.W., Hayes,J.D., Aldersea,J., Gilford,J., Bailey,L., Bath,J., Worrall,S.F., Hand,P., Fryer,A.A., and Strange,R.C. 1998. Polymorphism in cytochrome P450 CYP2D6, CYP1A1, CYP2E1 and glutathione S-transferase, GSTM1, GSTM3, GSTT1 and susceptibility to tobacco-related cancers: studies in upper aerodigestive tract cancers. *Pharmacogenetics* 8:91-100.

Menvielle,G., Luce,D., Goldberg,P., and Leclerc,A. 2004. Smoking, alcohol drinking, occupational exposures and social inequalities in hypopharyngeal and laryngeal cancer. *Int. J. Epidemiol.* 33:799-806.

Muscat,J.E. and Wynder,E.L. 1992. Tobacco, alcohol, asbestos, and occupational risk factors for laryngeal cancer. *Cancer* 69:2244-2251.

Newhouse,M.L., Gregory,M.M., and Shannon,H. 1980. Etiology of carcinoma of the larynx. *IARC Sci. Publ.*687-695.

Olsen,J., Sabreo,S., and Fasting,U. 1985. Interaction of alcohol and tobacco as risk factors in cancer of the laryngeal region. *J. Epidemiol. Community Health* 39:165-168.

Peters,E.S., McClean,M.D., Marsit,C.J., LUCKETT,B., and Kelsey,K.T. 2006. Glutathione S-transferase polymorphisms and the synergy of alcohol and tobacco in oral, pharyngeal, and laryngeal carcinoma. *Cancer Epidemiol. Biomarkers Prev.* 15:2196-2202.

Pisa,F.E. and Barbone,F. 2002. Diet and the risk of cancers of the lung, oral cavity and pharynx, and larynx: a population-based case-control study in north-east Italy. *IARC Sci. Publ.* 156:141-143.

Ramroth,H., Dietz,A., and Becher,H. 2004. Interaction effects and population-attributable risks for smoking and alcohol on laryngeal cancer and its subsites. A case-control study from Germany. *Methods Inf. Med.* 43:499-504.

Tuyns,A.J., Esteve,J., Raymond,L., Berrino,F., Benhamou,E., Blanchet,F., Boffetta,P., Crosignani,P., del,M.A., Lehmann,W., and . 1988. Cancer of the larynx/hypopharynx, tobacco and alcohol: IARC international case-control study in Turin and Varese (Italy), Zaragoza and Navarra (Spain), Geneva (Switzerland) and Calvados (France). *Int. J. Cancer* 41:483-491.

Werbrouck,J., De,R.K., Duprez,F., Van,E.M., Rietzschel,E., Bekaert,S., Vral,A., De,N.W., and Thierens,H. 2008. Single-nucleotide polymorphisms in DNA double-strand break repair genes: association with head and neck cancer and interaction with tobacco use and alcohol consumption. *Mutat. Res.* 656:74-81.

Wynder,E.L., BROSS,I.J., and DAY,E. 1956. A study of environmental factors in cancer of the larynx. *Cancer* 9:86-110.

Wynder,E.L., Covey,L.S., Mabuchi,K., and Mushinski,M. 1976. Environmental factors in cancer of the larynx: a second look. *Cancer* 38:1591-1601.

Zagraniski,R.T., Kelsey,J.L., and Walter,S.D. 1986. Occupational risk factors for laryngeal carcinoma: Connecticut, 1975-1980. *Am. J. Epidemiol.* 124:67-76.

Zang,E.A. and Wynder,E.L. 2001. Reevaluation of the confounding effect of cigarette smoking on the relationship between alcohol use and lung cancer risk, with larynx cancer used as a positive control. *Prev. Med.* 32:359-370.

Zheng,W., Blot,W.J., Shu,X.O., Gao,Y.T., Ji,B.T., Ziegler,R.G., and Fraumeni,J.F., Jr. 1992. Diet and other risk factors for laryngeal cancer in Shanghai, China. *Am. J. Epidemiol.* 136:178-191.

## Lung

Allen,N.E., Beral,V., Casabonne,D., Kan,S.W., Reeves,G.K., Brown,A., and Green,J. 2009. Moderate alcohol intake and cancer incidence in women. *J. Natl. Cancer Inst.* 101:296-305.

Bagnardi,V., Randi,G., Lubin,J., Consonni,D., Lam,T.K., Subar,A.F., Goldstein,A.M., Wacholder,S., Bergen,A.W., Tucker,M.A., Decarli,A., Caporaso,N.E., Bertazzi,P.A., and Landi,M.T. 2010. Alcohol consumption and lung cancer risk in the Environment and Genetics in Lung Cancer Etiology (EAGLE) study. *Am. J. Epidemiol.* 171:36-44.

Benedetti,A., Parent,M.E., and Siemiatycki,J. 2006. Consumption of alcoholic beverages and risk of lung cancer: results from two case-control studies in Montreal, Canada. *Cancer Causes Control* 17:469-480.

Benedetti,A., Parent,M.E., and Siemiatycki,J. 2009. Lifetime consumption of alcoholic beverages and risk of 13 types of cancer in men: results from a case-control study in Montreal. *Cancer Detect. Prev.* 32:352-362.

Breslow,R.A., Chen,C.M., Graubard,B.I., and Mukamal,K.J. 2011. Prospective study of alcohol consumption quantity and frequency and cancer-specific mortality in the US population. *Am. J. Epidemiol.* 174:1044-1053.

Carpenter,C.L., Morgenstern,H., and London,S.J. 1998. Alcoholic beverage consumption and lung cancer risk among residents of Los Angeles County. *J. Nutr.* 128:694-700.

Chao,C., Li,Q., Zhang,F., and White,E. 2011. Alcohol consumption and risk of lung cancer in the VITamins And Lifestyle Study. *Nutr. Cancer* 63:880-888.

Connett,J.E., Kuller,L.H., Kjelsberg,M.O., Polk,B.F., Collins,G., Rider,A., and Hulley,S.B. 1989. Relationship between carotenoids and cancer. The Multiple Risk Factor Intervention Trial (MRFIT) Study. *Cancer* 64:126-134.

De,S.E., Correa,P., Fierro,L., Fontham,E.T., Chen,V., and Zavala,D. 1993. The effect of alcohol on the risk of lung cancer in Uruguay. *Cancer Epidemiol. Biomarkers Prev.* 2:21-26.

De,S.E., Correa,P., Deneo-Pellegrini,H., Boffetta,P., Gutierrez,L.P., Ronco,A., Brennan,P., and Mendilaharsu,M. 2002. Alcohol intake and risk of adenocarcinoma of the lung. A case-control study in Uruguay. *Lung Cancer* 38:9-14.

Djousse,L., Dorgan,J.F., Zhang,Y., Schatzkin,A., Hood,M., D'Agostino,R.B., Copenhaver,D.L., Kreger,B.E., and Ellison,R.C. 2002. Alcohol consumption and risk of lung cancer: the Framingham Study. *J. Natl. Cancer Inst.* 94:1877-1882.



Dosemeci,M., Gokmen,I., Unsal,M., Hayes,R.B., and Blair,A. 1997. Tobacco, alcohol use, and risks of laryngeal and lung cancer by subsite and histologic type in Turkey. *Cancer Causes Control* 8:729-737.

Eom,S.Y., Zhang,Y.W., Kim,S.H., Choe,K.H., Lee,K.Y., Park,J.D., Hong,Y.C., Kim,Y.D., Kang,J.W., and Kim,H. 2009. Influence of NQO1, ALDH2, and CYP2E1 genetic polymorphisms, smoking, and alcohol drinking on the risk of lung cancer in Koreans. *Cancer Causes Control* 20:137-145.

Freudenheim,J.L., Ram,M., Nie,J., Muti,P., Trevisan,M., Shields,P.G., Bandera,E.V., Campbell,L.A., McCann,S.E., Schunemann,H.J., Carosella,A.M., Vito,D., Russell,M., Nochajski,T.H., and Goldman,R. 2003. Lung cancer in humans is not associated with lifetime total alcohol consumption or with genetic variation in alcohol dehydrogenase 3 (ADH3). *J. Nutr.* 133:3619-3624.

Freudenheim,J.L., Ritz,J., Smith-Warner,S.A., Albanes,D., Bandera,E.V., van den Brandt,P.A., Colditz,G., Feskanich,D., Goldbohm,R.A., Harnack,L., Miller,A.B., Rimm,E., Rohan,T.E., Sellers,T.A., Virtamo,J., Willett,W.C., and Hunter,D.J. 2005. Alcohol consumption and risk of lung cancer: a pooled analysis of cohort studies. *Am. J. Clin. Nutr.* 82:657-667.

Gaziano,J.M., Gaziano,T.A., Glynn,R.J., Sesso,H.D., Ajani,U.A., Stampfer,M.J., Manson,J.E., Hennekens,C.H., and Buring,J.E. 2000. Light-to-moderate alcohol consumption and mortality in the Physicians' Health Study enrollment cohort. *J. Am. Coll. Cardiol.* 35:96-105.

Hassan,M.M., Phan,A., Li,D., Dagohoy,C.G., Leary,C., and Yao,J.C. 2008. Risk factors associated with neuroendocrine tumors: A U.S.-based case-control study. *Int. J. Cancer* 123:867-873.

Hu,J., Mao,Y., Dryer,D., and White,K. 2002. Risk factors for lung cancer among Canadian women who have never smoked. *Cancer Detect. Prev.* 26:129-138.

Kabat,G.C., Miller,A.B., Jain,M., and Rohan,T.E. 2008. Dietary intake of selected B vitamins in relation to risk of major cancers in women. *Br. J. Cancer* 99:816-821.

Kim,M.K., Ko,M.J., and Han,J.T. 2010. Alcohol consumption and mortality from all-cause and cancers among 1.34 million Koreans: the results from the Korea national health insurance corporation's health examinee cohort in 2000. *Cancer Causes Control* 21:2295-2302.

Kono,S., Ikeda,M., Tokudome,S., Nishizumi,M., and Kuratsune,M. 1986. Alcohol and mortality: a cohort study of male Japanese physicians. *Int. J. Epidemiol.* 15:527-532.

Korte,J.E., Brennan,P., Henley,S.J., and Boffetta,P. 2002. Dose-specific meta-analysis and sensitivity analysis of the relation between alcohol consumption and lung cancer risk. *Am. J. Epidemiol.* 155:496-506.

Murata,M., Takayama,K., Choi,B.C., and Pak,A.W. 1996. A nested case-control study on alcohol drinking, tobacco smoking, and cancer. *Cancer Detect. Prev.* 20:557-565.

Nakaya,N., Tsubono,Y., Kuriyama,S., Hozawa,A., Shimazu,T., Kurashima,K., Fukudo,S., Shibuya,D., and Tsuji,I. 2005. Alcohol consumption and the risk of cancer in Japanese men: the Miyagi cohort study. *Eur. J. Cancer Prev.* 14:169-174.

Nishino,Y., Wakai,K., Kondo,T., Seki,N., Ito,Y., Suzuki,K., Ozasa,K., Watanabe,Y., Ando,M., Tsubono,Y., Tsuji,I., and Tamakoshi,A. 2006. Alcohol consumption and lung cancer mortality in Japanese men: results from Japan collaborative cohort (JACC) study. *J. Epidemiol.* 16:49-56.

Prescott,E., Gronbaek,M., Becker,U., and Sorensen,T.I. 1999. Alcohol intake and the risk of lung cancer: influence of type of alcoholic beverage. *Am. J. Epidemiol.* 149:463-470.

Rohrmann,S., Linseisen,J., Boshuizen,H.C., Whittaker,J., Agudo,A., Vineis,P., Boffetta,P., Jensen,M.K., Olsen,A., Overvad,K., Tjonneland,A., Boutron-Ruault,M.C., Clavel-Chapelon,F., Bergmann,M.M., Boeing,H., Allen,N., Key,T., Bingham,S., Khaw,K.T., Kyriazi,G., Soukara,S., Trichopoulou,A., Panico,S., Palli,D., Sieri,S., Tumino,R., Peeters,P.H., Bueno-de-Mesquita,H.B., Buchner,F.L., Gram,I.T., Lund,E., Ardanaz,E., Chirlaque,M.D., Dorronsoro,M., Perez,M.J., Quiros,J.R., Berglund,G., Janzon,L., Rasmuson,T., Weinehall,L., Ferrari,P., Jenab,M., Norat,T., and Riboli,E. 2006. Ethanol intake and risk of lung cancer in the European Prospective Investigation into Cancer and Nutrition (EPIC). *Am. J. Epidemiol.* 164:1103-1114.

Shimazu,T., Inoue,M., Sasazuki,S., Iwasaki,M., Kurahashi,N., Yamaji,T., and Tsugane,S. 2008. Alcohol and risk of lung cancer among Japanese men: data from a large-scale population-based cohort study, the JPHC study. *Cancer Causes Control* 19:1095-1102.

Stemmermann,G.N., Nomura,A.M., Chyou,P.H., and Yoshizawa,C. 1990. Prospective study of alcohol intake and large bowel cancer. *Dig. Dis. Sci.* 35:1414-1420.

Suzuki,T., Matsuo,K., Hiraki,A., Saito,T., Sato,S., Yatabe,Y., Mitsudomi,T., Hida,T., Ueda,R., and Tajima,K. 2007. Impact of one-carbon metabolism-related gene polymorphisms on risk of lung cancer in Japan: a case control study. *Carcinogenesis* 28:1718-1725.

Takezaki,T., Inoue,M., Kataoka,H., Ikeda,S., Yoshida,M., Ohashi,Y., Tajima,K., and Tominaga,S. 2003. Diet and lung cancer risk from a 14-year population-based prospective study in Japan: with special reference to fish consumption. *Nutr. Cancer* 45:160-167.

Wu,K.S., Zhou,X., Zheng,F., Xu,X.Q., Lin,Y.H., and Yang,J. 2010. Influence of interleukin-1 beta genetic polymorphism, smoking and alcohol drinking on the risk of non-small cell lung cancer. *Clin. Chim. Acta* 411:1441-1446.

Yuan,J.M., Ross,R.K., Gao,Y.T., Henderson,B.E., and Yu,M.C. 1997. Follow up study of moderate alcohol intake and mortality among middle aged men in Shanghai, China. *BMJ* 314:18-23.

Zang,E.A. and Wynder,E.L. 2001. Reevaluation of the confounding effect of cigarette smoking on the relationship between alcohol use and lung cancer risk, with larynx cancer used as a positive control. *Prev. Med.* 32:359-370.

## Melanoma

Allen,N.E., Beral,V., Casabonne,D., Kan,S.W., Reeves,G.K., Brown,A., and Green,J. 2009. Moderate alcohol intake and cancer incidence in women. *J. Natl. Cancer Inst.* 101:296-305.

Bain,C., Green,A., Siskind,V., Alexander,J., and Harvey,P. 1993. Diet and melanoma. An exploratory case-control study. *Ann Epidemiol.* 3:235-238.

Benedetti,A., Parent,M.E., and Siemiatycki,J. 2009. Lifetime consumption of alcoholic beverages and risk of 13 types of cancer in men: results from a case-control study in Montreal. *Cancer Detect. Prev.* 32:352-362.

Freedman,D.M., Sigurdson,A., Doody,M.M., Rao,R.S., and Linet,M.S. 2003. Risk of melanoma in relation to smoking, alcohol intake, and other factors in a large occupational cohort. *Cancer Causes Control* 14:847-857.

Green,A., Bain,C., McLennan,R., and Siskind,V. 1986. Risk factors for cutaneous melanoma in Queensland. *Recent Results Cancer Res.* 102:76-97.

Holman,C.D., Armstrong,B.K., Heenan,P.J., Blackwell,J.B., Cumming,F.J., English,D.R., Holland,S., Kelsall,G.R., Matz,L.R., Rouse,I.L., and . 1986. The causes of malignant melanoma: results from the West Australian Lions Melanoma Research Project. *Recent Results Cancer Res.* 102:18-37.

Kirkpatrick,C.S., White,E., and Lee,J.A. 1994. Case-control study of malignant melanoma in Washington State. II. Diet, alcohol, and obesity. *Am. J. Epidemiol.* 139:869-880.

Le,M.L., Saltzman,B.S., Hankin,J.H., Wilkens,L.R., Franke,A.A., Morris,S.J., and Kolonel,L.N. 2006. Sun exposure, diet, and melanoma in Hawaii Caucasians. *Am. J. Epidemiol.* 164:232-245.

Millen,A.E., Tucker,M.A., Hartge,P., Halpern,A., Elder,D.E., Guerry,D., Holly,E.A., Saggiel,R.W., and Potischman,N. 2004. Diet and melanoma in a case-control study. *Cancer Epidemiol. Biomarkers Prev.* 13:1042-1051.

Naldi,L., Gallus,S., Tavani,A., Imberti,G.L., and La Vecchia,C. 2004. Risk of melanoma and vitamin A, coffee and alcohol: a case-control study from Italy. *Eur. J. Cancer Prev.* 13:503-508.

Osterlind,A., Tucker,M.A., Stone,B.J., and Jensen,O.M. 1988. The Danish case-control study of cutaneous malignant melanoma. IV. No association with nutritional factors, alcohol, smoking or hair dyes. *Int. J. Cancer* 42:825-828.

Stryker,W.S., Stampfer,M.J., Stein,E.A., Kaplan,L., Louis,T.A., Sober,A., and Willett,W.C. 1990. Diet, plasma levels of beta-carotene and alpha-tocopherol, and risk of malignant melanoma. *Am. J. Epidemiol.* 131:597-611.

Vinceti,M., Pellacani,G., Malagoli,C., Bassissi,S., Sieri,S., Bonvicini,F., Krogh,V., and Seidenari,S. 2005. A population-based case-control study of diet and melanoma risk in northern Italy. *Public Health Nutr.* 8:1307-1314.

Westerdahl,J., Olsson,H., Masback,A., Ingvar,C., and Jonsson,N. 1996. Risk of malignant melanoma in relation to drug intake, alcohol, smoking and hormonal factors. *Br. J. Cancer* 73:1126-1131.

## **Breast (female)**

Adami,H.O., Lund,E., Bergstrom,R., and Meirik,O. 1988. Cigarette smoking, alcohol consumption and risk of breast cancer in young women. *Br. J. Cancer* 58:832-837.

Allen,N.E., Beral,V., Casabonne,D., Kan,S.W., Reeves,G.K., Brown,A., and Green,J. 2009. Moderate alcohol intake and cancer incidence in women  
7. *J. Natl. Cancer Inst.* 101:296-305.

Baglietto,L., English,D.R., Gertig,D.M., Hopper,J.L., and Giles,G.G. 2005. Does dietary folate intake modify effect of alcohol consumption on breast cancer risk? Prospective cohort study  
26. *BMJ* 331:807.

Barnes,B.B., Steindorf,K., Hein,R., Flesch-Janys,D., and Chang-Claude,J. 2011. Population attributable risk of invasive postmenopausal breast cancer and breast cancer subtypes for modifiable and non-modifiable risk factors  
10. *Cancer Epidemiol.* 35:345-352.

Baumgartner,K.B., Annegers,J.F., McPherson,R.S., Frankowski,R.F., Gilliland,F.D., and Samet,J.M. 2002. Is alcohol intake associated with breast cancer in Hispanic women? The New Mexico Women's Health Study  
38. *Ethn. Dis.* 12:460-469.

Beasley,J.M., Coronado,G.D., Livaudais,J., Angeles-Llerenas,A., Ortega-Olvera,C., Romieu,I., Lazcano-Ponce,E., and Torres-Mejia,G. 2010. Alcohol and risk of breast cancer in Mexican women  
18. *Cancer Causes Control* 21:863-870.

Benzon,L.S., Vogel,U., Christensen,J., Hansen,R.D., Wallin,H., Overvad,K., Tjonneland,A., and Tolstrup,J. 2010. Interaction between ADH1C Arg(272)Gln and alcohol intake in relation to breast cancer risk suggests that ethanol is the causal factor in alcohol related breast cancer  
17. *Cancer Lett.* 295:191-197.

Berstad,P., Ma,H., Bernstein,L., and Ursin,G. 2008. Alcohol intake and breast cancer risk among young women  
18. *Breast Cancer Res. Treat.* 108:113-120.

Bessaoud,F. and Daures,J.P. 2008. Patterns of alcohol (especially wine) consumption and breast cancer risk: a case-control study among a population in Southern France  
13. *Ann Epidemiol.* 18:467-475.

Bissonauth,V., Shatenstein,B., Fafard,E., Maugard,C., Robidoux,A., Narod,S., and Ghadirian,P. 2009. Risk of breast cancer among French-Canadian women, noncarriers of more frequent BRCA1/2 mutations and consumption of total energy, coffee, and alcohol

1. Breast J. 15 Suppl 1:S63-S71.

Boice,J.D., Jr., Mandel,J.S., and Doody,M.M. 1995. Breast cancer among radiologic technologists. JAMA 274:394-401.

Bowlin,S.J., Leske,M.C., Varma,A., Nasca,P., Weinstein,A., and Caplan,L. 1997. Breast cancer risk and alcohol consumption: results from a large case-control study. Int. J. Epidemiol. 26:915-923.

Breslow,R.A., Chen,C.M., Graubard,B.I., and Mukamal,K.J. 2011. Prospective study of alcohol consumption quantity and frequency and cancer-specific mortality in the US population

5. Am. J. Epidemiol. 174:1044-1053.

Brown,L.M., Gridley,G., Wu,A.H., Falk,R.T., Hauptmann,M., Kolonel,L.N., West,D.W., Nomura,A.M., Pike,M.C., Hoover,R.N., and Ziegler,R.G. 2010. Low level alcohol intake, cigarette smoking and risk of breast cancer in Asian-American women

4. Breast Cancer Res. Treat. 120:203-210.

Buck,K., Vrieling,A., Flesch-Janys,D., and Chang-Claude,J. 2011. Dietary patterns and the risk of postmenopausal breast cancer in a German case-control study

12. Cancer Causes Control 22:273-282.

Chen,W.Y., Colditz,G.A., Rosner,B., Hankinson,S.E., Hunter,D.J., Manson,J.E., Stampfer,M.J., Willett,W.C., and Speizer,F.E. 2002. Use of postmenopausal hormones, alcohol, and risk for invasive breast cancer

39. Ann Intern. Med. 137:798-804.

Chen,W.Y., Rosner,B., Hankinson,S.E., Colditz,G.A., and Willett,W.C. 2011. Moderate alcohol consumption during adult life, drinking patterns, and breast cancer risk

4. JAMA 306:1884-1890.

Chu,S.Y., Lee,N.C., Wingo,P.A., and Webster,L.A. 1989. Alcohol consumption and the risk of breast cancer. Am. J. Epidemiol. 130:867-877.

Cotterchio,M., Kreiger,N., Theis,B., Sloan,M., and Bahl,S. 2003. Hormonal factors and the risk of breast cancer according to estrogen- and progesterone-receptor subgroup

33. Cancer Epidemiol. Biomarkers Prev. 12:1053-1060.

Croghan,I.T., Pruthi,S., Hays,J.T., Cha,S., Johnson,R.E., Kosel,M., Morris,R., and Hurt,R.D. 2009. The role of smoking in breast cancer development: an analysis of a Mayo Clinic cohort  
3. Breast J. 15:489-495.

Dennis,J., Ghadirian,P., Little,J., Lubinski,J., Gronwald,J., Kim-Sing,C., Foulkes,W., Moller,P., Lynch,H.T., Neuhausen,S.L., Domchek,S., Armel,S., Isaacs,C., Tung,N., Sweet,K., Ainsworth,P., Sun,P., Krewski,D., and Narod,S. 2010. Alcohol consumption and the risk of breast cancer among BRCA1 and BRCA2 mutation carriers  
16. Breast 19:479-483.

Dumeaux,V., Lund,E., and Hjartaker,A. 2004. Use of oral contraceptives, alcohol, and risk for invasive breast cancer  
29. Cancer Epidemiol. Biomarkers Prev. 13:1302-1307.

Ericson,U., Sonestedt,E., Gullberg,B., Olsson,H., and Wirfalt,E. 2007. High folate intake is associated with lower breast cancer incidence in postmenopausal women in the Malmo Diet and Cancer cohort  
17. Am. J. Clin. Nutr. 86:434-443.

Ewertz,M. 1991. Alcohol consumption and breast cancer risk in Denmark. Cancer Causes Control 2:247-252.

Feigelson,H.S., Calle,E.E., Robertson,A.S., Wingo,P.A., and Thun,M.J. 2001. Alcohol consumption increases the risk of fatal breast cancer (United States)  
42. Cancer Causes Control 12:895-902.

Feigelson,H.S., Jonas,C.R., Robertson,A.S., McCullough,M.L., Thun,M.J., and Calle,E.E. 2003. Alcohol, folate, methionine, and risk of incident breast cancer in the American Cancer Society Cancer Prevention Study II Nutrition Cohort  
36. Cancer Epidemiol. Biomarkers Prev. 12:161-164.

Ferraroni,M., Decarli,A., Willett,W.C., and Marubini,E. 1991. Alcohol and breast cancer risk: a case-control study from northern Italy. Int. J. Epidemiol. 20:859-864.

Franceschi,S., Serraino,D., Talamini,R., Barra,S., and Bidoli,E. 1991. Alcohol and breast cancer in an area with high alcohol consumption. Rev. Epidemiol. Sante Publique 39:143-148.

Freudenheim,J.L., Marshall,J.R., Graham,S., Laughlin,R., Vena,J.E., Swanson,M., Ambrosone,C., and Nemoto,T. 1995. Lifetime alcohol consumption and risk of breast cancer. Nutr. Cancer 23:1-11.



Fuchs,C.S., Stampfer,M.J., Colditz,G.A., Giovannucci,E.L., Manson,J.E., Kawachi,I., Hunter,D.J., Hankinson,S.E., Hennekens,C.H., and Rosner,B. 1995. Alcohol consumption and mortality among women. *N. Engl. J. Med.* 332:1245-1250.

Gapstur,S.M., Potter,J.D., Sellers,T.A., and Folsom,A.R. 1992. Increased risk of breast cancer with alcohol consumption in postmenopausal women. *Am. J. Epidemiol.* 136:1221-1231.

Garfinkel,L., Boffetta,P., and Stellman,S.D. 1988. Alcohol and breast cancer: a cohort study. *Prev. Med.* 17:686-693.

Garland,M., Hunter,D.J., Colditz,G.A., Spiegelman,D.L., Manson,J.E., Stampfer,M.J., and Willett,W.C. 1999. Alcohol consumption in relation to breast cancer risk in a cohort of United States women 25-42 years of age  
48. *Cancer Epidemiol. Biomarkers Prev.* 8:1017-1021.

Goodman,M.T., Cologne,J.B., Moriwaki,H., Vaeth,M., and Mabuchi,K. 1997. Risk factors for primary breast cancer in Japan: 8-year follow-up of atomic bomb survivors. *Prev. Med.* 26:144-153.

Harris,H.R., Bergkvist,L., and Wolk,A. 2012. Alcohol intake and mortality among women with invasive breast cancer  
2. *Br. J. Cancer* 106:592-595.

Harris,R.E., Namboodiri,K.K., and Wynder,E.L. 1992. Breast cancer risk: effects of estrogen replacement therapy and body mass. *J. Natl. Cancer Inst.* 84:1575-1582.

Harvey,E.B., Schairer,C., Brinton,L.A., Hoover,R.N., and Fraumeni,J.F., Jr. 1987. Alcohol consumption and breast cancer. *J. Natl. Cancer Inst.* 78:657-661.

Herrinton,L.J., Saftlas,A.F., Stanford,J.L., Brinton,L.A., and Wolfe,J.N. 1993. Do alcohol intake and mammographic densities interact in regard to the risk of breast cancer? *Cancer* 71:3029-3035.

Hiatt,R.A. and Bawol,R.D. 1984. Alcoholic beverage consumption and breast cancer incidence. *Am. J. Epidemiol.* 120:676-683.

Hines,L.M., Risendal,B., Slattery,M.L., Baumgartner,K.B., Giuliano,A.R., Sweeney,C., Rollison,D.E., and Byers,T. 2010. Comparative analysis of breast cancer risk factors among Hispanic and non-Hispanic white women  
15. *Cancer* 116:3215-3223.

Hirose,K., Hamajima,N., Takezaki,T., Miura,S., and Tajima,K. 2003. Physical exercise reduces risk of breast cancer in Japanese women

35. *Cancer Sci.* 94:193-199.

Holmberg,L., Baron,J.A., Byers,T., Wolk,A., Ohlander,E.M., Zack,M., and Adami,H.O. 1995. Alcohol intake and breast cancer risk: effect of exposure from 15 years of age. *Cancer Epidemiol. Biomarkers Prev.* 4:843-847.

Horn-Ross,P.L., Hoggatt,K.J., West,D.W., Krone,M.R., Stewart,S.L., Anton,H., Bernstein,C.L., Deapen,D., Peel,D., Pinder,R., Reynolds,P., Ross,R.K., Wright,W., and Zio-gas,A. 2002. Recent diet and breast cancer risk: the California Teachers Study (USA) 41. *Cancer Causes Control* 13:407-415.

Hoyer,A.P. and Engholm,G. 1992. Serum lipids and breast cancer risk: a cohort study of 5,207 Danish women. *Cancer Causes Control* 3:403-408.

Jain,M.G., Ferrenc,R.G., Rehm,J.T., Bondy,S.J., Rohan,T.E., Ashley,M.J., Cohe,J.E., and Miller,A.B. 2000. Alcohol and breast cancer mortality in a cohort study 44. *Breast Cancer Res. Treat.* 64:201-209.

Kabat,G.C., Chang,C.J., Sparano,J.A., Sepkovie,D.W., Hu,X.P., Khalil,A., Rosenblatt,R., and Bradlow,H.L. 1997. Urinary estrogen metabolites and breast cancer: a case-control study. *Cancer Epidemiol. Biomarkers Prev.* 6:505-509.

Kabat,G.C., Miller,A.B., Jain,M., and Rohan,T.E. 2008. Dietary intake of selected B vitamins in relation to risk of major cancers in women 12. *Br. J. Cancer* 99:816-821.

Katsouyanni,K., Trichopoulou,A., Stuver,S., Vassilaros,S., Papadiamantis,Y., Bour-nas,N., Skarpou,N., Mueller,N., and Trichopoulos,D. 1994. Ethanol and breast cancer: an association that may be both confounded and causal. *Int. J. Cancer* 58:356-361.

Kawai,M., Minami,Y., Kakizaki,M., Kakugawa,Y., Nishino,Y., Fukao,A., Tsuji,I., and Ohuchi,N. 2011. Alcohol consumption and breast cancer risk in Japanese women: the Miyagi Cohort study 9. *Breast Cancer Res. Treat.* 128:817-825.

Kawase,T., Matsuo,K., Hiraki,A., Suzuki,T., Watanabe,M., Iwata,H., Tanaka,H., and Ta-jima,K. 2009. Interaction of the effects of alcohol drinking and polymorphisms in alcohol-metabolizing enzymes on the risk of female breast cancer in Japan 2. *J. Epidemiol.* 19:244-250.

Kim,M.K., Ko,M.J., and Han,J.T. 2010. Alcohol consumption and mortality from all-cause and cancers among 1.34 million Koreans: the results from the Korea national health insurance corporation's health examinee cohort in 2000 13. *Cancer Causes Control* 21:2295-2302.

Kinney,A.Y., Millikan,R.C., Lin,Y.H., Moorman,P.G., and Newman,B. 2000. Alcohol consumption and breast cancer among black and white women in North Carolina (United States)

46. *Cancer Causes Control* 11:345-357.

Knight,J.A., Bernstein,L., Largent,J., Capanu,M., Begg,C.B., Mellemkjaer,L., Lynch,C.F., Malone,K.E., Reiner,A.S., Liang,X., Haile,R.W., Boice,J.D., Jr., and Bernstein,J.L. 2009. Alcohol intake and cigarette smoking and risk of a contralateral breast cancer: The Women's Environmental Cancer and Radiation Epidemiology Study

8. *Am. J. Epidemiol.* 169:962-968.

Kotsopoulos,J., Chen,W.Y., Gates,M.A., Tworoger,S.S., Hankinson,S.E., and Rosner,B.A. 2010. Risk factors for ductal and lobular breast cancer: results from the nurses' health study

11. *Breast Cancer Res.* 12:R106.

Kropp,S., Becher,H., Nieters,A., and Chang-Claude,J. 2001. Low-to-moderate alcohol consumption and breast cancer risk by age 50 years among women in Germany

43. *Am. J. Epidemiol.* 154:624-634.

Kruk,J. 2007. Association of lifestyle and other risk factors with breast cancer according to menopausal status: a case-control study in the Region of Western Pomerania (Poland)

15. *Asian Pac. J. Cancer Prev.* 8:513-524.

La Vecchia,C., Negri,E., Parazzini,F., Boyle,P., Fasoli,M., Gentile,A., and Franceschi,S. 1989. Alcohol and breast cancer: update from an Italian case-control study. *Eur. J. Cancer Clin. Oncol* 25:1711-1717.

Le,M.G., Hill,C., Kramar,A., and Flamanti,R. 1984. Alcoholic beverage consumption and breast cancer in a French case-control study. *Am. J. Epidemiol.* 120:350-357.

Lecarpentier,J., Nogues,C., Mouret-Fourme,E., Stoppa-Lyonnet,D., Lasset,C., Caron,O., Fricker,J.P., Gladieff,L., Faivre,L., Sobol,H., Gesta,P., Frenay,M., Luporsi,E., Coupier,I., Lidereau,R., and Andrieu,N. 2011. Variation in breast cancer risk with mutation position, smoking, alcohol, and chest X-ray history, in the French National BRCA1/2 carrier cohort (GENEPSO)

7. *Breast Cancer Res. Treat.* 130:927-938.

Lenz,S.K., Goldberg,M.S., Labreche,F., Parent,M.E., and Valois,M.F. 2002. Association between alcohol consumption and postmenopausal breast cancer: results of a case-control study in Montreal, Quebec, Canada

40. *Cancer Causes Control* 13:701-710.

Levi,F., Pasche,C., Lucchini,F., and La Vecchia,C. 1996. Alcohol and breast cancer in the Swiss Canton of Vaud. *Eur. J. Cancer* 32A:2108-2113.

Lew,J.Q., Freedman,N.D., Leitzmann,M.F., Brinton,L.A., Hoover,R.N., Hollenbeck,A.R., Schatzkin,A., and Park,Y. 2009. Alcohol and risk of breast cancer by histologic type and hormone receptor status in postmenopausal women: the NIH-AARP Diet and Health Study  
5. *Am. J. Epidemiol.* 170:308-317.

Li,C.I., Malone,K.E., Porter,P.L., Weiss,N.S., Tang,M.T., and Daling,J.R. 2003. The relationship between alcohol use and risk of breast cancer by histology and hormone receptor status among women 65-79 years of age  
32. *Cancer Epidemiol. Biomarkers Prev.* 12:1061-1066.

Li,C.I., Chlebowski,R.T., Freiberg,M., Johnson,K.C., Kuller,L., Lane,D., Lessin,L., O'Sullivan,M.J., Wactawski-Wende,J., Yasmineen,S., and Prentice,R. 2010. Alcohol consumption and risk of postmenopausal breast cancer by subtype: the women's health initiative observational study  
14. *J. Natl. Cancer Inst.* 102:1422-1431.

Li,Y., Baer,D., Friedman,G.D., Udaltsova,N., Shim,V., and Klatsky,A.L. 2009. Wine, liquor, beer and risk of breast cancer in a large population  
10. *Eur. J. Cancer* 45:843-850.

Lin,Y., Kikuchi,S., Tamakoshi,K., Wakai,K., Kondo,T., Niwa,Y., Yatsuya,H., Nishio,K., Suzuki,S., Tokudome,S., Yamamoto,A., Toyoshima,H., and Tamakoshi,A. 2005. Prospective study of alcohol consumption and breast cancer risk in Japanese women  
27. *Int. J. Cancer* 116:779-783.

Longnecker,M.P., Paganini-Hill,A., and Ross,R.K. 1995. Lifetime alcohol consumption and breast cancer risk among postmenopausal women in Los Angeles. *Cancer Epidemiol. Biomarkers Prev.* 4:721-725.

Longnecker,M.P., Newcomb,P.A., Mittendorf,R., Greenberg,E.R., Clapp,R.W., Bogdan,G.F., Baron,J., MacMahon,B., and Willett,W.C. 1995. Risk of breast cancer in relation to lifetime alcohol consumption. *J. Natl. Cancer Inst.* 87:923-929.

Lucas,F.L., Cauley,J.A., Stone,R.A., Cummings,S.R., Vogt,M.T., Weissfeld,J.L., and Kuller,L.H. 1998. Bone mineral density and risk of breast cancer: differences by family history of breast cancer. Study of Osteoporotic Fractures Research Group. *Am. J. Epidemiol.* 148:22-29.

Mannisto,S., Virtanen,M., Kataja,V., Uusitupa,M., and Pietinen,P. 2000. Lifetime alcohol consumption and breast cancer: a case-control study in Finland  
47. Public Health Nutr. 3:11-18.

Martin-Moreno,J.M., Boyle,P., Gorgojo,L., Willett,W.C., Gonzalez,J., Villar,F., and Maisonneuve,P. 1993. Alcoholic beverage consumption and risk of breast cancer in Spain. Cancer Causes Control 4:345-353.

Maruti,S.S., Ulrich,C.M., and White,E. 2009. Folate and one-carbon metabolism nutrients from supplements and diet in relation to breast cancer risk  
9. Am. J. Clin. Nutr. 89:624-633.

McCarty,C.A., Reding,D.J., Commins,J., Williams,C., Yeager,M., Burmester,J.K., Schairer,C., and Ziegler,R.G. 2012. Alcohol, genetics and risk of breast cancer in the Prostate, Lung, Colorectal and Ovarian (PLCO) Cancer Screening Trial  
1. Breast Cancer Res. Treat. 133:785-792.

McDonald,J.A., Mandel,M.G., Marchbanks,P.A., Folger,S.G., Daling,J.R., Ursin,G., Simon,M.S., Bernstein,L., Strom,B.L., Norman,S.A., Malone,K.E., Weiss,L.K., Burksman,R.T., Weber,A.L., and Spirtas,R. 2004. Alcohol exposure and breast cancer: results of the women's contraceptive and reproductive experiences study  
28. Cancer Epidemiol. Biomarkers Prev. 13:2106-2116.

McGuire,V., John,E.M., Felberg,A., Haile,R.W., Boyd,N.F., Thomas,D.C., Jenkins,M.A., Milne,R.L., Daly,M.B., Ward,J., Terry,M.B., Andrulis,I.L., Knight,J.A., Godwin,A.K., Giles,G.G., Southey,M., West,D.W., Hopper,J.L., and Whittemore,A.S. 2006. No increased risk of breast cancer associated with alcohol consumption among carriers of BRCA1 and BRCA2 mutations ages <50 years  
22. Cancer Epidemiol. Biomarkers Prev. 15:1565-1567.

Meara,J., McPherson,K., Roberts,M., Jones,L., and Vessey,M. 1989. Alcohol, cigarette smoking and breast cancer. Br. J. Cancer 60:70-73.

Meulepas,J.M., Newcomb,P.A., Burnett-Hartman,A.N., Hampton,J.M., and Trentham-Dietz,A. 2010. Multivitamin supplement use and risk of invasive breast cancer  
20. Public Health Nutr. 13:1540-1545.

Mezzetti,M., La Vecchia,C., Decarli,A., Boyle,P., Talamini,R., and Franceschi,S. 1998. Population attributable risk for breast cancer: diet, nutrition, and physical exercise. J. Natl. Cancer Inst. 90:389-394.

Morabia,A., Bernstein,M., Heritier,S., and Khatchatrian,N. 1996. Relation of breast cancer with passive and active exposure to tobacco smoke. Am. J. Epidemiol. 143:918-928.

Morch,L.S., Johansen,D., Thygesen,L.C., Tjonneland,A., Lokkegaard,E., Stahlberg,C., and Gronbaek,M. 2007. Alcohol drinking, consumption patterns and breast cancer among Danish nurses: a cohort study  
19. Eur. J. Public Health 17:624-629.

Nasca,P.C., Baptiste,M.S., Field,N.A., Metzger,B.B., Black,M., Kwon,C.S., and Jacobson,H. 1990. An epidemiological case-control study of breast cancer and alcohol consumption. Int. J. Epidemiol. 19:532-538.

Newcomb,P.A., Egan,K.M., Titus-Ernstoff,L., Trentham-Dietz,A., Greenberg,E.R., Baron,J.A., Willett,W.C., and Stampfer,M.J. 1999. Lactation in relation to postmenopausal breast cancer. Am. J. Epidemiol. 150:174-182.

Newcomb,P.A., Nichols,H.B., Beasley,J.M., Egan,K., Titus-Ernstoff,L., Hampton,J.M., and Trentham-Dietz,A. 2009. No difference between red wine or white wine consumption and breast cancer risk  
6. Cancer Epidemiol. Biomarkers Prev. 18:1007-1010.

Nielsen,N.R. and Gronbaek,M. 2008. Interactions between intakes of alcohol and postmenopausal hormones on risk of breast cancer  
16. Int. J. Cancer 122:1109-1113.

Ozasa,K. 2007. Alcohol use and mortality in the Japan Collaborative Cohort Study for Evaluation of Cancer (JACC)  
11. Asian Pac. J. Cancer Prev. 8 Suppl:81-88.

Petri,A.L., Tjonneland,A., Gamborg,M., Johansen,D., Hoidrup,S., Sorensen,T.I., and Gronbaek,M. 2004. Alcohol intake, type of beverage, and risk of breast cancer in pre- and postmenopausal women  
30. Alcohol Clin. Exp. Res. 28:1084-1090.

Price,M.A., Tennant,C.C., Smith,R.C., Kennedy,S.J., Butow,P.N., Kossoff,M.B., and Dunn,S.M. 1999. Predictors of breast cancer in women recalled following screening  
49. Aust. N. Z. J. Surg. 69:639-646.

Richardson,S., de,V., I, Pujol,H., and Gerber,M. 1989. Alcohol consumption in a case-control study of breast cancer in southern France. Int. J. Cancer 44:84-89.

Rohan,T.E. and McMichael,A.J. 1988. Alcohol consumption and risk of breast cancer. Int. J. Cancer 41:695-699.

Ronco,A.L., De,S.E., Correa,P., Deneo-Pellegrini,H., Boffetta,P., Acosta,G., and Mendi-laharsu,M. 2011. Dietary benzo[a]pyrene, alcohol drinking, and risk of breast cancer: a case-control study in Uruguay

3. Asian Pac. J. Cancer Prev. 12:1463-1467.

Rosenberg,L., Palmer,J.R., Miller,D.R., Clarke,E.A., and Shapiro,S. 1990. A case-control study of alcoholic beverage consumption and breast cancer. Am. J. Epidemiol. 131:6-14.

Rosenberg,L.U., Einarsdottir,K., Friman,E.I., Wedren,S., Dickman,P.W., Hall,P., and Magnusson,C. 2006. Risk factors for hormone receptor-defined breast cancer in postmenopausal women  
21. Cancer Epidemiol. Biomarkers Prev. 15:2482-2488.

Rossing,M.A., Stanford,J.L., Weiss,N.S., and Habel,L.A. 1996. Oral contraceptive use and risk of breast cancer in middle-aged women. Am. J. Epidemiol. 144:161-164.

Royo-Bordonada,M.A., Martin-Moreno,J.M., Guallar,E., Gorgojo,L., van't Veer,P., Mendez,M., Huttunen,J.K., Martin,B.C., Kardinaal,A.F., Fernandez-Crehuet,J., Thamm,M., Strain,J.J., Kok,F.J., and Kohlmeier,L. 1997. Alcohol intake and risk of breast cancer: the euramic study. Neoplasma 44:150-156.

Sanchez-Zamorano,L.M., Flores-Luna,L., Angeles-Llerenas,A., Romieu,I., Lazcano-Ponce,E., Miranda-Hernandez,H., Mainero-Ratchelous,F., and Torres-Mejia,G. 2011. Healthy lifestyle on the risk of breast cancer  
8. Cancer Epidemiol. Biomarkers Prev. 20:912-922.

Schatzkin,A., Jones,D.Y., Hoover,R.N., Taylor,P.R., Brinton,L.A., Ziegler,R.G., Harvey,E.B., Carter,C.L., Licitra,L.M., Dufour,M.C., and . 1987. Alcohol consumption and breast cancer in the epidemiologic follow-up study of the first National Health and Nutrition Examination Survey. N. Engl. J. Med. 316:1169-1173.

Simon,M.S., Carman,W., Wolfe,R., and Schottenfeld,D. 1991. Alcohol consumption and the risk of breast cancer: a report from the Tecumseh Community Health Study. J. Clin. Epidemiol. 44:755-761.

Smith,S.J., Deacon,J.M., and Chilvers,C.E. 1994. Alcohol, smoking, passive smoking and caffeine in relation to breast cancer risk in young women. UK National Case-Control Study Group. Br. J. Cancer 70:112-119.

Sneyd,M.J., Paul,C., Spears,G.F., and Skegg,D.C. 1991. Alcohol consumption and risk of breast cancer. Int. J. Cancer 48:812-815.

Suzuki,R., Ye,W., Rylander-Rudqvist,T., Saji,S., Colditz,G.A., and Wolk,A. 2005. Alcohol and postmenopausal breast cancer risk defined by estrogen and progesterone receptor status: a prospective cohort study  
24. J. Natl. Cancer Inst. 97:1601-1608.

Suzuki,R., Iwasaki,M., Inoue,M., Sasazuki,S., Sawada,N., Yamaji,T., Shimazu,T., and Tsugane,S. 2010. Alcohol consumption-associated breast cancer incidence and potential effect modifiers: the Japan Public Health Center-based Prospective Study  
19. *Int. J. Cancer* 127:685-695.

Swanson,C.A., Coates,R.J., Malone,K.E., Gammon,M.D., Schoenberg,J.B., Brogan,D.J., McAdams,M., Potischman,N., Hoover,R.N., and Brinton,L.A. 1997. Alcohol consumption and breast cancer risk among women under age 45 years. *Epidemiology* 8:231-237.

Terry,M.B., Zhang,F.F., Kabat,G., Britton,J.A., Teitelbaum,S.L., Neugut,A.I., and Gammon,M.D. 2006. Lifetime alcohol intake and breast cancer risk  
25. *Ann Epidemiol.* 16:230-240.

Thygesen,L.C., Morch,L.S., Keiding,N., Johansen,C., and Gronbaek,M. 2008. Use of baseline and updated information on alcohol intake on risk for breast cancer: importance of latency  
14. *Int. J. Epidemiol.* 37:669-677.

Tjonneland,A., Christensen,J., Olsen,A., Stripp,C., Thomsen,B.L., Overvad,K., Peeters,P.H., van Gils,C.H., Bueno-de-Mesquita,H.B., Ocke,M.C., Thiebaut,A., Fournier,A., Clavel-Chapelon,F., Berrino,F., Palli,D., Tumino,R., Panico,S., Vineis,P., Agudo,A., Ardanaz,E., Martinez-Garcia,C., Amiano,P., Navarro,C., Quiros,J.R., Key,T.J., Reeves,G., Khaw,K.T., Bingham,S., Trichopoulou,A., Trichopoulos,D., Naska,A., Nagel,G., Chang-Claude,J., Boeing,H., Lahmann,P.H., Manjer,J., Wirfalt,E., Hallmans,G., Johansson,I., Lund,E., Skeie,G., Hjartaker,A., Ferrari,P., Slimani,N., Kaaks,R., and Riboli,E. 2007. Alcohol intake and breast cancer risk: the European Prospective Investigation into Cancer and Nutrition (EPIC)  
20. *Cancer Causes Control* 18:361-373.

Toniolo,P., Riboli,E., Protta,F., Charrel,M., and Cappa,A.P. 1989. Breast cancer and alcohol consumption: a case-control study in northern Italy. *Cancer Res.* 49:5203-5206.

Trentham-Dietz,A., Newcomb,P.A., Storer,B.E., and Remington,P.L. 2000. Risk factors for carcinoma in situ of the breast  
45. *Cancer Epidemiol. Biomarkers Prev.* 9:697-703.

van't Veer,P., Kok,F.J., Hermus,R.J., and Sturmans,F. 1989. Alcohol dose, frequency and age at first exposure in relation to the risk of breast cancer. *Int. J. Epidemiol.* 18:511-517.

van den Brandt,P.A., Goldbohm,R.A., and van, V 1995. Alcohol and breast cancer: results from The Netherlands Cohort Study. *Am. J. Epidemiol.* 141:907-915.



Viladiu,P., Izquierdo,A., de,S.S., and Bosch,F.X. 1996. A breast cancer case-control study in Girona, Spain. Endocrine, familial and lifestyle factors. *Eur. J. Cancer Prev.* 5:329-335.

Wang,H., Rothenbacher,D., Low,M., Stegmaier,C., Brenner,H., and Diepgen,T.L. 2006. Atopic diseases, immunoglobulin E and risk of cancer of the prostate, breast, lung and colorectum  
23. *Int. J. Cancer* 119:695-701.

Willett,W.C., Stampfer,M.J., Colditz,G.A., Rosner,B.A., Hennekens,C.H., and Speizer,F.E. 1987. Moderate alcohol consumption and the risk of breast cancer. *N. Engl. J. Med.* 316:1174-1180.

Wrensch,M., Chew,T., Farren,G., Barlow,J., Belli,F., Clarke,C., Erdmann,C.A., Lee,M., Moghadassi,M., Peskin-Mentzer,R., Quesenberry,C.P., Jr., Souders-Mason,V., Spence,L., Suzuki,M., and Gould,M. 2003. Risk factors for breast cancer in a population with high incidence rates  
34. *Breast Cancer Res.* 5:R88-102.

Young,T.B. 1989. A case-control study of breast cancer and alcohol consumption habits. *Cancer* 64:552-558.

Zhang,M. and Holman,C.D. 2011. Low-to-moderate alcohol intake and breast cancer risk in Chinese women  
6. *Br. J. Cancer* 105:1089-1095.

Zhang,Y., Kreger,B.E., Dorgan,J.F., Splansky,G.L., Cupples,L.A., and Ellison,R.C. 1999. Alcohol consumption and risk of breast cancer: the Framingham Study revisited. *Am. J. Epidemiol.* 149:93-101.

Zheng,T., Holford,T.R., Zahm,S.H., Owens,P.H., Boyle,P., Zhang,Y., Zhang,B., Wise,J.P., Sr., Stephenson,L.P., and Ali-Osman,F. 2003. Glutathione S-transferase M1 and T1 genetic polymorphisms, alcohol consumption and breast cancer risk  
37. *Br. J. Cancer* 88:58-62.

Zhu,K., Davidson,N.E., Hunter,S., Yang,X., Payne-Wilks,K., Roland,C.L., Phillips,D., Bentley,C., Dai,M., and Williams,S.M. 2003. Methyl-group dietary intake and risk of breast cancer among African-American women: a case-control study by methylation status of the estrogen receptor alpha genes  
31. *Cancer Causes Control* 14:827-836.

## **Cervix**

Allen,N.E., Beral,V., Casabonne,D., Kan,S.W., Reeves,G.K., Brown,A., and Green,J. 2009. Moderate alcohol intake and cancer incidence in women. *J. Natl. Cancer Inst.* 101:296-305.

Hirose,K., Hamajima,N., Takezaki,T., Kuroishi,T., Kuzuya,K., Sasaki,S., Tokudome,S., and Tajima,K. 1998. Smoking and dietary risk factors for cervical cancer at different age group in Japan. *J. Epidemiol.* 8:6-14.

Kim,M.K., Ko,M.J., and Han,J.T. 2010. Alcohol consumption and mortality from all-cause and cancers among 1.34 million Koreans: the results from the Korea national health insurance corporation's health examinee cohort in 2000. *Cancer Causes Control* 21:2295-2302.

Licciardone,J.C., Wilkins,J.R., III, Brownson,R.C., and Chang,J.C. 1989. Cigarette smoking and alcohol consumption in the aetiology of uterine cervical cancer. *Int. J. Epidemiol.* 18:533-537.

Marshall,J.R., Graham,S., Byers,T., Swanson,M., and Brasure,J. 1983. Diet and smoking in the epidemiology of cancer of the cervix. *J. Natl. Cancer Inst.* 70:847-851.

## Endometrium

Allen,N.E., Beral,V., Casabonne,D., Kan,S.W., Reeves,G.K., Brown,A., and Green,J. 2009. Moderate alcohol intake and cancer incidence in women. *J. Natl. Cancer Inst.* 101:296-305.

Biel,R.K., Csizmadi,I., Cook,L.S., Courneya,K.S., Magliocco,A.M., and Friedenreich,C.M. 2011. Risk of endometrial cancer in relation to individual nutrients from diet and supplements. *Public Health Nutr.* 14:1948-1960.

Friberg,E. and Wolk,A. 2009. Long-term alcohol consumption and risk of endometrial cancer incidence: a prospective cohort study. *Cancer Epidemiol. Biomarkers Prev.* 18:355-358.

Gapstur,S.M., Potter,J.D., Sellers,T.A., Kushi,L.H., and Folsom,A.R. 1993. Alcohol consumption and postmenopausal endometrial cancer: results from the Iowa Women's Health Study. *Cancer Causes Control* 4:323-329.

Hirose,K., Tajima,K., Hamajima,N., Takezaki,T., Inoue,M., Kuroishi,T., Kuzuya,K., Nakamura,S., and Tokudome,S. 1996. Subsite (cervix/endometrium)-specific risk and protective factors in uterus cancer. *Jpn. J. Cancer Res.* 87:1001-1009.

Hosono,S., Matsuo,K., Kajiyama,H., Hirose,K., Suzuki,T., Hiraki,A., Kawase,T., Kidokoro,K., Nakanishi,T., Hamajima,N., Kikkawa,F., Tajima,K., and Tanaka,H. 2008. Reduced risk of endometrial cancer from alcohol drinking in Japanese. *Cancer Sci.* 99:1195-1201.

Jain,M.G., Howe,G.R., and Rohan,T.E. 2000. Nutritional factors and endometrial cancer in Ontario, Canada. *Cancer Control* 7:288-296.

Kabat,G.C., Miller,A.B., Jain,M., and Rohan,T.E. 2008. Dietary intake of selected B vitamins in relation to risk of major cancers in women. *Br. J. Cancer* 99:816-821.

Levi,F., Franceschi,S., Negri,E., and La Vecchia,C. 1993. Dietary factors and the risk of endometrial cancer. *Cancer* 71:3575-3581.

Littman,A.J., Beresford,S.A., and White,E. 2001. The association of dietary fat and plant foods with endometrial cancer (United States). *Cancer Causes Control* 12:691-702.

Loerbroks,A., Schouten,L.J., Goldbohm,R.A., and van den Brandt,P.A. 2007. Alcohol consumption, cigarette smoking, and endometrial cancer risk: results from the Netherlands Cohort Study. *Cancer Causes Control* 18:551-560.

McCann,S.E., Freudenheim,J.L., Marshall,J.R., Brasure,J.R., Swanson,M.K., and Graham,S. 2000. Diet in the epidemiology of endometrial cancer in western New York (United States). *Cancer Causes Control* 11:965-974.

Newcomb,P.A., Trentham-Dietz,A., and Storer,B.E. 1997. Alcohol consumption in relation to endometrial cancer risk. *Cancer Epidemiol. Biomarkers Prev.* 6:775-778.

Parazzini,F., La Vecchia,C., D'Avanzo,B., Moroni,S., Chatenoud,L., and Ricci,E. 1995. Alcohol and endometrial cancer risk: findings from an Italian case-control study. *Nutr. Cancer* 23:55-62.

Setiawan,V.W., Monroe,K.R., Goodman,M.T., Kolonel,L.N., Pike,M.C., and Henderson,B.E. 2008. Alcohol consumption and endometrial cancer risk: the multiethnic cohort. *Int. J. Cancer* 122:634-638.

Swanson,C.A., Wilbanks,G.D., Twiggs,L.B., Mortel,R., Berman,M.L., Barrett,R.J., and Brinton,L.A. 1993. Moderate alcohol consumption and the risk of endometrial cancer. *Epidemiology* 4:530-536.

Terry,P., Baron,J.A., Weiderpass,E., Yuen,J., Lichtenstein,P., and Nyren,O. 1999. Lifestyle and endometrial cancer risk: a cohort study from the Swedish Twin Registry. *Int. J. Cancer* 82:38-42.

Turati,F., Gallus,S., Tavani,A., Tramacere,I., Polesel,J., Talamini,R., Montella,M., Scotti,L., Franceschi,S., and La Vecchia,C. 2010. Alcohol and endometrial cancer risk: a case-control study and a meta-analysis. *Cancer Causes Control* 21:1285-1296.

Webster,L.A. and Weiss,N.S. 1989. Alcoholic beverage consumption and the risk of endometrial cancer. *Cancer and Steroid Hormone Study Group. Int. J. Epidemiol.* 18:786-791.

Weiderpass,E. and Baron,J.A. 2001. Cigarette smoking, alcohol consumption, and endometrial cancer risk: a population-based study in Sweden. *Cancer Causes Control* 12:239-247.

Yang,H.P., Gierach,G.L., Danforth,K.N., Sherman,M.E., Park,Y., Wentzensen,N., Hollenbeck,A., Schatzkin,A., and Brinton,L.A. 2011. Alcohol and endometrial cancer risk in the NIH-AARP diet and health study. *Int. J. Cancer* 128:2953-2961.

## Ovary

Allen,N.E., Beral,V., Casabonne,D., Kan,S.W., Reeves,G.K., Brown,A., and Green,J. 2009. Moderate alcohol intake and cancer incidence in women. *J. Natl. Cancer Inst.* 101:296-305.

Byers,T., Marshall,J., Graham,S., Mettlin,C., and Swanson,M. 1983. A case-control study of dietary and nondietary factors in ovarian cancer. *J. Natl. Cancer Inst.* 71:681-686.

Chang,E.T., Canchola,A.J., Lee,V.S., Clarke,C.A., Purdie,D.M., Reynolds,P., Bernstein,L., Stram,D.O., Anton-Culver,H., Deapen,D., Mohrenweiser,H., Peel,D., Pinder,R., Ross,R.K., West,D.W., Wright,W., Ziogas,A., and Horn-Ross,P.L. 2007. Wine and other alcohol consumption and risk of ovarian cancer in the California Teachers Study cohort. *Cancer Causes Control* 18:91-103.

Genkinger,J.M., Hunter,D.J., Spiegelman,D., Anderson,K.E., Buring,J.E., Freudenheim,J.L., Goldbohm,R.A., Harnack,L., Hankinson,S.E., Larsson,S.C., Leitzmann,M., McCullough,M.L., Marshall,J., Miller,A.B., Rodriguez,C., Rohan,T.E., Schatzkin,A., Schouten,L.J., Wolk,A., Zhang,S.M., and Smith-Warner,S.A. 2006. Alcohol intake and ovarian cancer risk: a pooled analysis of 10 cohort studies. *Br. J. Cancer* 94:757-762.

Godard,B., Foulkes,W.D., Provencher,D., Brunet,J.S., Tonin,P.N., Mes-Masson,A.M., Narod,S.A., and Ghadirian,P. 1998. Risk factors for familial and sporadic ovarian cancer among French Canadians: a case-control study. *Am. J. Obstet. Gynecol.* 179:403-410.

Goodman,M.T. and Tung,K.H. 2003. Alcohol consumption and the risk of borderline and invasive ovarian cancer. *Obstet. Gynecol.* 101:1221-1228.

Gwinn,M.L., Webster,L.A., Lee,N.C., Layde,P.M., and Rubin,G.L. 1986. Alcohol consumption and ovarian cancer risk. *Am. J. Epidemiol.* 123:759-766.

Harris,H.R., Cramer,D.W., Vitonis,A.F., DePari,M., and Terry,K.L. 2012. Folate, vitamin B(6) , vitamin B(12) , methionine and alcohol intake in relation to ovarian cancer risk. *Int. J. Cancer* 131:E518-E529.

Hartge,P., Schiffman,M.H., Hoover,R., McGowan,L., Leshner,L., and Norris,H.J. 1989. A case-control study of epithelial ovarian cancer. *Am. J. Obstet. Gynecol.* 161:10-16.

Kuper,H., Titus-Ernstoff,L., Harlow,B.L., and Cramer,D.W. 2000. Population based study of coffee, alcohol and tobacco use and risk of ovarian cancer. *Int. J. Cancer* 88:313-318.

La Vecchia,C., Negri,E., Franceschi,S., Parazzini,F., Gentile,A., and Fasoli,M. 1992. Alcohol and epithelial ovarian cancer. *J. Clin. Epidemiol.* 45:1025-1030.

McCann,S.E., Freudenheim,J.L., Marshall,J.R., and Graham,S. 2003. Risk of human ovarian cancer is related to dietary intake of selected nutrients, phytochemicals and food groups. *J. Nutr.* 133:1937-1942.

Modugno,F., Ness,R.B., and Allen,G.O. 2003. Alcohol consumption and the risk of mucinous and nonmucinous epithelial ovarian cancer. *Obstet. Gynecol.* 102:1336-1343.

Peterson,N.B., Trentham-Dietz,A., Newcomb,P.A., Chen,Z., Hampton,J.M., Willett,W.C., and Egan,K.M. 2006. Alcohol consumption and ovarian cancer risk in a population-based case-control study. *Int. J. Cancer* 119:2423-2427.

Polychronopoulou,A., Tzonou,A., Hsieh,C.C., Kaprinis,G., Rebelakos,A., Toupadaki,N., and Trichopoulos,D. 1993. Reproductive variables, tobacco, ethanol, coffee and somatometry as risk factors for ovarian cancer. *Int. J. Cancer* 55:402-407.

Riman,T., Dickman,P.W., Nilsson,S., Correia,N., Nordlinder,H., Magnusson,C.M., and Persson,I.R. 2001. Risk factors for epithelial borderline ovarian tumors: results of a Swedish case-control study. *Gynecol. Oncol* 83:575-585.

Riman,T., Dickman,P.W., Nilsson,S., Nordlinder,H., Magnusson,C.M., and Persson,I.R. 2004. Some life-style factors and the risk of invasive epithelial ovarian cancer in Swedish women. *Eur. J. Epidemiol.* 19:1011-1019.

Tavani,A., Gallus,S., Dal,M.L., Franceschi,S., Montella,M., Conti,E., and La Vecchia,C. 2001. Coffee and alcohol intake and risk of ovarian cancer: an Italian case-control study. *Nutr. Cancer* 39:29-34.

Webb,P.M., Purdie,D.M., Bain,C.J., and Green,A.C. 2004. Alcohol, wine, and risk of epithelial ovarian cancer. *Cancer Epidemiol. Biomarkers Prev.* 13:592-599.

Yang,H.P., Trabert,B., Murphy,M.A., Sherman,M.E., Sampson,J.N., Brinton,L.A., Hartge,P., Hollenbeck,A., Park,Y., and Wentzensen,N. 2012. Ovarian cancer risk factors by histologic subtypes in the NIH-AARP Diet and Health Study. *Int. J. Cancer* 131:938-948.

## Prostate

Albertsen,K. and Gronbaek,M. 2002. Does amount or type of alcohol influence the risk of prostate cancer? *Prostate* 52:297-304.

Andersson,S.O., Baron,J., Bergstrom,R., Lindgren,C., Wolk,A., and Adami,H.O. 1996. Lifestyle factors and prostate cancer risk: a case-control study in Sweden. *Cancer Epidemiol. Biomarkers Prev.* 5:509-513.

Baglietto,L., Severi,G., English,D.R., Hopper,J.L., and Giles,G.G. 2006. Alcohol consumption and prostate cancer risk: results from the Melbourne collaborative cohort study. *Int. J. Cancer* 119:1501-1504.

Baker,L.H., Mebust,W.K., Chin,T.D., Chapman,A.L., Hinthorn,D., and Towle,D. 1981. The relationship of herpesvirus to carcinoma of the prostate. *J. Urol.* 125:370-374.

Benedetti,A., Parent,M.E., and Siemiatycki,J. 2009. Lifetime consumption of alcoholic beverages and risk of 13 types of cancer in men: results from a case-control study in Montreal. *Cancer Detect. Prev.* 32:352-362.

Breslow,R.A., Wideroff,L., Graubard,B.I., Erwin,D., Reichman,M.E., Ziegler,R.G., and Ballard-Barbash,R. 1999. Alcohol and prostate cancer in the NHANES I epidemiologic follow-up study. First National Health and Nutrition Examination Survey of the United States. *Ann Epidemiol.* 9:254-261.

Breslow,R.A., Chen,C.M., Graubard,B.I., and Mukamal,K.J. 2011. Prospective study of alcohol consumption quantity and frequency and cancer-specific mortality in the US population. *Am. J. Epidemiol.* 174:1044-1053.

Chang,E.T., Hedelin,M., Adami,H.O., Gronberg,H., and Balter,K.A. 2005. Alcohol drinking and risk of localized versus advanced and sporadic versus familial prostate cancer in Sweden. *Cancer Causes Control* 16:275-284.

Chao,C., Haque,R., Van Den Eeden,S.K., Caan,B.J., Poon,K.Y., and Quinn,V.P. 2010. Red wine consumption and risk of prostate cancer: the California men's health study. *Int. J. Cancer* 126:171-179.

Choi,J.Y., Neuhausser,M.L., Barnett,M.J., Hong,C.C., Kristal,A.R., Thornquist,M.D., King,I.B., Goodman,G.E., and Ambrosone,C.B. 2008. Iron intake, oxidative stress-related genes (MnSOD and MPO) and prostate cancer risk in CARET cohort. *Carcinogenesis* 29:964-970.

Crispo,A., Talamini,R., Gallus,S., Negri,E., Gallo,A., Bosetti,C., La Vecchia,C., Dal,M.L., and Montella,M. 2004. Alcohol and the risk of prostate cancer and benign prostatic hyperplasia. *Urology* 64:717-722.

De,S.E., Fierro,L., Barrios,E., and Ronco,A. 1995. Tobacco, alcohol, diet and risk of prostate cancer. *Tumori* 81:315-320.

Ellison,L.F. 2000. Tea and other beverage consumption and prostate cancer risk: a Canadian retrospective cohort study. *Eur. J. Cancer Prev.* 9:125-130.

Gaziano,J.M., Gaziano,T.A., Glynn,R.J., Sesso,H.D., Ajani,U.A., Stampfer,M.J., Manson,J.E., Hennekens,C.H., and Buring,J.E. 2000. Light-to-moderate alcohol consumption and mortality in the Physicians' Health Study enrollment cohort. *J. Am. Coll. Cardiol.* 35:96-105.

Gong,Z., Kristal,A.R., Schenk,J.M., Tangen,C.M., Goodman,P.J., and Thompson,I.M. 2009. Alcohol consumption, finasteride, and prostate cancer risk: results from the Prostate Cancer Prevention Trial. *Cancer* 115:3661-3669.

Hayes,R.B., Brown,L.M., Schoenberg,J.B., Greenberg,R.S., Silverman,D.T., Schwartz,A.G., Swanson,G.M., Benichou,J., Liff,J.M., Hoover,R.N., and Pottern,L.M. 1996. Alcohol use and prostate cancer risk in US blacks and whites. *Am. J. Epidemiol.* 143:692-697.

Hiatt,R.A., Armstrong,M.A., Klatsky,A.L., and Sidney,S. 1994. Alcohol consumption, smoking, and other risk factors and prostate cancer in a large health plan cohort in California (United States). *Cancer Causes Control* 5:66-72.

Hodge,A.M., English,D.R., McCredie,M.R., Severi,G., Boyle,P., Hopper,J.L., and Giles,G.G. 2004. Foods, nutrients and prostate cancer. *Cancer Causes Control* 15:11-20.

Hsieh,C.C., Thanos,A., Mitropoulos,D., Deliveliotis,C., Mantzoros,C.S., and Trichopoulos,D. 1999. Risk factors for prostate cancer: a case-control study in Greece. *Int. J. Cancer* 80:699-703.

Hu,J., La Vecchia,C., Gibbons,L., Negri,E., and Mery,L. 2010. Nutrients and risk of prostate cancer. *Nutr. Cancer* 62:710-718.

Jain,M.G., Hislop,G.T., Howe,G.R., Burch,J.D., and Ghadirian,P. 1998. Alcohol and other beverage use and prostate cancer risk among Canadian men. *Int. J. Cancer* 78:707-711.

Jian,L., Xie,L.P., Lee,A.H., and Binns,C.W. 2004. Protective effect of green tea against prostate cancer: a case-control study in southeast China. *Int. J. Cancer* 108:130-135.



Johansson,M., Van,G.B., Vollset,S.E., Hultdin,J., Bergh,A., Key,T., Midttun,O., Hallmans,G., Ueland,P.M., and Stattin,P. 2009. One-carbon metabolism and prostate cancer risk: prospective investigation of seven circulating B vitamins and metabolites. *Cancer Epidemiol. Biomarkers Prev.* 18:1538-1543.

Key,T.J., Silcocks,P.B., Davey,G.K., Appleby,P.N., and Bishop,D.T. 1997. A case-control study of diet and prostate cancer. *Br. J. Cancer* 76:678-687.

Kim,M.K., Ko,M.J., and Han,J.T. 2010. Alcohol consumption and mortality from all-cause and cancers among 1.34 million Koreans: the results from the Korea national health insurance corporation's health examinee cohort in 2000. *Cancer Causes Control* 21:2295-2302.

Le,M.L., Kolonel,L.N., Wilkens,L.R., Myers,B.C., and Hirohata,T. 1994. Animal fat consumption and prostate cancer: a prospective study in Hawaii. *Epidemiology* 5:276-282.

Lumey,L.H., Pittman,B., and Wynder,E.L. 1998. Alcohol use and prostate cancer in U.S. whites: no association in a confirmatory study. *Prostate* 36:250-255.

Murata,M., Takayama,K., Choi,B.C., and Pak,A.W. 1996. A nested case-control study on alcohol drinking, tobacco smoking, and cancer. *Cancer Detect. Prev.* 20:557-565.

Ozasa,K. 2007. Alcohol use and mortality in the Japan Collaborative Cohort Study for Evaluation of Cancer (JACC). *Asian Pac. J. Cancer Prev.* 8 Suppl:81-88.

Putnam,S.D., Cerhan,J.R., Parker,A.S., Bianchi,G.D., Wallace,R.B., Cantor,K.P., and Lynch,C.F. 2000. Lifestyle and anthropometric risk factors for prostate cancer in a cohort of Iowa men. *Ann Epidemiol.* 10:361-369.

Rohrmann,S., Linseisen,J., Key,T.J., Jensen,M.K., Overvad,K., Johnsen,N.F., Tjonneland,A., Kaaks,R., Bergmann,M.M., Weikert,C., Naska,A., Trichopoulou,A., Trichopoulos,D., Pala,V., Sacerdote,C., Palli,D., Tumino,R., Bueno-de-Mesquita,H.B., Vrieling,A., Gonzalez,C.A., Larranaga,N., Navarro,C., Barricarte,A., Quiros,J.R., Martinez-Garcia,C., Hallmans,G., Stattin,P., Manjer,J., Wirfalt,E., Bingham,S., Khaw,K.T., Egevad,L., Ferrari,P., Jenab,M., and Riboli,E. 2008. Alcohol consumption and the risk for prostate cancer in the European Prospective Investigation into Cancer and Nutrition. *Cancer Epidemiol. Biomarkers Prev.* 17:1282-1287.

Schoonen,W.M., Salinas,C.A., Kiemeny,L.A., and Stanford,J.L. 2005. Alcohol consumption and risk of prostate cancer in middle-aged men. *Int. J. Cancer* 113:133-140.

Schuurman,A.G., Goldbohm,R.A., and van den Brandt,P.A. 1999. A prospective cohort study on consumption of alcoholic beverages in relation to prostate cancer incidence (The Netherlands). *Cancer Causes Control* 10:597-605.

Sesso,H.D., Paffenbarger,R.S., Jr., and Lee,I.M. 2001. Alcohol consumption and risk of prostate cancer: The Harvard Alumni Health Study. *Int. J. Epidemiol.* 30:749-755.

Shannon,J., Phoutrides,E., Palma,A., Farris,P., Peters,L., Forester,A., Tillotson,C.J., and Garzotto,M. 2009. Folate intake and prostate cancer risk: a case-control study. *Nutr. Cancer* 61:617-628.

Stemmermann,G.N., Nomura,A.M., Chyou,P.H., and Yoshizawa,C. 1990. Prospective study of alcohol intake and large bowel cancer. *Dig. Dis. Sci.* 35:1414-1420.

Sutcliffe,S., Giovannucci,E., Leitzmann,M.F., Rimm,E.B., Stampfer,M.J., Willett,W.C., and Platz,E.A. 2007. A prospective cohort study of red wine consumption and risk of prostate cancer. *Int. J. Cancer* 120:1529-1535.

Velicer,C.M., Kristal,A., and White,E. 2006. Alcohol use and the risk of prostate cancer: results from the VITAL cohort study. *Nutr. Cancer* 56:50-56.

Wang,H., Rothenbacher,D., Low,M., Stegmaier,C., Brenner,H., and Diepgen,T.L. 2006. Atopic diseases, immunoglobulin E and risk of cancer of the prostate, breast, lung and colorectum. *Int. J. Cancer* 119:695-701.

Watters,J.L., Park,Y., Hollenbeck,A., Schatzkin,A., and Albanes,D. 2010. Alcoholic beverages and prostate cancer in a prospective US cohort study. *Am. J. Epidemiol.* 172:773-780.

Weinstein,S.J., Stolzenberg-Solomon,R., Pietinen,P., Taylor,P.R., Virtamo,J., and Albanes,D. 2006. Dietary factors of one-carbon metabolism and prostate cancer risk. *Am. J. Clin. Nutr.* 84:929-935.

Wynder,E.L., Mabuchi,K., and Whitmore,W.F., Jr. 1971. Epidemiology of cancer of the prostate. *Cancer* 28:344-360.

Yu,H., Harris,R.E., and Wynder,E.L. 1988. Case-control study of prostate cancer and socioeconomic factors. *Prostate* 13:317-325.

## Bladder

Allen,N.E., Beral,V., Casabonne,D., Kan,S.W., Reeves,G.K., Brown,A., and Green,J. 2009. Moderate alcohol intake and cancer incidence in women. *J. Natl. Cancer Inst.* 101:296-305.

Benedetti,A., Parent,M.E., and Siemiatycki,J. 2009. Lifetime consumption of alcoholic beverages and risk of 13 types of cancer in men: results from a case-control study in Montreal. *Cancer Detect. Prev.* 32:352-362.

Bravo,M.P., Del Rey,C.J., and Conde,M. 1987. Bladder cancer and the consumption of alcoholic beverages in Spain. *Eur. J. Epidemiol.* 3:365-369.

Brownson,R.C., Chang,J.C., and Davis,J.R. 1987. Occupation, smoking, and alcohol in the epidemiology of bladder cancer. *Am. J. Public Health* 77:1298-1300.

Bruemmer,B., White,E., Vaughan,T.L., and Cheney,C.L. 1997. Fluid intake and the incidence of bladder cancer among middle-aged men and women in a three-county area of western Washington. *Nutr. Cancer* 29:163-168.

Chyou,P.H., Nomura,A.M., and Stemmermann,G.N. 1993. A prospective study of diet, smoking, and lower urinary tract cancer. *Ann Epidemiol.* 3:211-216.

Djousse,L., Schatzkin,A., Chibnik,L.B., D'Agostino,R.B., Kreger,B.E., and Ellison,R.C. 2004. Alcohol consumption and the risk of bladder cancer in the Framingham Heart Study. *J. Natl. Cancer Inst.* 96:1397-1400.

Donato,F., Boffetta,P., Fazioli,R., Aulenti,V., Gelatti,U., and Porru,S. 1997. Bladder cancer, tobacco smoking, coffee and alcohol drinking in Brescia, northern Italy. *Eur. J. Epidemiol.* 13:795-800.

Geoffroy-Perez,B. and Cordier,S. 2001. Fluid consumption and the risk of bladder cancer: results of a multicenter case-control study. *Int. J. Cancer* 93:880-887.

Jiang,X., Castelao,J.E., Groshen,S., Cortessis,V.K., Ross,R.K., Conti,D.V., and Gago-Dominguez,M. 2007. Alcohol consumption and risk of bladder cancer in Los Angeles County. *Int. J. Cancer* 121:839-845.

Murata,M., Takayama,K., Choi,B.C., and Pak,A.W. 1996. A nested case-control study on alcohol drinking, tobacco smoking, and cancer. *Cancer Detect. Prev.* 20:557-565.

Nomura,A., Kolonel,L.N., and Yoshizawa,C.N. 1989. Smoking, alcohol, occupation, and hair dye use in cancer of the lower urinary tract. *Am. J. Epidemiol.* 130:1159-1163.

Pelucchi,C., Negri,E., Franceschi,S., Talamini,R., and La Vecchia,C. 2002. Alcohol drinking and bladder cancer. *J. Clin. Epidemiol.* 55:637-641.

Pohlabeln,H., Jockel,K.H., and Bolm-Audorff,U. 1999. Non-occupational risk factors for cancer of the lower urinary tract in Germany. *Eur. J. Epidemiol.* 15:411-419.

Slattery,M.L., West,D.W., and Robison,L.M. 1988. Fluid intake and bladder cancer in Utah. *Int. J. Cancer* 42:17-22.

Thomas,D.B., Uhl,C.N., and Hartge,P. 1983. Bladder cancer and alcoholic beverage consumption. *Am. J. Epidemiol.* 118:720-727.

van,D.B., van Houwelingen,K.P., Witjes,J.A., Schalken,J.A., and Kiemeny,L.A. 2001. Alcohol dehydrogenase type 3 (ADH3) and the risk of bladder cancer. *Eur. Urol.* 40:509-514.

Wakai,K., Hirose,K., Takezaki,T., Hamajima,N., Ogura,Y., Nakamura,S., Hayashi,N., and Tajima,K. 2004. Foods and beverages in relation to urothelial cancer: case-control study in Japan. *Int. J. Urol.* 11:11-19.

Zeegers,M.P., Volovics,A., Dorant,E., Goldbohm,R.A., and van den Brandt,P.A. 2001. Alcohol consumption and bladder cancer risk: results from The Netherlands Cohort Study. *Am. J. Epidemiol.* 153:38-41.

## Kidney

Allen,N.E., Beral,V., Casabonne,D., Kan,S.W., Reeves,G.K., Brown,A., and Green,J. 2009. Moderate alcohol intake and cancer incidence in women. *J. Natl. Cancer Inst.* 101:296-305.

Benedetti,A., Parent,M.E., and Siemiatycki,J. 2009. Lifetime consumption of alcoholic beverages and risk of 13 types of cancer in men: results from a case-control study in Montreal. *Cancer Detect. Prev.* 32:352-362.

Greving,J.P., Lee,J.E., Wolk,A., Lukkien,C., Lindblad,P., and Bergstrom,A. 2007. Alcoholic beverages and risk of renal cell cancer. *Br. J. Cancer* 97:429-433.

Hsu,C.C., Chow,W.H., Boffetta,P., Moore,L., Zaridze,D., Moukeria,A., Janout,V., Kollarova,H., Bencko,V., Navratilova,M., Szeszenia-Dabrowska,N., Mates,D., and Brennan,P. 2007. Dietary risk factors for kidney cancer in Eastern and Central Europe. *Am. J. Epidemiol.* 166:62-70.

Hu,J., Chen,Y., Mao,Y., Desmeules,M., and Mery,L. 2008. Alcohol drinking and renal cell carcinoma in Canadian men and women. *Cancer Detect. Prev.* 32:7-14.

Kim,M.K., Ko,M.J., and Han,J.T. 2010. Alcohol consumption and mortality from all-cause and cancers among 1.34 million Koreans: the results from the Korea national health insurance corporation's health examinee cohort in 2000. *Cancer Causes Control* 21:2295-2302.

Lee,J.E., Hunter,D.J., Spiegelman,D., Adami,H.O., Albanes,D., Bernstein,L., van den Brandt,P.A., Buring,J.E., Cho,E., Folsom,A.R., Freudenheim,J.L., Giovannucci,E., Graham,S., Horn-Ross,P.L., Leitzmann,M.F., McCullough,M.L., Miller,A.B., Parker,A.S., Rodriguez,C., Rohan,T.E., Schatzkin,A., Schouten,L.J., Virtanen,M., Willett,W.C., Wolk,A., Zhang,S.M., and Smith-Warner,S.A. 2007. Alcohol intake and renal cell cancer in a pooled analysis of 12 prospective studies. *J. Natl. Cancer Inst.* 99:801-810.

Lew,J.Q., Chow,W.H., Hollenbeck,A.R., Schatzkin,A., and Park,Y. 2011. Alcohol consumption and risk of renal cell cancer: the NIH-AARP diet and health study. *Br. J. Cancer* 104:537-541.

Lindblad,P., Wolk,A., Bergstrom,R., and Adami,H.O. 1997. Diet and risk of renal cell cancer: a population-based case-control study. *Cancer Epidemiol. Biomarkers Prev.* 6:215-223.

Mattioli,S., Truffelli,D., Baldasseroni,A., Risi,A., Marchesini,B., Giacomini,C., Bacchini,P., Violante,F.S., and Buiatti,E. 2002. Occupational risk factors for renal cell cancer: a case--control study in northern Italy. *J. Occup. Environ. Med.* 44:1028-1036.

Mellemgaard,A., Engholm,G., McLaughlin,J.K., and Olsen,J.H. 1994. Risk factors for renal cell carcinoma in Denmark. I. Role of socioeconomic status, tobacco use, beverages, and family history. *Cancer Causes Control* 5:105-113.

Ozasa,K. 2007. Alcohol use and mortality in the Japan Collaborative Cohort Study for Evaluation of Cancer (JACC). *Asian Pac. J. Cancer Prev.* 8 Suppl:81-88.

Parker,A.S., Cerhan,J.R., Lynch,C.F., Ershow,A.G., and Cantor,K.P. 2002. Gender, alcohol consumption, and renal cell carcinoma. *Am. J. Epidemiol.* 155:455-462.

Pelucchi,C., Galeone,C., Montella,M., Polesel,J., Crispo,A., Talamini,R., Negri,E., Ramazzotti,V., Grimaldi,M., Franceschi,S., and La Vecchia,C. 2008. Alcohol consumption and renal cell cancer risk in two Italian case-control studies. *Ann Oncol* 19:1003-1008.

Setiawan,V.W., Stram,D.O., Nomura,A.M., Kolonel,L.N., and Henderson,B.E. 2007. Risk factors for renal cell cancer: the multiethnic cohort. *Am. J. Epidemiol.* 166:932-940.

Wolk,A., Gridley,G., Niwa,S., Lindblad,P., McCredie,M., Mellemgaard,A., Mandel,J.S., Wahrendorf,J., McLaughlin,J.K., and Adami,H.O. 1996. International renal cell cancer study. VII. Role of diet. *Int. J. Cancer* 65:67-73.

Yuan,J.M., Gago-Dominguez,M., Castelao,J.E., Hankin,J.H., Ross,R.K., and Yu,M.C. 1998. Cruciferous vegetables in relation to renal cell carcinoma. *Int. J. Cancer* 77:211-216.

## Thyroid

Allen,N.E., Beral,V., Casabonne,D., Kan,S.W., Reeves,G.K., Brown,A., and Green,J. 2009. Moderate alcohol intake and cancer incidence in women. *J. Natl. Cancer Inst.* 101:296-305.

Guignard,R., Truong,T., Rougier,Y., Baron-Dubourdieu,D., and Guenel,P. 2007. Alcohol drinking, tobacco smoking, and anthropometric characteristics as risk factors for thyroid cancer: a countrywide case-control study in New Caledonia. *Am. J. Epidemiol.* 166:1140-1149.

Iribarren,C., Haselkorn,T., Tekawa,I.S., and Friedman,G.D. 2001. Cohort study of thyroid cancer in a San Francisco Bay area population. *Int. J. Cancer* 93:745-750.

Kabat,G.C., Kim,M.Y., Wactawski-Wende,J., and Rohan,T.E. 2012. Smoking and alcohol consumption in relation to risk of thyroid cancer in postmenopausal women. *Cancer Epidemiol.* 36:335-340.

Mack,W.J., Preston-Martin,S., Dal,M.L., Galanti,R., Xiang,M., Franceschi,S., Hallquist,A., Jin,F., Kolonel,L., La Vecchia,C., Levi,F., Linos,A., Lund,E., McTiernan,A., Mabuchi,K., Negri,E., Wingren,G., and Ron,E. 2003. A pooled analysis of case-control studies of thyroid cancer: cigarette smoking and consumption of alcohol, coffee, and tea. *Cancer Causes Control* 14:773-785.

Meinhold,C.L., Park,Y., Stolzenberg-Solomon,R.Z., Hollenbeck,A.R., Schatzkin,A., and Berrington de,G.A. 2009. Alcohol intake and risk of thyroid cancer in the NIH-AARP Diet and Health Study. *Br. J. Cancer* 101:1630-1634.

Meinhold,C.L., Ron,E., Schonfeld,S.J., Alexander,B.H., Freedman,D.M., Linet,M.S., and Berrington de,G.A. 2010. Nonradiation risk factors for thyroid cancer in the US Radiologic Technologists Study. *Am. J. Epidemiol.* 171:242-252.

Navarro Silvera,S.A., Miller,A.B., and Rohan,T.E. 2005. Risk factors for thyroid cancer: a prospective cohort study. *Int. J. Cancer* 116:433-438.

Rossing,M.A., Cushing,K.L., Voigt,L.F., Wicklund,K.G., and Daling,J.R. 2000. Risk of papillary thyroid cancer in women in relation to smoking and alcohol consumption. *Epidemiology* 11:49-54.

## Brain

Allen,N.E., Beral,V., Casabonne,D., Kan,S.W., Reeves,G.K., Brown,A., and Green,J. 2009. Moderate alcohol intake and cancer incidence in women. *J. Natl. Cancer Inst.* 101:296-305.

Baglietto,L., Giles,G.G., English,D.R., Karahalios,A., Hopper,J.L., and Severi,G. 2011. Alcohol consumption and risk of glioblastoma; evidence from the Melbourne Collaborative Cohort Study. *Int. J. Cancer* 128:1929-1934.

Efird,J.T., Friedman,G.D., Sidney,S., Klatsky,A., Habel,L.A., Udaltsova,N.V., Van den Eeden,S., and Nelson,L.M. 2004. The risk for malignant primary adult-onset glioma in a large, multiethnic, managed-care cohort: cigarette smoking and other lifestyle behaviors. *J. Neurooncol.* 68:57-69.

Hurley,S.F., McNeil,J.J., Donnan,G.A., Forbes,A., Salzberg,M., and Giles,G.G. 1996. Tobacco smoking and alcohol consumption as risk factors for glioma: a case-control study in Melbourne, Australia. *J. Epidemiol. Community Health* 50:442-446.

Kim,M.K., Ko,M.J., and Han,J.T. 2010. Alcohol consumption and mortality from all-cause and cancers among 1.34 million Koreans: the results from the Korea national health insurance corporation's health examinee cohort in 2000. *Cancer Causes Control* 21:2295-2302.

Ryan,P., Lee,M.W., North,B., and McMichael,A.J. 1992. Risk factors for tumors of the brain and meninges: results from the Adelaide Adult Brain Tumor Study. *Int. J. Cancer* 51:20-27.



## Hodgkin Lymphoma

Benedetti,A., Parent,M.E., and Siemiatycki,J. 2009. Lifetime consumption of alcoholic beverages and risk of 13 types of cancer in men: results from a case-control study in Montreal. *Cancer Detect. Prev.* 32:352-362.

Besson,H., Brennan,P., Becker,N., De,S.S., Nieters,A., Font,R., Maynadie,M., Foretova,L., Cocco,P.L., Staines,A., Vornanen,M., and Boffetta,P. 2006. Tobacco smoking, alcohol drinking and Hodgkin's lymphoma: a European multi-centre case-control study (EPILYMPH). *Br. J. Cancer* 95:378-384.

Deandrea,S., Bertuccio,P., Chatenoud,L., Franceschi,S., Serraino,D., and La Vecchia,C. 2007. Reply to 'Alcohol consumption and risk of Hodgkin's lymphoma and multiple myeloma: a multicentre case-control study' by Gorini et al. *Ann Oncol* 18:1119-1121.

Gorini,G., Stagnaro,E., Fontana,V., Miligi,L., Ramazzotti,V., Amadori,D., Rodella,S., Tumino,R., Crosignani,P., Vindigni,C., Fontana,A., Vineis,P., and Seniori,C.A. 2007. Alcohol consumption and risk of Hodgkin's lymphoma and multiple myeloma: a multicentre case-control study. *Ann Oncol* 18:143-148.

Kanda,J., Matsuo,K., Kawase,T., Suzuki,T., Ichinohe,T., Seto,M., Morishima,Y., Tajima,K., and Tanaka,H. 2009. Association of alcohol intake and smoking with malignant lymphoma risk in Japanese: a hospital-based case-control study at Aichi Cancer Center. *Cancer Epidemiol. Biomarkers Prev.* 18:2436-2441.

Klatsky,A.L., Li,Y., Baer,D., Armstrong,M.A., Udaltsova,N., and Friedman,G.D. 2009. Alcohol consumption and risk of hematologic malignancies. *Ann Epidemiol.* 19:746-753.

Lim,U., Morton,L.M., Subar,A.F., Baris,D., Stolzenberg-Solomon,R., Leitzmann,M., Kipnis,V., Mouw,T., Carroll,L., Schatzkin,A., and Hartge,P. 2007. Alcohol, smoking, and body size in relation to incident Hodgkin's and non-Hodgkin's lymphoma risk. *Am. J. Epidemiol.* 166:697-708.

Monnereau,A., Orsi,L., Troussard,X., Berthou,C., Fenaux,P., Soubeyran,P., Marit,G., Huguet,F., Milpied,N., Leporrier,M., Hemon,D., and Clavel,J. 2008. Cigarette smoking, alcohol drinking, and risk of lymphoid neoplasms: results of a French case-control study. *Cancer Causes Control* 19:1147-1160.

Willett,E.V., O'Connor,S., Smith,A.G., and Roman,E. 2007. Does smoking or alcohol modify the risk of Epstein-Barr virus-positive or -negative Hodgkin lymphoma? *Epidemiology* 18:130-136.

## Non-Hodgkin Lymphoma

Allen,N.E., Beral,V., Casabonne,D., Kan,S.W., Reeves,G.K., Brown,A., and Green,J. 2009. Moderate alcohol intake and cancer incidence in women. *J. Natl. Cancer Inst.* 101:296-305.

Benedetti,A., Parent,M.E., and Siemiatycki,J. 2009. Lifetime consumption of alcoholic beverages and risk of 13 types of cancer in men: results from a case-control study in Montreal. *Cancer Detect. Prev.* 32:352-362.

Besson,H., Brennan,P., Becker,N., Nieters,A., De,S.S., Font,R., Maynadie,M., Foretova,L., Cocco,P.L., Staines,A., Vornanen,M., and Boffetta,P. 2006. Tobacco smoking, alcohol drinking and non-Hodgkin's lymphoma: A European multicenter case-control study (EpiLymph). *Int. J. Cancer* 119:901-908.

Casey,R., Piazzon-Fevre,K., Raverdy,N., Forzy,M.L., Tretare,B., Carli,P.M., and Maynadie,M. 2007. Case-control study of lymphoid neoplasm in three French areas: description, alcohol and tobacco consumption. *Eur. J. Cancer Prev.* 16:142-150.

Chang,E.T., Smedby,K.E., Zhang,S.M., Hjalgrim,H., Melbye,M., Ost,A., Wolk,A., Adami,H.O., and Glimelius,B. 2004. Alcohol intake and risk of non-Hodgkin lymphoma in men and women. *Cancer Causes Control* 15:1067-1076.

Chang,E.T., Clarke,C.A., Canchola,A.J., Lu,Y., Wang,S.S., Ursin,G., West,D.W., Bernstein,L., and Horn-Ross,P.L. 2010. Alcohol consumption over time and risk of lymphoid malignancies in the California Teachers Study cohort. *Am. J. Epidemiol.* 172:1373-1383.

Chiu,B.C., Cerhan,J.R., Gapstur,S.M., Sellers,T.A., Zheng,W., Lutz,C.T., Wallace,R.B., and Potter,J.D. 1999. Alcohol consumption and non-Hodgkin lymphoma in a cohort of older women. *Br. J. Cancer* 80:1476-1482.

Chiu,B.C., Weisenburger,D.D., Cantor,K.P., Zahm,S.H., Holmes,F., Burmeister,L.F., and Blair,A. 2002. Alcohol consumption, family history of hematolymphoproliferative cancer, and the risk of non-Hodgkin's lymphoma in men. *Ann Epidemiol.* 12:309-315.

De,S.E., Fierro,L., Barrios,E., and Ronco,A. 1998. Tobacco, alcohol, diet and risk of non-Hodgkin's lymphoma: a case-control study in Uruguay. *Leuk. Res.* 22:445-452.

Holly,E.A., Lele,C., Bracci,P.M., and McGrath,M.S. 1999. Case-control study of non-Hodgkin's lymphoma among women and heterosexual men in the San Francisco Bay Area, California. *Am. J. Epidemiol.* 150:375-389.

Kanda,J., Matsuo,K., Kawase,T., Suzuki,T., Ichinohe,T., Seto,M., Morishima,Y., Tajima,K., and Tanaka,H. 2009. Association of alcohol intake and smoking with malignant

lymphoma risk in Japanese: a hospital-based case-control study at Aichi Cancer Center. *Cancer Epidemiol. Biomarkers Prev.* 18:2436-2441.

Kanda,J., Matsuo,K., Inoue,M., Iwasaki,M., Sawada,N., Shimazu,T., Yamaji,T., Sasazuki,S., and Tsugane,S. 2010. Association of alcohol intake with the risk of malignant lymphoma and plasma cell myeloma in Japanese: a population-based cohort study (Japan Public Health Center-based Prospective Study). *Cancer Epidemiol. Biomarkers Prev.* 19:429-434.

Klatsky,A.L., Li,Y., Baer,D., Armstrong,M.A., Udaltsova,N., and Friedman,G.D. 2009. Alcohol consumption and risk of hematologic malignancies. *Ann Epidemiol.* 19:746-753.

Lim,U., Schenk,M., Kelemen,L.E., Davis,S., Cozen,W., Hartge,P., Ward,M.H., and Stolzenberg-Solomon,R. 2005. Dietary determinants of one-carbon metabolism and the risk of non-Hodgkin's lymphoma: NCI-SEER case-control study, 1998-2000. *Am. J. Epidemiol.* 162:953-964.

Lim,U., Weinstein,S., Albanes,D., Pietinen,P., Teerenhovi,L., Taylor,P.R., Virtamo,J., and Stolzenberg-Solomon,R. 2006. Dietary factors of one-carbon metabolism in relation to non-Hodgkin lymphoma and multiple myeloma in a cohort of male smokers. *Cancer Epidemiol. Biomarkers Prev.* 15:1109-1114.

Lim,U., Morton,L.M., Subar,A.F., Baris,D., Stolzenberg-Solomon,R., Leitzmann,M., Kipnis,V., Mouw,T., Carroll,L., Schatzkin,A., and Hartge,P. 2007. Alcohol, smoking, and body size in relation to incident Hodgkin's and non-Hodgkin's lymphoma risk. *Am. J. Epidemiol.* 166:697-708.

Monnereau,A., Orsi,L., Troussard,X., Berthou,C., Fenaux,P., Soubeyran,P., Marit,G., Huguet,F., Milpied,N., Leporrier,M., Hemon,D., and Clavel,J. 2008. Cigarette smoking, alcohol drinking, and risk of lymphoid neoplasms: results of a French case-control study. *Cancer Causes Control* 19:1147-1160.

Morton,L.M., Holford,T.R., Leaderer,B., Zhang,Y., Zahm,S.H., Boyle,P., Flynn,S., Tallini,G., Owens,P.H., Zhang,B., and Zheng,T. 2003. Alcohol use and risk of non-Hodgkin's lymphoma among Connecticut women (United States). *Cancer Causes Control* 14:687-694.

Nelson,R.A., Levine,A.M., Marks,G., and Bernstein,L. 1997. Alcohol, tobacco and recreational drug use and the risk of non-Hodgkin's lymphoma. *Br. J. Cancer* 76:1532-1537.

Ozasa,K. 2007. Alcohol use and mortality in the Japan Collaborative Cohort Study for Evaluation of Cancer (JACC). *Asian Pac. J. Cancer Prev.* 8 Suppl:81-88.

Polesel,J., Dal,M.L., La Vecchia,C., Montella,M., Spina,M., Crispo,A., Talamini,R., and Franceschi,S. 2007. Dietary folate, alcohol consumption, and risk of non-Hodgkin lymphoma. *Nutr. Cancer* 57:146-150.

Tavani,A., Gallus,S., La Vecchia,C., and Franceschi,S. 2001. Alcohol drinking and risk of non-Hodgkin's lymphoma. *Eur. J. Clin. Nutr.* 55:824-826.

Troy,J.D., Hartge,P., Weissfeld,J.L., Oken,M.M., Colditz,G.A., Mechanic,L.E., and Morton,L.M. 2010. Associations between anthropometry, cigarette smoking, alcohol consumption, and non-Hodgkin lymphoma in the Prostate, Lung, Colorectal, and Ovarian Cancer Screening Trial. *Am. J. Epidemiol.* 171:1270-1281.

Willett,E.V., Smith,A.G., Dovey,G.J., Morgan,G.J., Parker,J., and Roman,E. 2004. Tobacco and alcohol consumption and the risk of non-Hodgkin lymphoma. *Cancer Causes Control* 15:771-780.
